# Supplementary material for: Violence, self-harm and drug or alcohol misuse in adolescents admitted to hospitals in England for injury: a retrospective cohort study
Source: PubMed Central journal article supplement (PMC4322205; doi:10.1136/bmjopen-2014-006079), 2015-02-07
Supplement: bmjopen-2014-006079.draft_revisions.pdf [file bmjopen-2014-006079.draft_revisions.pdf]

# BMJ Open

## Victimisation, self-harm and drug or alcohol misuse in adolescents admitted to hospitals in England for injury: a retrospective cohort study

|                                 |                                                                                                                                                                                                                                                                                                                                                                                                                                                                              |
|---------------------------------|------------------------------------------------------------------------------------------------------------------------------------------------------------------------------------------------------------------------------------------------------------------------------------------------------------------------------------------------------------------------------------------------------------------------------------------------------------------------------|
| Journal:                        | <i>BMJ Open</i>                                                                                                                                                                                                                                                                                                                                                                                                                                                              |
| Manuscript ID:                  | bmjopen-2014-006079                                                                                                                                                                                                                                                                                                                                                                                                                                                          |
| Article Type:                   | Research                                                                                                                                                                                                                                                                                                                                                                                                                                                                     |
| Date Submitted by the Author:   | 10-Jul-2014                                                                                                                                                                                                                                                                                                                                                                                                                                                                  |
| Complete List of Authors:       | Herbert, Anne; UCL Institute of Child Health, Population, Policy and Practice Programme<br>Gilbert, Ruth; UCL Institute of Child Health, Population, Policy and Practice Programme<br>Gonzalez-Izquierdo, Arturo; UCL Institute of Child Health, Population, Policy and Practice Programme; UCL Institute of Child Health, Centre for Paediatric Epidemiology and Biostatistics London<br>Li, Leah; UCL Institute of Child Health, Population, Policy and Practice Programme |
| <b>Primary Subject Heading</b>: | Paediatrics                                                                                                                                                                                                                                                                                                                                                                                                                                                                  |
| Secondary Subject Heading:      | Mental health, Health services research                                                                                                                                                                                                                                                                                                                                                                                                                                      |
| Keywords:                       | MENTAL HEALTH, Non-accidental injury < PAEDIATRICS, Substance misuse < PSYCHIATRY, Suicide & self-harm < PSYCHIATRY                                                                                                                                                                                                                                                                                                                                                          |
|                                 |                                                                                                                                                                                                                                                                                                                                                                                                                                                                              |

SCHOLARONE™  
Manuscripts

only

1  
2  
3  
4  
5 1 **Victimisation, self-harm and drug or alcohol misuse in**  
6  
7  
8 2 **adolescents admitted to hospitals in England for injury: a**  
9  
10 3 **retrospective cohort study**  
11  
12  
13 4

15 5 Annie Herbert, Centre for Paediatric Epidemiology & Biostatistics, University  
16  
17 6 College London Institute of Child Health, 30 Guilford Street, London, WC1N  
18  
19 7 1EH, Tel: +44207 905 2790, Fax: +44207 905 2793,  
20  
21 8 [annie.herbert.12@ucl.ac.uk](mailto:annie.herbert.12@ucl.ac.uk)  
22  
23

24 9  
25  
26 10 *Annie Herbert, M.Sc.<sup>1</sup>, Ruth Gilbert, M.D.<sup>1</sup>, Arturo González-*  
27  
28 11 *Izquierdo, Ph.D.<sup>1</sup>, Leah Li, Ph.D.<sup>1</sup>*  
29  
30

31 12  
32 13 1. Centre for Paediatric Epidemiology & Biostatistics, University College  
33  
34 14 London Institute of Child Health, 30 Guilford Street, London, WC1N 1EH, UK  
35  
36

37 15 Short title: Adversity in adolescents admitted to hospital for injury  
38

39 16 *Key words: Wounds and Injuries, Violence, Self-injurious Behaviour,*  
40  
41 17 *Substance-related Disorders, Adolescent*  
42  
43

44 18  
45  
46 19 Word count: 2,509  
47

48 20 No. figures: 2  
49

50 21 No tables: 2  
51

52 22 No references: 32  
53  
54

55 23 No supplementary files for online only publication: 5  
56  
57  
58  
59  
60

1  
2  
3 24  
4  
56 **ABSTRACT**7  
8 **Objectives**

9  
10 Of adolescents in the general population in England, we aimed to determine  
11  
12 1) the proportion that has an emergency admission to hospital for injury  
13  
14 related to adversity (victimisation, self-harm or drug or alcohol misuse) and 2)  
15  
16 the risk of recurrent emergency admissions for injury in adolescents admitted  
17  
18 with adversity-related injury compared with those admitted with accident-  
19  
20 related injury only.  
21  
22

23 **Design**

24  
25 We used hospital administrative data (Hospital Episode Statistics) to identify  
26  
27 10-19 year olds with emergency admissions for injury in England in 1998-  
28  
29 2011. We used Office for National Statistics mid-year estimates for  
30  
31 population denominators.  
32  
33

34 **Results**

35  
36 Approximately 4.3% of adolescents in the general population had one or more  
37  
38 emergency admissions for adversity-related injury (140 512/3 254 046; girls  
39  
40 4.6%, boys 4.1%), accounting for 59.9% of all emergency admissions for  
41  
42 injury in girls and 29.6% in boys. Admissions for self-harm or drug or alcohol  
43  
44 misuse commonly occurred in the same girls and boys. Recurrent emergency  
45  
46 admissions for injury were more common in adolescents with adversity-  
47  
48 related injury (girls 17%; boys 17%) than in those with accident-related injury  
49  
50 only (girls 5%; boys 7%), particularly for adolescents with adversity-related  
51  
52 injury related to multiple types of adversity (girls 21%; boys 24%).  
53  
54  
55  
56

57 **Conclusion**58  
59  
60

1  
2  
3  
4  
5  
6  
7  
8  
9  
10  
11  
12  
13  
14  
15  
16  
17  
18  
19  
20  
21  
22  
23  
24  
25  
26  
27  
28  
29  
30  
31  
32  
33  
34  
35  
36  
37  
38  
39  
40  
41  
42  
43  
44  
45  
46  
47  
48  
49  
50  
51  
52  
53  
54  
55  
56  
57  
58  
59  
60

49 Hospital-based interventions should be developed to reduce the risk of future  
50 injury in adolescents admitted for adversity-related injury.

For peer review only

1  
2  
3 51 **What is already known on this subject**  
4

- 5 52 • Adolescents exposed to adversity (victimisation, self-harm or drug or  
6 alcohol misuse) often use health services, and repetitively.  
7 53  
8  
9 54 • Many adolescents in the general population are exposed to multiple  
10 types of adversity during their adolescence.  
11 55  
12  
13  
14  
15  
16

17 57 **What this study adds**

- 18 58 • One in 20 adolescents in England have an emergency admission to  
19 hospital for adversity-related injury between 10 and 19 years old.  
20 59  
21  
22 60 • Many adolescents admitted with adversity-related injury (particularly  
23 girls) are admitted with multiple types of adversity, self-harm and drug  
24 or alcohol misuse being the most common combination.  
25 61  
26  
27 62  
28  
29 63 • Readmission is more common in these adolescents than those  
30 admitted with accident-related injury only.  
31 64  
32  
33  
34  
35  
36

37 66 **Strengths and limitations of this study**

- 38 67 • Hospital Episodes Statistics (HES) captured data on all admissions to  
39 National Health Service hospitals in England at 10-19 years old in this  
40 study's cohort.  
41 68  
42  
43 69  
44  
45 70 • The longitudinal link between admissions for each individual in HES  
46 data allowed us to study the burden of multiple emergency admissions  
47 for injury over time.  
48 71  
49  
50 72  
51  
52 73 • However, victimisation, self-harm and drug or alcohol misuse are not  
53 always recognised at an admission, or consistently recorded, and  
54 74  
55  
56  
57  
58  
59  
60

1  
2  
3  
4  
5  
6  
7  
8  
9  
10  
11  
12  
13  
14  
15  
16  
17  
18  
19  
20  
21  
22  
23  
24  
25  
26  
27  
28  
29  
30  
31  
32  
33  
34  
35  
36  
37  
38  
39  
40  
41  
42  
43  
44  
45  
46  
47  
48  
49  
50  
51  
52  
53  
54  
55  
56  
57  
58  
59  
60

75            therefore this study's estimates of prevalence of adversity are likely to  
76            be underestimates.

For peer review only

## 77 INTRODUCTION

78 Many adolescents exposed to adversity such as victimisation (maltreatment or  
79 assault), self-harm, or drug or alcohol misuse use secondary health  
80 services,[1 2] often repetitively.[3 4] For example, in a self-report survey of  
81 15-16 year olds in England, 12.6% of those who had self-harmed had  
82 presented to hospital.[2] It is also estimated that approximately one-third of  
83 patients attending a hospital in England for self-harm re-attend for self-harm in  
84 the following year.[4] Improved management of adolescents exposed to  
85 adversity could reduce risk of repetition as well as the burden on secondary  
86 care.[5-7]

87 An admission to hospital provides the 'teachable moment',[8] where  
88 both adolescents and their families may be more likely to engage an  
89 intervention than if they had received it elsewhere. Hospital-based  
90 interventions to reduce the risk of future harm could benefit these adolescents  
91 by reducing episodes of injury, and may reduce recurrent emergency (i.e.,  
92 acute or unplanned) admissions for injury.

93 To-date, there is a lack of evidence on how different types of adversity  
94 related injury occur in the same adolescents, over time. In addition, policy  
95 makers and service providers need know how many adolescents have an  
96 emergency admission to hospital for adversity-related injury, their  
97 characteristics and their specific rates of re-admission if they are to be  
98 feasibly targeted for intervention.

99 In this study we used administrative hospital data and Office for  
100 National Statistics (ONS) mid-year population estimates to estimate the  
101 number of adolescents in the general population who ever have an

1  
2  
3 102 emergency admission to hospital for injury. We then estimated the  
4  
5 103 prevalence of emergency admissions for injury related to victimisation, self-  
6  
7 104 harm and drug or alcohol misuse (alone and co-occurring) in the general  
8  
9 105 population. Finally we determined the risk of recurrent emergency admissions  
10  
11 106 for injury in adolescents who had at least one admission between 10 and 19  
12  
13 107 years for adversity-related injury compared with adolescents only ever  
14  
15 108 admitted for accidental injury during the same period.  
16  
17  
18  
19  
20  
21  
22  
23  
24  
25  
26  
27  
28  
29  
30  
31  
32  
33  
34  
35  
36  
37  
38  
39  
40  
41  
42  
43  
44  
45  
46  
47  
48  
49  
50  
51  
52  
53  
54  
55  
56  
57  
58  
59  
60



1  
2  
3  
4  
5 109 **METHODS**  
6  
7

8 110 **Study population**  
9

10 111 Using administrative data from all admissions to National Health Service  
11 hospitals in England (Hospital Episode Statistics [HES]) in 1998-2011,[9] we  
12 derived a retrospective cohort of adolescents who turned 10 years old in  
13 1998-2002, who could be observed throughout adolescence until 19 years old  
14 (Supplementary Table 1).[10] Each individual also had to have at least one  
15 emergency admission for injury between 10 and 19 years old.  
16  
17  
18  
19  
20  
21  
22  
23

24 117 **Admission data**  
25

26 118 The Health and Social Care Information Centre provided pseudonymised data  
27 on hospital admissions, use of which did not require Research Ethics  
28 Committee approval.[11] We analysed any hospital transfers or admissions  
29 within one day after discharge as the same admission, as previously  
30 described.[12] We used the variable for method of admission ('admimeth') to  
31 define an emergency admission. We used all International Classification of  
32 Diseases-10 (ICD-10) diagnosis codes recorded during an admission to  
33 categorise admissions as being for injury related to adversity, an accident or  
34 other causes (Supplementary Table 2).[13]  
35  
36  
37  
38  
39  
40  
41  
42  
43  
44  
45  
46

47 127 **Types of injury and age at emergency admission**  
48

49 128 We defined an emergency admission for injury as being for related to  
50 adversity, comprising victimisation (maltreatment/assault), self-harm or drug  
51 or alcohol misuse, using mutually exclusive clusters of ICD-10 codes  
52 (Supplementary Table 2). Victimisation was defined by previously validated  
53  
54  
55  
56  
57  
58  
59  
60

1  
2  
3 132 codes, which would trigger consideration of maltreatment by carers or of  
4  
5 133 assault.[12 14 15] We defined self-harm using codes that mentioned either  
6  
7 134 'self-harm' or 'self-poisoning', and excluded 'undetermined intent'. Drug or  
8  
9 135 alcohol misuse was defined by codes that mentioned 'alcohol', 'drugs',  
10  
11 136 'noxious substance' or 'solvent'. We considered alcohol use (Z72.1) to be  
12  
13 137 misuse only in adolescents younger than 18. We defined an injury as being  
14  
15 138 related to accidents only if no adversity codes were present but there were  
16  
17 139 codes from the ICD-10 *Accidents* subchapter (V01-X59).[13]

20  
21 We grouped age at each admission as 10-14 years, 15-17 years and  
22  
23 141 18-19 years, to reflect age of onset of puberty (10-14 years), age of sitting  
24  
25 142 secondary school exams (15-18 years) and the legal age for buying alcohol  
26  
27 143 (18 years).[16-19]

30  
31 **144 Classification of adolescents according to types of injury and age at**  
32  
33 **145 emergency admissions**

34  
35 146 We classed adolescents into groups according to all of their emergency  
36  
37 147 admissions for injury between 10 and 19 years old. Adolescents were  
38  
39 148 classed as belonging to the 'AdvRI' group (any adversity-related injury  
40  
41 149 between 10 and 19 years old), 'AccRI Only' group (no adversity-related injury  
42  
43 150 but one or more accident-related injuries) or 'Other Causes' group (no  
44  
45 151 adversity-related or accident-related injuries) (Supplementary Figure 1).

46  
47 152 Among adolescents in the AdvRI group, we determined the proportion  
48  
49 153 exposed to victimisation-, self-harm- and drug or alcohol misuse-related injury  
50  
51 154 at age 10-19, respectively. We further classified the AdvRI group into seven  
52  
53 155 mutually exclusive sub-groups: Victimisation Only, Self-harm Only, Drug or  
54  
55 156 Alcohol Misuse Only (DA Only), Victimisation and Self-harm (V+SH),  
56  
57  
58  
59  
60

1  
2  
3 157 Victimization and Drug or Alcohol Misuse (V+DA), Self-harm and Drug or  
4  
5 158 Alcohol Misuse (SH+ DA) and Victimization, Self-harm and Drug or Alcohol  
6  
7 159 Misuse (V+SH+DA).  
8

9  
10 160 We also grouped adolescents as above, according to their emergency  
11  
12 161 admissions for injury at 10-14 years only, 15-17 years only and 18-19 years  
13  
14 162 only (Supplementary Figure 2).  
15

### 163 **Defining an adolescent as having a chronic condition**

164 We used a previously validated cluster of ICD-10 codes to identify  
165 adolescents who had been affected by a chronic condition in any admission  
166 between 10 and 19 years old (Supplementary Table 2).  
17

### 167 **Population denominators**

168 We used ONS mid-year population estimates to derive population  
169 denominators.[20 21] These data are freely available online broken down by  
170 sex and year of age.  
17

### 171 **Analyses**

172 We estimated the proportion of adolescents in the general population who had  
173 an emergency admission for injury between 10 and 19 years old, by using the  
174 number of adolescents in our derived retrospective cohort as the numerator  
175 and ONS mid-year estimates for 10 year olds in 1998-2002 as the population  
176 denominator. We then calculated these proportions by types of injury at 10-  
177 19 years old (adversity-related [AdvRI group and seven mutually exclusive  
178 subgroups] and accidents only [AccRI Only group]) and by age group, as  
179 described above.  
18  
19  
20  
21  
22  
23  
24  
25  
26  
27  
28  
29  
30  
31  
32  
33  
34  
35  
36  
37  
38  
39  
40  
41  
42  
43  
44  
45  
46  
47  
48  
49  
50  
51  
52  
53  
54  
55  
56  
57  
58  
59  
60

1  
2  
3 180 We calculated the proportion of adolescents in the AdvRI group (and  
4  
5 181 subgroups) and in the AccRI Only group, who had an emergency admission  
6  
7 182 for injury twice and three or more times between 10 and 19 years old. We  
8  
9  
10 183 also calculated the proportions of adolescents with two or three or more  
11  
12 184 admissions of any type (including non-emergency and non-injury).

13  
14 185 We reported all results separately for girls and boys, since differences  
15  
16 186 between girls and boys have been reported for prevalence of adversity in the  
17  
18 187 general population.[1 22-24] We calculated 95% confidence intervals for all  
19  
20  
21 188 proportions but did not present them as they were all too narrow to convey  
22  
23 189 any useful information (within one unit of the sample estimate). Analyses  
24  
25 190 were carried out in StataSE 12.  
26  
27  
28  
29  
30  
31  
32  
33  
34  
35  
36  
37  
38  
39  
40  
41  
42  
43  
44  
45  
46  
47  
48  
49  
50  
51  
52  
53  
54  
55  
56  
57  
58  
59  
60

1  
2  
3  
4  
5 191 **RESULTS**  
6

7 192 There were 1 033 702 adolescents in HES admissions data in 1998-2011, of  
8  
9 193 which 402 916 formed the study cohort (462 476 emergency admission for  
10  
11 194 injury, 802 682 admissions of any type [including non-emergency and non-  
12  
13 195 injury]) (Table 1), representing 12.4% (402 916/3 254 046) of the adolescent  
14  
15 196 population. Twice as many boys as girls had an emergency admission for  
16  
17 197 injury during adolescence (144 158/1 588 942 girls in the population [8.7%];  
18  
19 198 258 503/1 665 104 boys [16.3%]).  
20  
21  
22  
23  
24  
25  
26  
27  
28  
29  
30  
31  
32  
33  
34  
35  
36  
37  
38  
39  
40  
41  
42  
43  
44  
45  
46  
47  
48  
49  
50  
51  
52  
53  
54  
55  
56  
57  
58  
59  
60

199 **Table 1.** Characteristics of adolescents\* between 10 and 19 years old

| Characteristics          | Adolescent Population† | Adolescents with emergency admission(s) for injury between 10 and 19 years old, n (row %)           |                        |                        |                       |
|--------------------------|------------------------|-----------------------------------------------------------------------------------------------------|------------------------|------------------------|-----------------------|
|                          | Total                  | Total                                                                                               | AdvRI                  | AccRI Only             | Other Causes          |
| <b>All</b>               | <b>3,254,046</b>       | <b>402,916 (100.0)</b>                                                                              | <b>140,512 (34.9)</b>  | <b>234,665 (58.2)</b>  | <b>27,739 (6.9)</b>   |
| <b>Age**</b>             |                        |                                                                                                     |                        |                        |                       |
| <b>Girls</b>             | <b>1,588,942</b>       | <b>144,158 (100.0)</b>                                                                              | <b>72,768 (50.5)</b>   | <b>59,528 (41.3)</b>   | <b>11,862 (8.2)</b>   |
| 10-14 years              | .                      | 65,208 (100.0)                                                                                      | 23,289 (35.7)          | 37,303 (57.2)          | 4,616 (7.1)           |
| 15-17 years              | .                      | 48,286 (100.0)                                                                                      | 31,620 (65.5)          | 12,882 (26.7)          | 3,784 (7.8)           |
| 18-19 years              | .                      | 30,664 (100.0)                                                                                      | 17,859 (58.2)          | 9,343 (30.5)           | 3,462 (11.3)          |
| <b>Boys</b>              | <b>1,665,104</b>       | <b>258,503 (100.0)</b>                                                                              | <b>67,704 (26.2)</b>   | <b>174,962 (67.7)</b>  | <b>15,837 (6.1)</b>   |
| 10-14 years              | .                      | 121,821 (100.0)                                                                                     | 17,660 (14.5)          | 97,511 (80.0)          | 6,650 (5.5)           |
| 15-17 years              | .                      | 79,223 (100.0)                                                                                      | 25,004 (31.6)          | 49,366 (62.3)          | 4,853 (6.1)           |
| 18-19 years              | .                      | 57,459 (100.0)                                                                                      | 25,040 (43.6)          | 28,085 (48.9)          | 4,334 (7.5)           |
| Missing (Sex)            | .                      | 255 (100.0)                                                                                         | 40 (15.7)              | 175 (68.6)             | 40 (15.7)             |
|                          |                        | <b>Adolescents with emergency admission(s) for injury between 10 and 19 years old, n (column %)</b> |                        |                        |                       |
|                          |                        | <b>Total</b>                                                                                        | <b>AdvRI</b>           | <b>AccRI Only</b>      | <b>Other Causes</b>   |
| <b>All</b>               | <b>3,254,046</b>       | <b>402,916 (100.0)</b>                                                                              | <b>140,512 (100.0)</b> | <b>234,665 (100.0)</b> | <b>27,739 (100.0)</b> |
| <b>Chronic Condition</b> | .                      | <b>117,190 (29.0)</b>                                                                               | <b>47,001 (33.4)</b>   | <b>52,509 (22.4)</b>   | <b>16,706 (60.0)</b>  |

1  
2  
3  
4  
5  
6  
7 200 AdvRI = Adversity-related Injury, AccRI Only = Accident-related Injury Only.  
8 201 \*Adolescents whose entire ten years of adolescence (ages 10-19) occurred in 1998-2011.  
9 202 †Based on ONS mid-year England statistics for 10 year olds in 1998-2002.[20]  
10 203 \*\*At first emergency admission for injury  
11  
12  
13  
14  
15  
16  
17  
18  
19  
20  
21  
22  
23  
24  
25  
26  
27  
28  
29  
30  
31  
32  
33  
34  
35  
36  
37  
38  
39  
40  
41  
42  
43  
44  
45  
46  
47  
48  
49

For peer review only

## 204 **Types of injury and age at emergency admission**

205 One-third of the cohort (140 152, 4.3% of the population) had a record of an  
206 emergency admission for adversity-related injury between 10 and 19 years  
207 old (the AdvRI group; 153 633 emergency admissions for adversity-related  
208 injury) (Table 1), with similar rates between sexes (72 768, 4.3% girls in the  
209 population; 67 704, 4.1% boys).

210 The remaining two-thirds of the cohort (262 404, 8.1% of the  
211 adolescent population) had emergency admissions for injury which were  
212 never related to adversity (Table 1). Among these adolescents, 234 665  
213 (89.4%) had an accident-related injury (the AccRI Only group, 7.2% of the  
214 population) and 27 739 (10.6%) had no accident-related injury (Other Causes  
215 group, 0.9% of the population). A higher proportion of the Other Causes  
216 group were affected by a chronic condition between 10 and 19 years old (16  
217 706/27 739, 60%), compared with the AdvRI group (47 001/140 512, 33%) or  
218 AccRI Only group (52 509/234 665, 22%).

219 These groupings (AdvRI [and subgroups], AccRI, Other Causes) are  
220 provided in Supplementary Table 3, as proportions of adolescents in the  
221 general population and within individual age groups.

## 222 **Types of adversity-related injury**

223 Among adolescents in the AdvRI group (girls 72 768, boys 67,704) (Figure 1),  
224 the most common type of adversity was drug or alcohol misuse (girls 91.1%,  
225 boys 58.0%). A higher proportion of boys than girls were exposed to  
226 victimisation (girls 17.5%, boys 51.7%), but a higher proportion of girls than  
227 boys were exposed to self-harm (girls 74.6%; boys 31.0%).



1  
2  
3 228 Girls in the AdvRI group were most likely to be exposed to multiple  
4  
5 229 types of adversity between 10 and 19 years old (73.6%) (Figure 1), especially  
6  
7 230 SH+DA (61.7%, i.e., most of the 73.6%). Fewer boys in the AdvRI group  
8  
9 231 were exposed to multiple types of adversity (36.2%), the most common  
10  
11 232 combination also being SH+DA (22.7%).  
12  
13

14 233 For most of the adolescents who exposed to multiple types of  
15  
16 234 adversity, the combination of types was recorded at the same admission. For  
17  
18 235 example, among the 352 adolescent girls who were exposed to victimisation  
19  
20 236 and self-harm between 10 and 19 years old (Figure 1), 85.3% had both  
21  
22 237 victimisation and self-harm codes present simultaneously at at least one  
23  
24 238 emergency admission for injury (V+DA 86.1%, SH+ DA 99.7%, V+ SH+ DA  
25  
26 239 83.2%; boys: V+SH 63.2%, V+DA 84.5%, SH+DA 99.0%, V+SH+DA 59.1%)  
27  
28  
29 240 (data not shown).  
30  
31

### 32 241 **Emergency readmissions for injury**

33  
34 242 Adolescent girls in the AdvRI group (50.5% of all girls in the cohort) accounted  
35  
36 243 for 59.9% of the total number of emergency admissions for injury coming from  
37  
38 244 girls (data not shown), compared with girls in the AccRI Only group (41.3% of  
39  
40 245 all girls) who accounted for 15.1%. Boys in the AdvRI group (26.2% of all  
41  
42 246 boys in the cohort) accounted for 29.6% compared with 61.7% contributed by  
43  
44 247 boys in the AccRI Only group (67.7% of all boys).  
45  
46  
47

48 248 More adolescents in the AdvRI group were readmitted for injury (i.e.,  
49  
50 249 had two or more emergency admissions for injury) between 10 and 19 years  
51  
52 250 old (both girls and boys 17%) (Figure 2), than in the AccRI Only group (girls  
53  
54 251 5%; boys 7%). Among adolescents admitted for AdvRIs related to multiple  
55  
56  
57  
58  
59  
60

1  
2  
3  
4  
5  
6  
7  
8  
9  
10  
11  
12  
13  
14  
15  
16  
17  
18  
19  
20  
21  
22  
23  
24  
25  
26  
27  
28  
29  
30  
31  
32  
33  
34  
35  
36  
37  
38  
39  
40  
41  
42  
43  
44  
45  
46  
47  
48  
49  
50  
51  
52  
53  
54  
55  
56  
57  
58  
59  
60

252 types of adversity (Table 2), the proportion readmitted was even higher  
253 (multiple types: girls 21%, boys 24%; single type: girls 7%, boys 12%).

For peer review only

254 **Table 2.** Proportion of adolescent girls and boys with 1, 2 or 3+ emergency admission(s) for injury or 1, 2 or 3+ admissions of any  
 255 type, by types of adversity between 10 and 19 years old\*

| Adolescent group*       | No. girls      | Girls (%)                         |             |            |                          |             |             | No. boys       | Boys (%)                          |             |            |                          |             |             |
|-------------------------|----------------|-----------------------------------|-------------|------------|--------------------------|-------------|-------------|----------------|-----------------------------------|-------------|------------|--------------------------|-------------|-------------|
|                         |                | Emergency admission(s) for injury |             |            | Admission(s) of any type |             |             |                | Emergency admission(s) for injury |             |            | Admission(s) of any type |             |             |
|                         |                | 1                                 | 2           | 3+         | 1                        | 2           | 3+          |                | 1                                 | 2           | 3+         | 1                        | 2           | 3+          |
| <b>All</b>              | <b>144,158</b> | <b>88.6</b>                       | <b>8.3</b>  | <b>3.1</b> | <b>57.6</b>              | <b>20.5</b> | <b>22.0</b> | <b>258,503</b> | <b>90.3</b>                       | <b>8.0</b>  | <b>1.8</b> | <b>68.5</b>              | <b>18.7</b> | <b>12.9</b> |
| <b>AdvRI</b>            | <b>72,768</b>  | <b>82.6</b>                       | <b>12.0</b> | <b>5.3</b> | <b>53.8</b>              | <b>21.0</b> | <b>25.2</b> | <b>67,704</b>  | <b>83.4</b>                       | <b>12.5</b> | <b>4.1</b> | <b>64.7</b>              | <b>19.4</b> | <b>15.9</b> |
| Any V                   | 12,710         | 73.1                              | 15.7        | 11.2       | 46.7                     | 21.0        | 32.3        | 35,003         | 82.6                              | 12.9        | 4.5        | 64.9                     | 19.4        | 15.7        |
| Any SH                  | 54,315         | 79.3                              | 13.9        | 6.8        | 51.2                     | 21.5        | 27.3        | 21,087         | 76.7                              | 15.8        | 7.5        | 57.0                     | 20.7        | 22.3        |
| Any DA                  | 66,255         | 81.8                              | 12.5        | 5.7        | 53.5                     | 21.1        | 25.4        | 39,264         | 80.9                              | 13.7        | 5.4        | 62.6                     | 19.6        | 17.8        |
| <b>Single adversity</b> | <b>19,194</b>  | <b>92.9</b>                       | <b>6.1</b>  | <b>1.0</b> | <b>61.2</b>              | <b>19.6</b> | <b>19.2</b> | <b>43,214</b>  | <b>87.6</b>                       | <b>10.2</b> | <b>2.2</b> | <b>68.5</b>              | <b>18.8</b> | <b>12.8</b> |
| V Only                  | 4,047          | 91.8                              | 6.7         | 1.5        | 57.6                     | 20.2        | 22.2        | 25,908         | 87.0                              | 10.7        | 2.3        | 68.1                     | 19.2        | 12.7        |
| SH Only                 | 2,114          | 90.8                              | 7.7         | 1.5        | 54.4                     | 20.8        | 24.8        | 2,188          | 87.6                              | 10.0        | 2.4        | 62.8                     | 19.6        | 17.6        |
| DA Only                 | 13,033         | 93.5                              | 5.7         | 0.8        | 63.4                     | 19.3        | 17.3        | 15,118         | 88.5                              | 9.4         | 2.1        | 69.9                     | 17.9        | 12.2        |

| Adolescent group*         | No. girls     | Girls (%)                         |             |            |                          |             |             | Boys (%)                          |             |             |                          |             |             |             |
|---------------------------|---------------|-----------------------------------|-------------|------------|--------------------------|-------------|-------------|-----------------------------------|-------------|-------------|--------------------------|-------------|-------------|-------------|
|                           |               | Emergency admission(s) for injury |             |            | Admission(s) of any type |             |             | Emergency admission(s) for injury |             |             | Admission(s) of any type |             |             |             |
|                           |               | 1                                 | 2           | 3+         | 1                        | 2           | 3+          | No. boys                          | 1           | 2           | 3+                       | 1           | 2           | 3+          |
| <b>Multiple adversity</b> | <b>53,574</b> | <b>79.0</b>                       | <b>14.2</b> | <b>6.9</b> | <b>51.1</b>              | <b>21.5</b> | <b>27.3</b> | <b>24,490</b>                     | <b>76.1</b> | <b>16.5</b> | <b>7.5</b>               | <b>58.0</b> | <b>20.7</b> | <b>21.4</b> |
| V + SH                    | 352           | 80.4                              | 14.8        | 4.8        | 49.7                     | 23.0        | 27.3        | 344                               | 71.8        | 21.8        | 6.4                      | 53.8        | 24.4        | 21.8        |
| V + DA                    | 1,373         | 84.6                              | 13.0        | 2.3        | 54.0                     | 22.4        | 23.6        | 5,591                             | 78.3        | 16.4        | 5.3                      | 63.4        | 20.1        | 16.5        |
| SH + DA                   | 44,911        | 81.8                              | 13.1        | 5.1        | 52.9                     | 21.6        | 25.5        | 15,395                            | 79.7        | 14.8        | 5.5                      | 59.1        | 21.0        | 19.8        |
| V + SH + DA               | 6,938         | 59.5                              | 21.5        | 19.0       | 38.7                     | 21.2        | 40.2        | 3,160                             | 54.8        | 24.2        | 21.0                     | 43.0        | 19.5        | 37.4        |
| No adversity              | 71,390        | 94.7                              | 4.5         | 0.8        | 61.4                     | 19.9        | 18.7        | 190,799                           | 92.7        | 6.4         | 0.9                      | 69.8        | 18.4        | 11.8        |
| <b>AccRI Only</b>         | <b>59,528</b> | <b>95.3</b>                       | <b>4.1</b>  | <b>0.6</b> | <b>66.6</b>              | <b>18.7</b> | <b>14.7</b> | <b>174,962</b>                    | <b>92.6</b> | <b>6.5</b>  | <b>0.9</b>               | <b>71.4</b> | <b>18.1</b> | <b>10.5</b> |
| <b>Other Causes</b>       | <b>11,862</b> | <b>91.6</b>                       | <b>6.3</b>  | <b>2.1</b> | <b>35.4</b>              | <b>25.8</b> | <b>38.7</b> | <b>15,837</b>                     | <b>93.4</b> | <b>5.0</b>  | <b>1.6</b>               | <b>51.7</b> | <b>22.1</b> | <b>26.2</b> |

256 V = Victimisation, SH = Self-harm, DA = Drug or Alcohol Misuse, AdvRI = Adversity-related Injury, AccRI Only = Accident-related  
 257 Injury Only.  
 258 \* Each adolescent classified by all adversities/accidents seen at any emergency admission(s) for injury between 10 and 19 years  
 259 old.

1  
2  
3 260 Similarly, a higher proportion of adolescents in the AdvRI group had  
4  
5 261 two more admissions of any type (including non-emergency and non-injury)  
6  
7 262 between 10 and 19 years old (girls 36.2%; boys 35.3%; Table 2) compared  
8  
9 263 with adolescents in the AccRI Only group (girls 33.4%; boys 28.6%). This  
10  
11 264 proportion was even higher for adolescents in the AdvRI group who were  
12  
13 265 admitted with multiple types of adversity (multiple types: girls 48.8%, boys  
14  
15 266 42.1%; single type: girls 38.8%, boys 31.6%).  
16  
17  
18  
19  
20  
21  
22  
23  
24  
25  
26  
27  
28  
29  
30  
31  
32  
33  
34  
35  
36  
37  
38  
39  
40  
41  
42  
43  
44  
45  
46  
47  
48  
49  
50  
51  
52  
53  
54  
55  
56  
57  
58  
59  
60

1  
2  
3 267 **DISCUSSION**

4  
5 268 More than one in 20 adolescents in England had at least one emergency  
6  
7 269 admission for adversity-related injury between 10 and 19 years old. These  
8  
9 270 adolescents accounted for a third of all adolescents with emergency  
10  
11 271 admissions for injury and for a disproportionate number of re-admissions for  
12  
13 272 injury, particularly adolescents admitted with multiple types of adversity-  
14  
15 273 related injury. Targeting adolescents admitted with adversity-related injury  
16  
17 274 could reduce their risk of future harm and the rate of re-admissions to  
18  
19 275 hospital, which are some of the most expensive types of healthcare and the  
20  
21 276 UK government is keen to reduce.[25]

22  
23  
24  
25 277 Longitudinally-linked admissions allowed us to study the entire ten  
26  
27 278 years of adolescence in 402 916 adolescents, to distinguish between types of  
28  
29 279 adversity that co-occurred during adolescence or at the same admission, and  
30  
31 280 to study re-admissions.

32  
33  
34 281 One weakness of this study was our reliance on diagnostic codes  
35  
36 282 recorded in administrative data. Maltreatment and drug or alcohol misuse  
37  
38 283 have been shown to be under-recorded using ICD-10,[26 27] but false  
39  
40 284 positives are rare.[15] To address under-recording, we used what we  
41  
42 285 considered to be sensitive clusters of codes for adversity. Other factors  
43  
44 286 related to recording or coding practices,[12 14 15 27 28] for example, new  
45  
46 287 guidelines for defining maltreatment,[14] can also affect ascertainment.  
47  
48 288 Because of the relative insensitivity but good specificity of the coding clusters,  
49  
50 289 some adolescents who were classified in the AccRI group may in fact belong  
51  
52 290 to the AdvRI group, but did not have their adversity recognised or recorded.  
53  
54 291 Consequently, our prevalence estimates of admission for different types of  
55  
56  
57  
58  
59  
60

1  
2  
3 292 adversity-related injury are likely to provide a lower bound for the true  
4  
5 293 prevalence.

6  
7 294 Our prevalence estimates of admission for injury related to individual  
8  
9 295 types of adversity from the general adolescent population are consistent with  
10  
11 296 previous reports for emergency admissions for assault-related injury in 2004-  
12  
13 297 2009 and for all admissions (emergency and non-emergency) for self-harm  
14  
15 298 and drug or alcohol misuse.[1 2 24 29] Previous studies have reported higher  
16  
17 299 rates of drug or alcohol misuse in boys than in girls in the general adolescent  
18  
19 300 population.[24] We found higher rates in girls. This difference could indicate  
20  
21 301 that girls exposed to drug or alcohol misuse are more likely to be injured,  
22  
23 302 present to hospital, or be admitted after presenting to hospital, as a result.  
24  
25 303 Our estimated rates of re-admission of any type (including non-emergency  
26  
27 304 and non-injury) for victimisation (girls 53.3%, boys 35.1%) (Table 2) and self-  
28  
29 305 harm (girls 48.8%, boys 43.0%) were higher than previously reported (11% for  
30  
31 306 victimisation, 33% for self-harm).[3 4] These discrepancies are likely to be  
32  
33 307 because we considered the whole ten years of adolescence and re-admission  
34  
35 308 of any type, whereas previous studies looked at re-attendance up to the  
36  
37 309 following year and for the same type of adversity-related injury.[3 4]

38  
39 310 The results of this study should inform policy initiatives and national  
40  
41 311 guidelines. Firstly, a substantial proportion of adolescents are affected by  
42  
43 312 adversity and they account for a large proportion (29.6-59.9%) of all  
44  
45 313 emergency admissions to hospital for injury in this age group. Secondly, we  
46  
47 314 show the large burden of injury admission for all three types of adversity, yet  
48  
49 315 there are currently no national clinical guidelines for managing assault.  
50  
51 316 Finally, these results show that adolescents often present with multiple types  
52  
53  
54  
55  
56  
57  
58  
59  
60

1  
2  
3 317 of adversity (especially in girls), even though guidelines exist only for  
4  
5 318 managing individual problems.[30-32]  
6

7 319 In addition, policy makers need to be aware of the widely varying  
8  
9 320 aetiological pathways to admission with adversity-related injury. Our  
10  
11 321 approach to defining this group of adolescents is not designed to reflect the  
12  
13 322 complexity or severity of these cases. For example, admission for multiple  
14  
15 323 types of adversity-related injury is a poor proxy indicator of severity. Effective  
16  
17 324 interventions will need to be tailored to the individual, based on specialist  
18  
19 325 clinical assessment. However, all three types of adversity are likely to reflect  
20  
21 326 a combination of underlying psychosocial need and environmental and social  
22  
23 327 stressors. This intervention may reduce the risk of future harm including the  
24  
25 328 incidence of other types of harm not seen in hospital, e.g., further adversity-  
26  
27 329 related injury not leading to admission, that are likely to be more frequent in  
28  
29 330 these adolescents, and which the hospital administrative data we used does  
30  
31 331 not capture. Further work in admissions data linked to other administrative  
32  
33 332 datasets, e.g., accident and emergency data, could tell us if the risk of these  
34  
35 333 other types of harm is also increased in adolescents admitted with adversity-  
36  
37 334 related injury.  
38  
39  
40  
41  
42  
43  
44  
45  
46  
47  
48  
49  
50  
51  
52  
53  
54  
55  
56  
57  
58  
59  
60



1  
2  
3  
4  
5 335 **Contributors**  
6

7 336 Annie Herbert - helped to conceive and design the study, analysed and  
8  
9 337 interpreted the data, drafted the article, revised it critically for important  
10  
11 338 intellectual content and approved the final version to be published.

12  
13 339 Leah Li - helped to conceive and design the study, interpreted the data,  
14  
15 340 revised the article critically for important intellectual content and approved the  
16  
17 341 final version to be published.

18  
19 342 Arturo González-Izquierdo - helped to conceive and design the study,  
20  
21 343 acquired and interpreted the data, revised the article critically for important  
22  
23 344 intellectual content and approved the final version to be published.

24  
25 345 Ruth Gilbert – helped to conceive and design the study, acquired and  
26  
27 346 interpreted the data, revised the article critically for important intellectual  
28  
29 347 content and approved the final version to be published.

30  
31 348  
32 349 **Competing interests** None.  
33

34  
35  
36 350

37  
38  
39 351 **Funding** AH was supported by the Policy Research Unit in the Health of  
40  
41 352 Children, Young People and Families, which is funded by the Department of  
42  
43 353 Health Policy Research Programme (grant reference number: 109/0001).  
44  
45 354 This report is an independent research commissioned by the Department of  
46  
47 355 Health. The views expressed in this publication are those of the authors and  
48  
49 356 not necessarily those of the Department of Health. AH is also supported by  
50  
51 357 the University College London Impact studentship. The study sponsors  
52  
53 358 played no part in the design, data analysis and interpretation of this study; the  
54  
55  
56  
57  
58  
59  
60

1  
2  
3 359 writing of the manuscript or the decision to submit the paper for publication,  
4  
5 360 and the authors' work was independent of their funders.  
6

7 361

8  
9 362 **Ethics** Both Hospital Episode Statistics (HES) admissions data and Office for  
10  
11 363 National Statistics (ONS) mid-year population estimates are derived from  
12  
13 364 routinely collected administrative data. HES data were pseudonymised  
14  
15  
16 365 before we received them and therefore we did not require Research Ethics  
17  
18 366 Committee approval.  
19

20 367

21  
22  
23 368 **Data sharing** No additional data available.  
24  
25  
26  
27  
28  
29  
30  
31  
32  
33  
34  
35  
36  
37  
38  
39  
40  
41  
42  
43  
44  
45  
46  
47  
48  
49  
50  
51  
52  
53  
54  
55  
56  
57  
58  
59  
60

## 369 REFERENCES

1. Bellis MA, Hughes K, Wood S, et al. National five-year examination of inequalities and trends in emergency hospital admission for violence across England. *Injury prevention : journal of the International Society for Child and Adolescent Injury Prevention* 2011;**17**(5):319-25 doi: 10.1136/ip.2010.030486[published Online First: Epub Date]].
2. Hawton K, Rodham K, Evans E, et al. Deliberate self harm in adolescents: self report survey in schools in England. *Bmj* 2002;**325**(7374):1207-11
3. Meuleners LB, Lee AH, Hendrie D. Interpersonal violence hospitalisations for adolescents: A population-based study. *Journal of paediatrics and child health* 2010;**46**(11):686-90 doi: 10.1111/j.1440-1754.2010.01818.x[published Online First: Epub Date]].
4. Lilley R, Owens D, Horrocks J, et al. Hospital care and repetition following self-harm: multicentre comparison of self-poisoning and self-injury. *The British Journal of Psychiatry* 2008;**192**(6):440-45
5. Snider C, Lee J. Youth violence secondary prevention initiatives in emergency departments: a systematic review. *Cjem* 2009;**11**(2):161-8
6. Ougrin D, Boege I, Stahl D, et al. Randomised controlled trial of therapeutic assessment versus usual assessment in adolescents with self-harm: 2-year follow-up. *Archives of disease in childhood* 2013;**98**(10):772-6 doi: 10.1136/archdischild-2012-303200[published Online First: Epub Date]].
7. Crawford MJ, Patton R, Touquet R, et al. Screening and referral for brief intervention of alcohol-misusing patients in an emergency department: a pragmatic randomised controlled trial. *The Lancet*; **364**(9442):1334-39 doi: [http://dx.doi.org/10.1016/S0140-6736\(04\)17190-0](http://dx.doi.org/10.1016/S0140-6736(04)17190-0)[published Online First: Epub Date]].
8. Johnson SB, Bradshaw CP, Wright JL, et al. Characterizing the teachable moment: is an emergency department visit a teachable moment for intervention among assault-injured youth and their parents? *Pediatric emergency care* 2007;**23**(8):553-59
9. Inpatient HES Data Dictionary. Leeds: Health and Social Care Information Centre, 2010.

- 1  
2  
3 409 10. World Health Organisation. Adolescent Health. Secondary  
4 410 Adolescent Health 2013.  
5 411 [http://www.who.int/topics/adolescent\\_health/en/](http://www.who.int/topics/adolescent_health/en/).  
6  
7 412 11. National Health Service Act, 2006.  
8  
9 413 12. Gonzalez-Izquierdo A, Woodman J, Copley L, et al. Variation in  
10 414 recording of child maltreatment in administrative records of  
11 415 hospital admissions for injury in England, 1997-2009. Archives  
12 416 of disease in childhood 2010;**95**(11):918-25 doi:  
13 417 10.1136/adc.2009.180216[published Online First: Epub Date]].  
14  
15 418 13. International Statistical Classification of Diseases and Related  
16 419 Health Problems 10th Revision. Secondary International  
17 420 Statistical Classification of Diseases and Related Health  
18 421 Problems 10th Revision.  
19 422 <http://apps.who.int/classifications/icd10/browse/2010/en>.  
20  
21 423 14. Saperia J, Lakhanpaul M, Kemp A, et al. When to suspect child  
22 424 maltreatment: summary of NICE guidance. Bmj  
23 425 2009;**339**:b2689 doi: 10.1136/bmj.b2689[published Online  
24 426 First: Epub Date]].  
25  
26 427 15. Gonzalez-Izquierdo A, Ward A, M OD, et al. Cross-country  
27 428 comparison of victimisation-related injury admission in  
28 429 children and adolescents in England and Western Australia.  
29 430 BMC Health Serv Res 2013;**13**(1):260 doi: 10.1186/1472-  
30 431 6963-13-260[published Online First: Epub Date]].  
31  
32 432 16. Patton GC, Viner R. Pubertal transitions in health. Lancet  
33 433 2007;**369**(9567):1130-9 doi: 10.1016/S0140-6736(07)60366-  
34 434 3[published Online First: Epub Date]].  
35  
36 435 17. Gill T. How old are GCSE candidates? Statistics Report Series,  
37 436 2010.  
38  
39 437 18. Directgov. AS and A levels. Secondary AS and A levels 2012.  
40 438 <http://webarchive.nationalarchives.gov.uk/20121015000000/>  
41 439 [http://www.direct.gov.uk/en/EducationAndLearning/Qualific](http://www.direct.gov.uk/en/EducationAndLearning/QualificationsExplained/DG_10039018)  
42 440 [ationsExplained/DG\\_10039018](http://www.direct.gov.uk/en/EducationAndLearning/QualificationsExplained/DG_10039018).  
43  
44 441 19. Buying Alcohol. Secondary Buying Alcohol 2013.  
45 442 [https://www.drinkaware.co.uk/check-the-facts/alcohol-and-](https://www.drinkaware.co.uk/check-the-facts/alcohol-and-the-law/buying-alcohol)  
46 443 [the-law/buying-alcohol](https://www.drinkaware.co.uk/check-the-facts/alcohol-and-the-law/buying-alcohol).  
47  
48 444 20. All releases of Population Estimates for UK, England and Wales,  
49 445 Scotland and Northern Ireland: Office for National Statistics,  
50 446 2013.  
51  
52 447 21. Office for National Statistics. Mid-year population estimates short  
53 448 methods guide: Office for National Statistics, 2010.  
54  
55 449 22. Radford L. Child abuse and neglect in the UK today. NSPCC  
56 450 Research: NSPCC, 2011.  
57  
58  
59  
60

- 1  
2  
3 451 23. *Truth hurts: report of the national inquiry into self-harm among*  
4 452 *young people*. London: Mental Health Foundation, 2006.  
5  
6 453 24. Hibell B, Guttormsson U, Ahlström S, et al. The 2011 ESPAD  
7 454 Report. Substance use among students in 2012;**36**  
8  
9 455 25. National Audit Office. Emergency admissions to hospital:  
10 456 managing the demand, 2013.  
11 457 26. Scott D, Tonmyr L, Fraser J, et al. The utility and challenges of  
12 458 using ICD codes in child maltreatment research: A review of  
13 459 existing literature. *Child abuse & neglect* 2009;**33**(11):791-808  
14 460 doi: S0145-2134(09)00202-6 [pii]  
15 461 10.1016/j.chiabu.2009.08.005[published Online First: Epub Date]].  
16  
17 462 27. McKenzie K, Harrison JE, McClure RJ. Identification of alcohol  
18 463 involvement in injury-related hospitalisations using routine  
19 464 data compared to medical record review. *Australian and New*  
20 465 *Zealand journal of public health* 2010;**34**(2):146-52 doi:  
21 466 10.1111/j.1753-6405.2010.00499.x[published Online First:  
22 467 Epub Date]].  
23  
24 468 28. Farrar S, Yi D, Sutton M, et al. Has payment by results affected the  
25 469 way that English hospitals provide care? Difference-in-  
26 470 differences analysis. *Bmj* 2009;**339** doi:  
27 471 10.1136/bmj.b3047[published Online First: Epub Date]].  
28  
29 472 29. Hawton K, Rodham K, Evans E, et al. Adolescents Who Self Harm:  
30 473 A Comparison of Those Who Go to Hospital and Those Who Do  
31 474 Not. *Child Adol Ment H-Uk* 2009;**14**(1):24-30 doi: DOI  
32 475 10.1111/j.1475-3588.2008.00485.x[published Online First:  
33 476 Epub Date]].  
34  
35 477 30. *Self-harm. The short term physical and psychological management*  
36 478 *and secondary prevention of self-harm in primary and secondary*  
37 479 *care*. London: National Institute for Health and Clinical  
38 480 Excellence, 2011.  
39  
40 481 31. *Drug misuse: Psychosocial interventions*. London: National  
41 482 Institute for Health and Clinical Excellence, 2007.  
42  
43 483 32. *Alcohol-use disorder : diagnosis, assessment and management of*  
44 484 *harmful drinking and alcohol dependence*. London: National  
45 485 Institute for Health and Clinical Excellence, 2011.

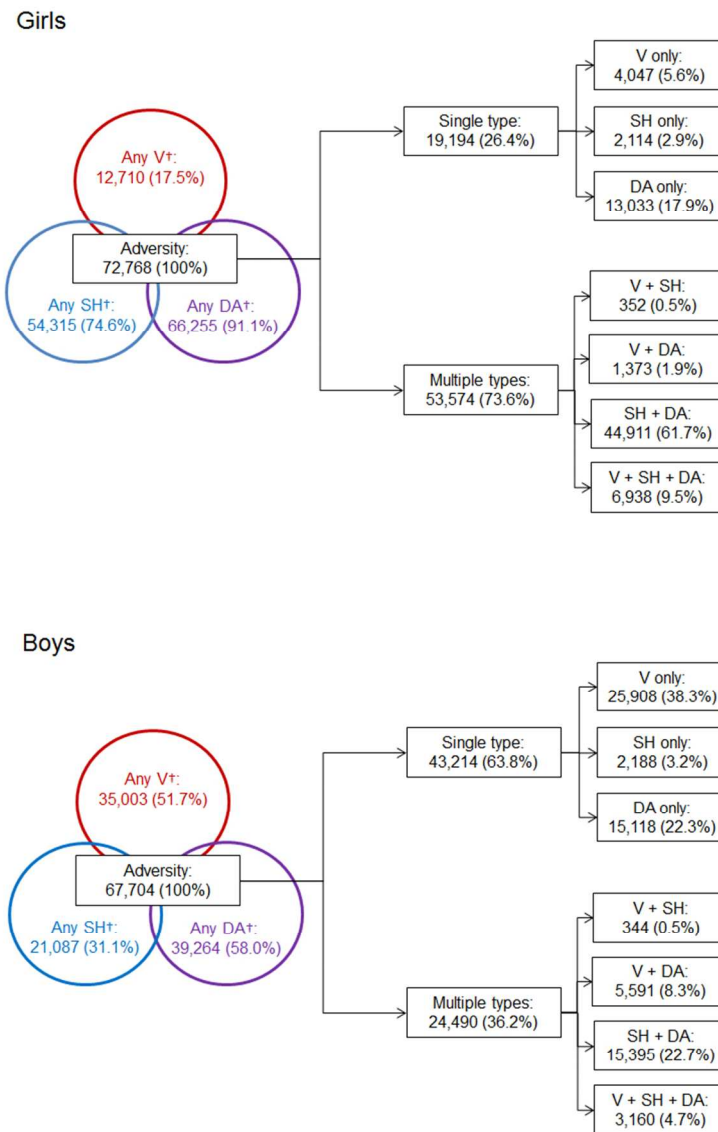

Figure 1. Number (%) of adolescents with adversity-related injury, by types of adversity between 10 and 19 years old\* and sex.

V = victimisation, SH = self-harm, DA = drug or alcohol misuse

\*Each adolescent classified by all adversity recorded at any emergency admission(s) for injury between 10 and 19 years old.

†'Any V', 'Any SH' and 'Any DA' are not mutually exclusive.  
214x315mm (96 x 96 DPI)

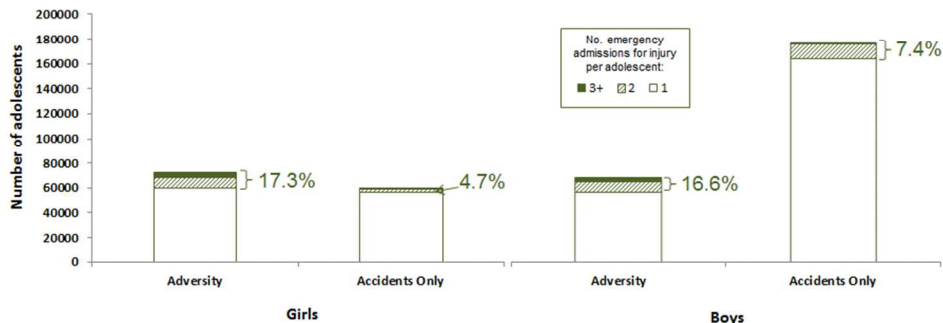

Figure 2. Number of adolescents with 1, 2 and 3 or more emergency admission(s) for injury between 10 and 19 years old\*, by types of injury between 10 and 19 years old† and sex

AdvRI = Adversity-related Injury, AccRI Only = Accident-related Injury Only

\*Percentages are of adolescents who have 2 or more emergency admissions for injury between 10-19 years old.

†Each adolescent classified by all adversity/accidents recorded at any emergency admission(s) for injury.  
251x104mm (96 x 96 DPI)

Review only

## Supplementary Tables

**Supplementary Table 1.** Cohort (shaded) who have at least one emergency admission for injury between 10 and 19 years old in 1998-2011 (N = 402,916)

| 1998 | 1999 | 2000 | 2001 | 2002 | ... | 2007 | 2008 | 2009 | 2010 | 2011 |
|------|------|------|------|------|-----|------|------|------|------|------|
| 6    | 7    | 8    | 9    | 10   | ... | 15   | 16   | 17   | 18   | 19   |
| 7    | 8    | 9    | 10   | 11   | ... | 16   | 17   | 18   | 19   | 20   |
| 8    | 9    | 10   | 11   | 12   | ... | 17   | 18   | 19   | 20   | 21   |
| 9    | 10   | 11   | 12   | 13   | ... | 18   | 19   | 20   | 21   | 22   |
| 10   | 11   | 12   | 13   | 14   | ... | 19   | 20   | 21   | 22   | 23   |



**Supplementary Table 2.** Definitions and International Classification of Diseases (ICD-10) diagnostic codes used to classify emergency admissions for injury, chronic conditions and types of adversity\*

---

## ADMISSIONS AND ADMISSION TYPES

---

### Admission

Admissions were defined by linked episodes of inpatient care, including day cases (any case > 4 hours stay). Any admission which occurred within one day or was a hospital transfer from a previous admission was considered to be the same admission. An episode may have up to 20 diagnosis codes entered, but 88% of admissions in this cohort had episodes with four or less diagnoses recorded (data not shown).

### Emergency (acute; unplanned) admission

An admission was considered to be an emergency if the method of admission variable ('admimeth') was 21-24 or 28.(1)

### Injury

An admission was considered to be for injury if any of the diagnosis codes in the first episode of the admission were S or T codes (Chapter XIX of the ICD -10).

---

## CHRONIC CONDITIONS

---

ICD-10 codes as per Hardelid et al, 2013,(2) excluding E24.4, F10-F19, G31.2, G40.5, G62.1, G72.1, K29.2, K70, K85.2, K86.0, O35.4, R78.1-R78.5, Z50.2, Z50.3, Z86.4, X64-X84, Y10-Y34, Z91.5, F30.0-F30.2, F30.8-F32.3, F32.8-F334, F33.8-F34.1, F34.8-F34.9, F38.0-F38.1, F38.8, F39-F40.2, F40.8- F41.3, F41.8-F41.9.

---

## ADVERSITY CLUSTERS AND DESCRIPTIONS\*

## ICD-10 CODES

---

### Victimisation

#### *Maltreatment*

Maltreatment syndromes

T74

|    |                                                              |                      |
|----|--------------------------------------------------------------|----------------------|
| 1  |                                                              |                      |
| 2  |                                                              |                      |
| 3  | Effects of other deprivation (extreme neglect)               | T73                  |
| 4  |                                                              |                      |
| 5  | Perpetrator of neglect and other maltreatment syndromes      | Y06, Y07             |
| 6  |                                                              |                      |
| 7  | <i>Assault</i>                                               |                      |
| 8  |                                                              |                      |
| 9  | Assault by bodily force and sexual assault                   | Y04, Y05             |
| 10 |                                                              |                      |
| 11 | Other types of assault                                       | X85 - Y03, Y08 - Y09 |
| 12 |                                                              |                      |
| 13 |                                                              |                      |
| 14 | <i>Undetermined cause</i>                                    |                      |
| 15 |                                                              |                      |
| 16 | Events of undetermined intent                                | Y20 - Y34            |
| 17 |                                                              |                      |
| 18 | Examination and observation following other inflicted injury | Z04.5                |
| 19 |                                                              |                      |
| 20 | Examination and observation for other reasons: request       |                      |
| 21 |                                                              | Z04.8                |
| 22 |                                                              |                      |
| 23 | for expert evidence                                          |                      |
| 24 |                                                              |                      |
| 25 | <i>Adverse social circumstances</i>                          |                      |
| 26 |                                                              |                      |
| 27 | Neonatal withdrawal symptoms from maternal use of            |                      |
| 28 |                                                              | P96.1                |
| 29 | drugs of addiction                                           |                      |
| 30 |                                                              |                      |
| 31 |                                                              |                      |
| 32 | Other problems related to physical environment               | Z58.8                |
| 33 |                                                              |                      |
| 34 | Problem related to physical environment, unspecified         | Z58.9                |
| 35 |                                                              |                      |
| 36 | Homelessness                                                 | Z59.0                |
| 37 |                                                              |                      |
| 38 | Inadequate housing                                           | Z59.1                |
| 39 |                                                              |                      |
| 40 | Lack of adequate food                                        | Z59.4                |
| 41 |                                                              |                      |
| 42 |                                                              |                      |
| 43 | Extreme poverty                                              | Z59.5                |
| 44 |                                                              |                      |
| 45 | Insufficient social insurance and welfare support            | Z59.7                |
| 46 |                                                              |                      |
| 47 | Problem related to housing and economic circumstances,       |                      |
| 48 |                                                              | Z59.9                |
| 49 | unspecified                                                  |                      |
| 50 |                                                              |                      |
| 51 |                                                              |                      |
| 52 | Problems related to social environment                       | Z60                  |
| 53 |                                                              |                      |
| 54 | Problems related to negative life events in childhood        | Z61                  |
| 55 |                                                              |                      |
| 56 | Other problems related to upbringing                         | Z62                  |
| 57 |                                                              |                      |
| 58 |                                                              |                      |
| 59 |                                                              |                      |
| 60 |                                                              |                      |

|    |                                                         |               |
|----|---------------------------------------------------------|---------------|
| 1  |                                                         |               |
| 2  |                                                         |               |
| 3  | Other problems related to primary support group         | Z63           |
| 4  |                                                         |               |
| 5  | Discord with counsellors                                | Z64.4         |
| 6  |                                                         |               |
| 7  | Problems related to other legal circumstances           | Z65.3         |
| 8  |                                                         |               |
| 9  | Other specified problems related to psychosocial        |               |
| 10 |                                                         |               |
| 11 |                                                         | Z65.8         |
| 12 | circumstances                                           |               |
| 13 |                                                         |               |
| 14 | Problem related to unspecified psychosocial             |               |
| 15 |                                                         | Z65.9         |
| 16 | circumstances                                           |               |
| 17 |                                                         |               |
| 18 | Problems related to lifestyle                           | Z72.3 - Z72.9 |
| 19 |                                                         |               |
| 20 | Problems related to care-provider dependency            | Z74           |
| 21 |                                                         |               |
| 22 | Health supervision and care of foundling                | Z76.1         |
| 23 |                                                         |               |
| 24 | Health supervision and care of other healthy infant and |               |
| 25 |                                                         |               |
| 26 |                                                         | Z76.2         |
| 27 | child                                                   |               |
| 28 |                                                         |               |
| 29 | Family history of mental and behavioural disorders      | Z81           |
| 30 |                                                         |               |
| 31 | Personal history of other specified risk-factors, not   |               |
| 32 |                                                         | Z91.8         |
| 33 | elsewhere classified                                    |               |
| 34 |                                                         |               |
| 35 |                                                         |               |
| 36 |                                                         |               |
| 37 |                                                         |               |

### Self-harm

|    |                                                         |         |
|----|---------------------------------------------------------|---------|
| 38 |                                                         |         |
| 39 |                                                         |         |
| 40 | <i>Intentional self-poisoning by and exposure to...</i> |         |
| 41 |                                                         |         |
| 42 | ...drugs                                                | X60-X63 |
| 43 |                                                         |         |
| 44 | ...other and unspecified drugs, medicaments and         |         |
| 45 |                                                         | X64     |
| 46 | biological substances                                   |         |
| 47 |                                                         |         |
| 48 | ...alcohol                                              | X65     |
| 49 |                                                         |         |
| 50 | ...organic solvents and halogenated hydrocarbons and    |         |
| 51 |                                                         | X66     |
| 52 | their vapours                                           |         |
| 53 |                                                         |         |
| 54 | ...other gases and vapours                              | X67     |
| 55 |                                                         |         |
| 56 |                                                         |         |
| 57 |                                                         |         |
| 58 |                                                         |         |
| 59 |                                                         |         |
| 60 |                                                         |         |

|    |                                                           |         |
|----|-----------------------------------------------------------|---------|
| 1  |                                                           |         |
| 2  |                                                           |         |
| 3  | ...pesticides                                             | X68     |
| 4  |                                                           |         |
| 5  | ...other and unspecified chemicals and noxious            |         |
| 6  |                                                           | X69     |
| 7  | substances                                                |         |
| 8  |                                                           |         |
| 9  | <i>Intentional self-harm by...</i>                        |         |
| 10 |                                                           |         |
| 11 | ...hanging, strangulation and suffocation                 | X70     |
| 12 |                                                           |         |
| 13 | ...drowning and submersion                                | X71     |
| 14 |                                                           |         |
| 15 | ...firearm discharge                                      | X72-X74 |
| 16 |                                                           |         |
| 17 | ...explosive material                                     | X75     |
| 18 |                                                           |         |
| 19 | ...smoke, fire and flames, or steam, hot vapours and hot  |         |
| 20 |                                                           | X76-X77 |
| 21 | objects                                                   |         |
| 22 |                                                           |         |
| 23 | ...sharp/blunt objects                                    | X78-X79 |
| 24 |                                                           |         |
| 25 | ...jumping from a high place                              | X80     |
| 26 |                                                           |         |
| 27 | ...jumping or lying before a moving object, or crashing a |         |
| 28 |                                                           | X81-82  |
| 29 | motor vehicle                                             |         |
| 30 |                                                           |         |
| 31 | ...other specified means                                  | X83     |
| 32 |                                                           |         |
| 33 | ...unspecified means                                      | X84     |
| 34 |                                                           |         |
| 35 | <i>Personal history of self-harm</i>                      | Z91.5   |
| 36 |                                                           |         |
| 37 |                                                           |         |
| 38 |                                                           |         |
| 39 |                                                           |         |
| 40 |                                                           |         |
| 41 |                                                           |         |
| 42 | <b>Alcohol/drug misuse</b>                                |         |
| 43 |                                                           |         |
| 44 | <i>Alcohol</i>                                            |         |
| 45 |                                                           |         |
| 46 | Alcohol-induced pseudo-Cushing's syndrome                 | E24.4   |
| 47 |                                                           |         |
| 48 | Mental and behavioural disorders due to use of alcohol    | F10     |
| 49 |                                                           |         |
| 50 | Degeneration of nervous system due to alcohol             | G31.2   |
| 51 |                                                           |         |
| 52 | Alcoholic polyneuropathy                                  | G62.1   |
| 53 |                                                           |         |
| 54 | Alcoholic myopathy                                        | G72.1   |
| 55 |                                                           |         |
| 56 |                                                           |         |
| 57 |                                                           |         |
| 58 |                                                           |         |
| 59 |                                                           |         |
| 60 |                                                           |         |

|    |                                                                     |                |
|----|---------------------------------------------------------------------|----------------|
| 1  |                                                                     |                |
| 2  |                                                                     |                |
| 3  | Alcoholic cardiomyopathy                                            | I42.1          |
| 4  |                                                                     |                |
| 5  | Alcoholic gastritis                                                 | K29.2          |
| 6  |                                                                     |                |
| 7  | Alcoholic liver disease                                             | K70            |
| 8  |                                                                     |                |
| 9  |                                                                     |                |
| 10 | Alcohol-induced acute pancreatitis                                  | K85.2          |
| 11 |                                                                     |                |
| 12 | Alcohol-induced chronic pancreatitis                                | K86.0          |
| 13 |                                                                     |                |
| 14 | Maternal care for (suspected) damage to fetus from                  |                |
| 15 |                                                                     | O35.4          |
| 16 | alcohol                                                             |                |
| 17 |                                                                     |                |
| 18 | Fetus and newborn affected by maternal use of alcohol <sup>†</sup>  | P04.3          |
| 19 |                                                                     |                |
| 20 | Fetal alcohol syndrome (dysmorphic) <sup>†</sup>                    | Q86.0          |
| 21 |                                                                     |                |
| 22 |                                                                     |                |
| 23 | Finding of alcohol in blood                                         | R78.0          |
| 24 |                                                                     |                |
| 25 | Poisoning: antidotes and chelating agents, not elsewhere            |                |
| 26 |                                                                     | T50.6          |
| 27 | classified                                                          |                |
| 28 |                                                                     |                |
| 29 | Toxic effect of alcohol                                             | T51            |
| 30 |                                                                     |                |
| 31 | Accidental poisoning by exposure to alcohol                         | X45            |
| 32 |                                                                     |                |
| 33 |                                                                     |                |
| 34 | <del>Intentional self poisoning by and exposure to alcohol**</del>  | <del>X65</del> |
| 35 |                                                                     |                |
| 36 | Poisoning by exposure to alcohol, undetermined intent               | Y15            |
| 37 |                                                                     |                |
| 38 | Evidence of alcohol involvement determined by blood                 |                |
| 39 |                                                                     | Y90            |
| 40 |                                                                     |                |
| 41 | alcohol level                                                       |                |
| 42 |                                                                     |                |
| 43 | Evidence of alcohol involvement determined by level of              |                |
| 44 |                                                                     | Y91            |
| 45 | intoxication <sup>‡</sup>                                           |                |
| 46 |                                                                     |                |
| 47 | Alcohol rehabilitation                                              | Z50.2          |
| 48 |                                                                     |                |
| 49 | Alcohol abuse counselling and surveillance                          | Z71.4          |
| 50 |                                                                     |                |
| 51 | Alcohol use <sup>‡</sup>                                            | Z72.1          |
| 52 |                                                                     |                |
| 53 |                                                                     |                |
| 54 | <i>Drugs, medicaments and biological substances (illicit drugs)</i> |                |
| 55 |                                                                     |                |
| 56 | Mental and behavioural disorders due to psychoactive                | F11 - F17, F19 |
| 57 |                                                                     |                |
| 58 |                                                                     |                |
| 59 |                                                                     |                |
| 60 |                                                                     |                |

1  
2  
3 substance use

4  
5 Maternal care for (suspected) damage to fetus by drugs<sup>†</sup> O35.5

6  
7 Neonatal jaundice due to drugs or toxins transmitted from  
8  
9 mother or given to newborn<sup>†</sup> P58.4

10  
11 Neonatal withdrawal symptoms from maternal use of  
12  
13 drugs of addiction<sup>†</sup> P96.1

14  
15 Finding of drugs not normally found in blood R78.1 - R78.5

16  
17 Poisoning by drugs, medicaments and biological T36 - T50

18  
19 substances (not inc. T50.6)

20  
21 Intentional self poisoning by and exposure to antiepileptic,  
22  
23 sedative-hypnotic, antiparkinsonism and psychotropic drugs,  
24  
25 not elsewhere classified\*\* X61

26  
27 Intentional self poisoning by and exposure to other drugs  
28  
29 acting on the autonomic nervous system\*\* X63

30  
31 Intentional self poisoning by and exposure to other and  
32  
33 unspecified drugs, medicaments and biological substances\*\* X64

34  
35 Assault by drugs, medicaments and biological substances<sup>§</sup> X85

36  
37 Poisoning, undetermined intent Y10 - Y14

38  
39 Drug rehabilitation Z50.3

40  
41 Drug abuse counselling and surveillance Z71.5

42  
43 Drug use Z72.2

44  
45 *Environmental/ Domestic substances*

46  
47 Mental and behavioural disorders due to use of volatile  
48  
49 solvents F18

50  
51 Accidental poisoning by and exposure to noxious X40 – X44, X46 - X49

|    |                                                                                |           |
|----|--------------------------------------------------------------------------------|-----------|
| 1  |                                                                                |           |
| 2  |                                                                                |           |
| 3  | substances                                                                     |           |
| 4  |                                                                                |           |
| 5  | Intentional self-poisoning by and exposure to organic                          |           |
| 6  |                                                                                | X66       |
| 7  | <del>solvents and halogenated hydrocarbons and their vapours<sup>†</sup></del> |           |
| 8  |                                                                                |           |
| 9  | Intentional self-poisoning by and exposure to noxious                          |           |
| 10 |                                                                                | X69       |
| 11 | substances                                                                     |           |
| 12 |                                                                                |           |
| 13 |                                                                                |           |
| 14 | <del>Assault by unspecified chemical or noxious substance<sup>§</sup></del>    | X90       |
| 15 |                                                                                |           |
| 16 | Poisoning by chemical or noxious substance,                                    |           |
| 17 |                                                                                | Y16 - Y19 |
| 18 | undetermined intent                                                            |           |
| 19 |                                                                                |           |
| 20 |                                                                                |           |
| 21 | <i>Codes mentioning both alcohol and drugs</i>                                 |           |
| 22 |                                                                                |           |
| 23 | Special epileptic syndromes - (related to alcohol, drugs,                      |           |
| 24 |                                                                                | G40.5     |
| 25 | etc.)                                                                          |           |
| 26 |                                                                                |           |
| 27 | Blood-alcohol and blood-drug test                                              | Z04.0     |
| 28 |                                                                                |           |
| 29 |                                                                                |           |
| 30 | <del>Personal history of psychoactive substance abuse—</del>                   |           |
| 31 |                                                                                | Z86.4     |
| 32 | (alcohol, drug, tobacco) <sup>***</sup>                                        |           |
| 33 |                                                                                |           |
| 34 |                                                                                |           |
| 35 |                                                                                |           |
| 36 | <b>Accidents</b>                                                               |           |
| 37 |                                                                                |           |
| 38 | Transport accidents                                                            | V01 - V99 |
| 39 |                                                                                |           |
| 40 | Falls                                                                          | W00 - W19 |
| 41 |                                                                                |           |
| 42 | Exposure to inanimate mechanical forces                                        | W20 - W49 |
| 43 |                                                                                |           |
| 44 | Exposure to animate mechanical forces                                          | W50 - W64 |
| 45 |                                                                                |           |
| 46 | Accidental drowning and submersion                                             | W65 - W74 |
| 47 |                                                                                |           |
| 48 | Other accidental threats to breathing                                          | W75 - W84 |
| 49 |                                                                                |           |
| 50 | Exposure to electric current, radiation and extreme                            |           |
| 51 |                                                                                | W85 - W99 |
| 52 | ambient air temperature and pressure                                           |           |
| 53 |                                                                                |           |
| 54 | Exposure to smoke, fire and flames                                             | X00 - X09 |
| 55 |                                                                                |           |
| 56 |                                                                                |           |
| 57 |                                                                                |           |
| 58 |                                                                                |           |
| 59 |                                                                                |           |
| 60 |                                                                                |           |

|    |                                                      |           |
|----|------------------------------------------------------|-----------|
| 1  |                                                      |           |
| 2  |                                                      |           |
| 3  | Contact with heat and hot substances                 | X10 - X19 |
| 4  |                                                      |           |
| 5  | Contact with venomous animals and plants             | X20 - X29 |
| 6  |                                                      |           |
| 7  | Exposure to forces of nature                         | X30 - X39 |
| 8  |                                                      |           |
| 9  | Accidental poisoning by and exposure to noxious      |           |
| 10 |                                                      |           |
| 11 |                                                      | X40 - X49 |
| 12 | substances                                           |           |
| 13 |                                                      |           |
| 14 | Overexertion, travel and privation                   | X50 - X57 |
| 15 |                                                      |           |
| 16 | Accidental exposure to other and unspecified factors | X58 - X59 |
| 17 |                                                      |           |

---

\* 'Strikethrough' (~~Phrase, code~~) indicates that this was not included in the adversity definition.

† Codes relating to foetuses or neonates (P04.3, Q86.0, P58.4 and P96) were not expected in adolescent presentations; this was checked and did not appear.

\*\* Formed part of the self-harm cluster only; self-poisoning considered most egregious element of diagnosis.

‡ If subject under 18 years old.

§ Formed part of the victimisation cluster only; assault considered most egregious element of the diagnosis.

\*\*\*Not possible to distinguish whether for drugs, alcohol or tobacco



**Supplementary Table 3.** Population prevalence\* of emergency admission(s) for injury, by types of adversity within age periods† and sex

| Adolescent group†           | All girls   | All boys     | Girls       |              |              | Boys         |               |               |
|-----------------------------|-------------|--------------|-------------|--------------|--------------|--------------|---------------|---------------|
|                             | 10-19y      | 10-19y       | 10-14y      | 15-17y       | 18-19y       | 10-14y       | 15-17y        | 18-19y        |
| All                         | 8.66        | 16.27‡       | 3.92        | 3.12§        | 2.11§        | 7.67‡        | 5.29‡§        | 0.40‡§        |
| <b>AdvRI</b>                | <b>4.37</b> | <b>4.26‡</b> | <b>1.31</b> | <b>2.04§</b> | <b>1.27§</b> | <b>0.72‡</b> | <b>1.53‡§</b> | <b>1.74‡§</b> |
| Any Victimization           | 0.76        | 2.20‡        | 0.25        | 0.31§        | 0.19§        | 0.33‡        | 0.80‡§        | 0.90‡§        |
| Any Self-harm               | 3.26        | 1.33‡        | 0.90        | 1.58§        | 0.97§        | 0.22‡        | 0.47‡§        | 0.55‡§        |
| Any Drug or Alcohol Misuse  | 3.98        | 2.47‡        | 1.16        | 1.87§        | 1.15§        | 0.39‡        | 0.84‡§        | 1.01‡§        |
| <b>Single adversity</b>     | <b>1.15</b> | <b>2.72‡</b> | <b>0.44</b> | <b>0.49§</b> | <b>0.32§</b> | <b>0.53‡</b> | <b>0.99‡§</b> | <b>1.08‡§</b> |
| Victimization Only          | 0.24        | 1.63‡        | 0.09        | 0.10§        | 0.08§        | 0.28‡        | 0.64‡§        | 0.69‡§        |
| Self-harm Only              | 0.13        | 0.14         | 0.05        | 0.06§        | 0.03§        | 0.05         | 0.04‡§        | 0.04‡         |
| Drug or Alcohol Misuse Only | 0.78        | 0.95‡        | 0.29        | 0.33§        | 0.21§        | 0.21‡        | 0.31‡§        | 0.35‡§        |

| Adolescent group†         | All girls   | All boys      | Girls       |              |              | Boys         |               |               |
|---------------------------|-------------|---------------|-------------|--------------|--------------|--------------|---------------|---------------|
|                           | 10-19y      | 10-19y        | 10-14y      | 15-17y       | 18-19y       | 10-14y       | 15-17y        | 18-19y        |
| <b>Multiple adversity</b> | <b>3.22</b> | <b>1.54‡</b>  | <b>0.88</b> | <b>1.55§</b> | <b>0.95§</b> | <b>0.19‡</b> | <b>0.54‡§</b> | <b>0.66‡§</b> |
| V+SH                      | 0.02        | 0.02          | 0.01        | 0.01         | 0.004§       | 0.005‡       | 0.01§         | 0.01‡         |
| V+DA                      | 0.08        | 0.35‡         | 0.03        | 0.03         | 0.02§        | 0.02‡        | 0.11‡§        | 0.15‡§        |
| SH+DA                     | 2.70        | 0.97‡         | 0.72        | 1.34§        | 0.84§        | 0.14‡        | 0.37‡§        | 0.45‡§        |
| V+SH+DA                   | 0.42        | 0.20‡         | 0.12        | 0.17§        | 0.09§        | 0.02‡        | 0.05‡§        | 0.06‡§        |
| No adversity              | 4.29        | 12.01‡        | 2.79        | 1.08§        | 0.84§        | 6.95‡        | 3.76‡§        | 2.26‡§        |
| <b>AccRI Only</b>         | <b>0.71</b> | <b>1.00‡</b>  | <b>0.32</b> | <b>0.26§</b> | <b>0.24§</b> | <b>0.47‡</b> | <b>0.36‡§</b> | <b>0.31‡§</b> |
| <b>Other Causes</b>       | <b>3.58</b> | <b>11.01‡</b> | <b>2.47</b> | <b>0.82§</b> | <b>0.60§</b> | <b>6.48‡</b> | <b>3.40‡§</b> | <b>1.95‡§</b> |

V = Victimisation, SH = Self-harm, DA = Drug or Alcohol Misuse, AdvRI = Adversity-related Injury, AccRI Only = Accident-related Injury Only

\*Due to large denominators, confidence intervals for population prevalence were too narrow to provide any meaningful interpretation and so are not shown.

†Each adolescent classified by all adversity/accidents seen at any emergency injury admission(s) at 10-19 years, 10-14 years, 15-17 years and 18-19 years, respectively.

‡Statistically significantly different from girls of the same age (according to 95% confidence intervals).

§Statistically significantly different from 10-14 year olds of the same sex (according to 95% confidence intervals).

**REFERENCES**

1. Inpatient HES Data Dictionary. Leeds: Health and Social Care Information Centre, 2010.
2. Hardelid P DN, Davey J, Primbramska I, Gilbert R. Overview of child deaths in the four UK countries. London: 2013.

For peer review only

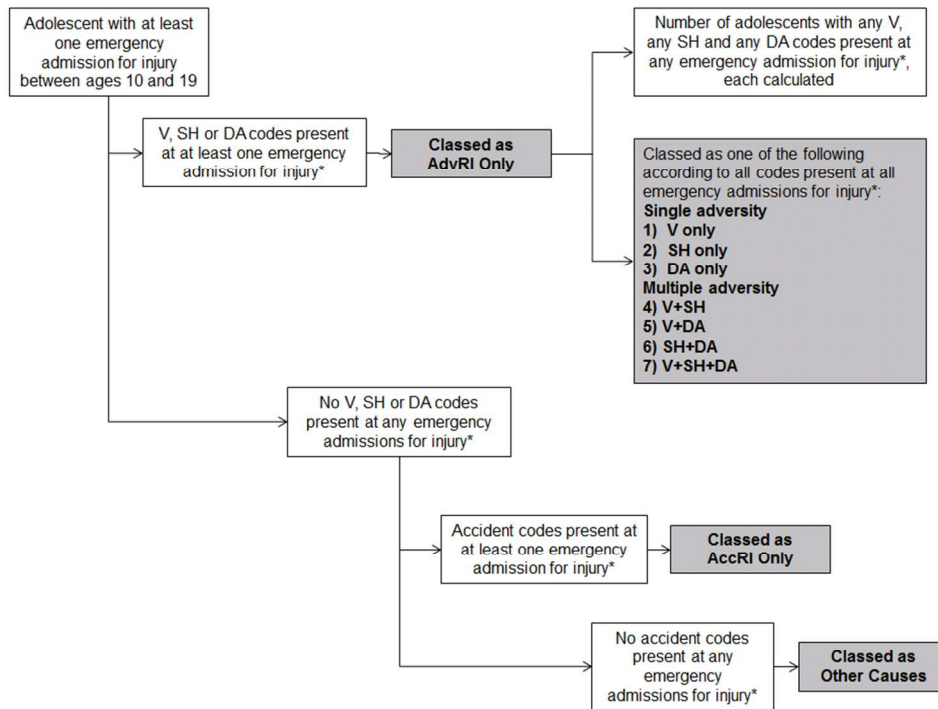

Supplementary Figure 1. Classification of groups of adolescents.

V = victimisation, SH = self-harm, DA = Drug or alcohol misuse, AdvRI = Adversity-related injury, AccRI Only = Accident-related injury only.

\*between ages 10 and 19.

262x201mm (96 x 96 DPI)

only

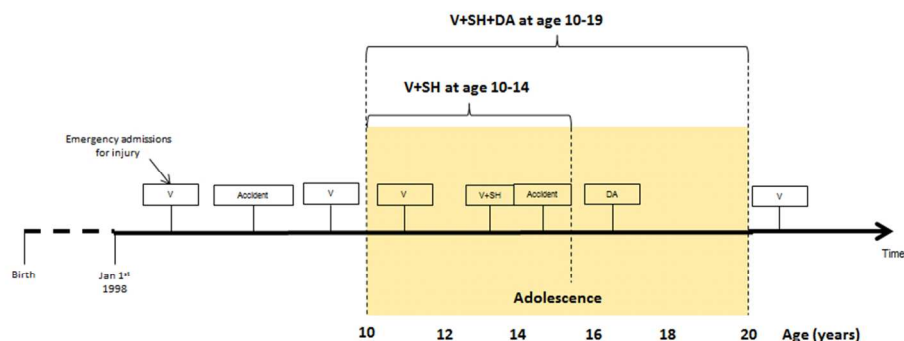

Supplementary Figure 2. Example of classification of groups of adolescents within age groups and across adolescence (ages 10-19).

V = victimisation, SH = self-harm, DA = drug or alcohol misuse.  
 254x102mm (96 x 96 DPI)

er review only

## STROBE Statement—checklist of items that should be included in reports of observational studies

|                              | Item No | Recommendation                                                                                                                                                                                                                                                                                                                                                                                                                                                                                                                                                                                                                                                                                        |
|------------------------------|---------|-------------------------------------------------------------------------------------------------------------------------------------------------------------------------------------------------------------------------------------------------------------------------------------------------------------------------------------------------------------------------------------------------------------------------------------------------------------------------------------------------------------------------------------------------------------------------------------------------------------------------------------------------------------------------------------------------------|
| <b>Title and abstract</b>    | 1       | (a) Indicate the study's design with a commonly used term in the title or the abstract<br>(b) Provide in the abstract an informative and balanced summary of what was done and what was found                                                                                                                                                                                                                                                                                                                                                                                                                                                                                                         |
| <b>Introduction</b>          |         |                                                                                                                                                                                                                                                                                                                                                                                                                                                                                                                                                                                                                                                                                                       |
| Background/rationale         | 2       | Explain the scientific background and rationale for the investigation being reported                                                                                                                                                                                                                                                                                                                                                                                                                                                                                                                                                                                                                  |
| Objectives                   | 3       | State specific objectives, including any prespecified hypotheses                                                                                                                                                                                                                                                                                                                                                                                                                                                                                                                                                                                                                                      |
| <b>Methods</b>               |         |                                                                                                                                                                                                                                                                                                                                                                                                                                                                                                                                                                                                                                                                                                       |
| Study design                 | 4       | Present key elements of study design early in the paper                                                                                                                                                                                                                                                                                                                                                                                                                                                                                                                                                                                                                                               |
| Setting                      | 5       | Describe the setting, locations, and relevant dates, including periods of recruitment, exposure, follow-up, and data collection                                                                                                                                                                                                                                                                                                                                                                                                                                                                                                                                                                       |
| Participants                 | 6       | (a) <i>Cohort study</i> —Give the eligibility criteria, and the sources and methods of selection of participants. Describe methods of follow-up<br><i>Case-control study</i> —Give the eligibility criteria, and the sources and methods of case ascertainment and control selection. Give the rationale for the choice of cases and controls<br><i>Cross-sectional study</i> —Give the eligibility criteria, and the sources and methods of selection of participants<br>(b) <i>Cohort study</i> —For matched studies, give matching criteria and number of exposed and unexposed. N/A<br><i>Case-control study</i> —For matched studies, give matching criteria and the number of controls per case |
| Variables                    | 7       | Clearly define all outcomes, exposures, predictors, potential confounders, and effect modifiers. Give diagnostic criteria, if applicable                                                                                                                                                                                                                                                                                                                                                                                                                                                                                                                                                              |
| Data sources/<br>measurement | 8*      | For each variable of interest, give sources of data and details of methods of assessment (measurement). Describe comparability of assessment methods if there is more than one group                                                                                                                                                                                                                                                                                                                                                                                                                                                                                                                  |
| Bias                         | 9       | Describe any efforts to address potential sources of bias. We only analysed those who could be observed between ages 10 and 19, so no bias due to different lengths of admission trajectories.                                                                                                                                                                                                                                                                                                                                                                                                                                                                                                        |
| Study size                   | 10      | Explain how the study size was arrived at. All available administrative data.                                                                                                                                                                                                                                                                                                                                                                                                                                                                                                                                                                                                                         |
| Quantitative variables       | 11      | Explain how quantitative variables were handled in the analyses. If applicable, describe which groupings were chosen and why                                                                                                                                                                                                                                                                                                                                                                                                                                                                                                                                                                          |
| Statistical methods          | 12      | (a) Describe all statistical methods, including those used to control for confounding<br>(b) Describe any methods used to examine subgroups and interactions<br>(c) Explain how missing data were addressed. N/A<br>(d) <i>Cohort study</i> —If applicable, explain how loss to follow-up was addressed. We only analysed those who could be observed between ages 10 and 19.<br><i>Case-control study</i> —If applicable, explain how matching of cases and controls was addressed<br><i>Cross-sectional study</i> —If applicable, describe analytical methods taking account of sampling strategy<br>(e) Describe any sensitivity analyses. N/A                                                     |

Continued on next page

**Results**

|                  |     |                                                                                                                                                                                                                                                                                                                                                                                                                                                                                                                     |
|------------------|-----|---------------------------------------------------------------------------------------------------------------------------------------------------------------------------------------------------------------------------------------------------------------------------------------------------------------------------------------------------------------------------------------------------------------------------------------------------------------------------------------------------------------------|
| Participants     | 13* | (a) Report numbers of individuals at each stage of study—eg numbers potentially eligible, examined for eligibility, confirmed eligible, included in the study, completing follow-up, and analysed<br>(b) Give reasons for non-participation at each stage. <i>N/A</i><br>(c) Consider use of a flow diagram. <i>We didn't use a flow diagram as eligibility could be described using one sentence.</i>                                                                                                              |
| Descriptive data | 14* | (a) Give characteristics of study participants (eg demographic, clinical, social) and information on exposures and potential confounders<br>(b) Indicate number of participants with missing data for each variable of interest<br>(c) <i>Cohort study</i> —Summarise follow-up time (eg, average and total amount). <i>N/A</i>                                                                                                                                                                                     |
| Outcome data     | 15* | <i>Cohort study</i> —Report numbers of outcome events or summary measures over time. <i>We state how many emergency admissions for adversity-related injury the AdvRI group had. We also provide a table indicating the number of emergency admissions for injury and admissions (of any type) during ages 10-19.</i><br><i>Case-control study</i> —Report numbers in each exposure category, or summary measures of exposure<br><i>Cross-sectional study</i> —Report numbers of outcome events or summary measures |
| Main results     | 16  | (a) Give unadjusted estimates and, if applicable, confounder-adjusted estimates and their precision (eg, 95% confidence interval). Make clear which confounders were adjusted for and why they were included. <i>We gave prevalence estimates stratified by age-group and sex.</i><br>(b) Report category boundaries when continuous variables were categorized<br>(c) If relevant, consider translating estimates of relative risk into absolute risk for a meaningful time period. <i>N/A</i>                     |
| Other analyses   | 17  | Report other analyses done—eg analyses of subgroups and interactions; and sensitivity analyses                                                                                                                                                                                                                                                                                                                                                                                                                      |

**Discussion**

|                  |    |                                                                                                                                                                            |
|------------------|----|----------------------------------------------------------------------------------------------------------------------------------------------------------------------------|
| Key results      | 18 | Summarise key results with reference to study objectives                                                                                                                   |
| Limitations      | 19 | Discuss limitations of the study, taking into account sources of potential bias or imprecision. Discuss both direction and magnitude of any potential bias                 |
| Interpretation   | 20 | Give a cautious overall interpretation of results considering objectives, limitations, multiplicity of analyses, results from similar studies, and other relevant evidence |
| Generalisability | 21 | Discuss the generalisability (external validity) of the study results                                                                                                      |

**Other information**

|         |    |                                                                                                                                                               |
|---------|----|---------------------------------------------------------------------------------------------------------------------------------------------------------------|
| Funding | 22 | Give the source of funding and the role of the funders for the present study and, if applicable, for the original study on which the present article is based |
|---------|----|---------------------------------------------------------------------------------------------------------------------------------------------------------------|

\*Give information separately for cases and controls in case-control studies and, if applicable, for exposed and unexposed groups in cohort and cross-sectional studies.

**Note:** An Explanation and Elaboration article discusses each checklist item and gives methodological background and published examples of transparent reporting. The STROBE checklist is best used in conjunction with this article (freely available on the Web sites of PLoS Medicine at <http://www.plosmedicine.org/>, Annals of Internal Medicine at <http://www.annals.org/>, and Epidemiology at <http://www.epidem.com/>). Information on the STROBE Initiative is available at [www.strobe-statement.org](http://www.strobe-statement.org).

# BMJ Open

## Violence, self-harm and drug or alcohol misuse in adolescents admitted to hospitals in England for injury: a retrospective cohort study

|                                 |                                                                                                                                                                                                                                                                                                                                                                                  |
|---------------------------------|----------------------------------------------------------------------------------------------------------------------------------------------------------------------------------------------------------------------------------------------------------------------------------------------------------------------------------------------------------------------------------|
| Journal:                        | <i>BMJ Open</i>                                                                                                                                                                                                                                                                                                                                                                  |
| Manuscript ID:                  | bmjopen-2014-006079.R1                                                                                                                                                                                                                                                                                                                                                           |
| Article Type:                   | Research                                                                                                                                                                                                                                                                                                                                                                         |
| Date Submitted by the Author:   | 29-Dec-2014                                                                                                                                                                                                                                                                                                                                                                      |
| Complete List of Authors:       | Herbert, Anne; UCL Institute of Child Health, Population, Policy and Practice Programme<br>Gilbert, Ruth; UCL Institute of Child Health, Population, Policy and Practice Programme<br>Gonzalez-Izquierdo, Arturo; UCL Institute of Child Health, Population, Policy and Practice Programme<br>Li, Leah; UCL Institute of Child Health, Population, Policy and Practice Programme |
| <b>Primary Subject Heading</b>: | Paediatrics                                                                                                                                                                                                                                                                                                                                                                      |
| Secondary Subject Heading:      | Mental health, Health services research                                                                                                                                                                                                                                                                                                                                          |
| Keywords:                       | MENTAL HEALTH, Non-accidental injury < PAEDIATRICS, Substance misuse < PSYCHIATRY, Suicide & self-harm < PSYCHIATRY                                                                                                                                                                                                                                                              |
|                                 |                                                                                                                                                                                                                                                                                                                                                                                  |

SCHOLARONE™  
Manuscripts

Only



1  
2  
3  
4  
5 **1 Violence, self-harm and drug or alcohol misuse in**  
6  
7 **2 adolescents admitted to hospitals in England for injury: a**  
8  
9 **3 retrospective cohort study**  
10  
11  
12  
13  
14

15 Annie Herbert, Centre for Paediatric Epidemiology & Biostatistics, University  
16 College London Institute of Child Health, 30 Guilford Street, London, WC1N  
17 1EH, Tel: +44207 905 2790, Fax: +44207 905 2793,  
18  
19 [annie.herbert.12@ucl.ac.uk](mailto:annie.herbert.12@ucl.ac.uk)  
20  
21  
22  
23

24  
25  
26 *Annie Herbert, M.Sc.<sup>1</sup>, Ruth Gilbert, M.D.<sup>1</sup>, Arturo González-*  
27 *Izquierdo, Ph.D.<sup>1</sup>, Leah Li, Ph.D.<sup>1</sup>*  
28  
29  
30

31  
32  
33 1. Centre for Paediatric Epidemiology & Biostatistics, University College  
34 London Institute of Child Health, 30 Guilford Street, London, WC1N 1EH, UK  
35

36  
37 Short title: Adversity in adolescents admitted to hospital for injury  
38

39 *Key words: Wounds and Injuries, Violence, Self-injurious Behaviour,*  
40 *Substance-related Disorders, Adolescent*  
41  
42  
43

44  
45  
46 Word count: 2,565  
47

48 No. figures: 2  
49

50 No tables: 2  
51

52 No references: 35  
53

54 No supplementary files for online only publication: 5  
55  
56  
57  
58  
59  
60

1  
2  
3 24  
4  
5  
6

7 **ABSTRACT**

8 **Objectives**

9  
10 Of adolescents in the general population in England, we aimed to determine  
11  
12 1) the proportion that has an emergency admission to hospital for injury  
13  
14 related to adversity (violence, self-harm or drug or alcohol misuse) and 2) the  
15  
16 risk of recurrent emergency admissions for injury in adolescents admitted with  
17  
18 adversity-related injury compared with those admitted with accident-related  
19  
20 injury only.  
21  
22

23 **Design**

24 We used longitudinally-linked administrative hospital data (Hospital Episode  
25  
26 Statistics) to identify 10-19 year olds with emergency admissions for injury  
27  
28 (including day cases lasting more than four hours), in England in 1998-2011.  
29  
30 We used Office for National Statistics mid-year estimates for population  
31  
32 denominators.  
33  
34

35 **Results**

36  
37 Approximately 4.3% (n=141 248) of adolescents in the general population  
38  
39 (n=3 254 046) had one or more emergency admissions for adversity-related  
40  
41 injury (girls 4.6%, boys 4.1%), accounting for 50.0% of all emergency  
42  
43 admissions for injury in girls and 29.1% in boys. Admissions for self-harm or  
44  
45 drug or alcohol misuse commonly occurred in the same girls and boys.  
46  
47 Recurrent emergency admissions for injury were more common in  
48  
49 adolescents with adversity-related injury (girls 17.3%; boys 16.5%) than in  
50  
51 those with accident-related injury only (girls 4.7%; boys 7.4%), particularly for  
52  
53  
54  
55  
56  
57  
58  
59  
60

1  
2  
3 48 adolescents with adversity-related injury related to multiple types of adversity  
4  
5 49 (girls 21.1%; boys 24.2%).  
6

7 50 **Conclusion**  
8

9  
10 51 Hospital-based interventions should be developed to reduce the risk of future  
11  
12 52 injury in adolescents admitted for adversity-related injury.  
13  
14  
15  
16  
17  
18  
19  
20  
21  
22  
23  
24  
25  
26  
27  
28  
29  
30  
31  
32  
33  
34  
35  
36  
37  
38  
39  
40  
41  
42  
43  
44  
45  
46  
47  
48  
49  
50  
51  
52  
53  
54  
55  
56  
57  
58  
59  
60

For peer review only

1  
2  
3 53 **What is already known on this subject**  
4

- 5 54 • Adolescents exposed to adversity (violence, self-harm or drug or  
6 alcohol misuse) often use health services, and repetitively.  
7 55  
8  
9 56 • Many adolescents in the general population are exposed to multiple  
10 types of adversity during their adolescence.  
11 57  
12  
13  
14  
15  
16

17 59 **What this study adds**

- 18  
19 60 • One in 20 adolescents in England has an emergency admission to  
20 hospital for adversity-related injury between 10 and 19 years old.  
21 61  
22  
23 62 • Many adolescents admitted with adversity-related injury (particularly  
24 girls) are admitted with multiple types of adversity, self-harm and drug  
25 or alcohol misuse being the most common combination.  
26 63  
27  
28 64  
29  
30 65 • Re-admission is more common in these adolescents than those  
31 admitted with accident-related injury only.  
32 66  
33  
34  
35  
36

37 68 **Strengths and limitations of this study**

- 38  
39 69 • Hospital Episodes Statistics (HES) captured data on all admissions to  
40 National Health Service hospitals in England at 10-19 years old in this  
41 study's cohort.  
42 70  
43  
44 71  
45  
46 72 • The longitudinal link between admissions for each individual in HES  
47 data allowed us to study the burden of multiple emergency admissions  
48 for injury over time.  
49 73  
50  
51 74  
52  
53 75 • However, violence, self-harm and drug or alcohol misuse are not  
54 always recognised at an admission, or consistently recorded, and  
55 76  
56  
57  
58  
59  
60

1  
2  
3  
4  
5  
6  
7  
8  
9  
10  
11  
12  
13  
14  
15  
16  
17  
18  
19  
20  
21  
22  
23  
24  
25  
26  
27  
28  
29  
30  
31  
32  
33  
34  
35  
36  
37  
38  
39  
40  
41  
42  
43  
44  
45  
46  
47  
48  
49  
50  
51  
52  
53  
54  
55  
56  
57  
58  
59  
60

77 therefore this study's estimates of prevalence of adversity are likely to  
78 be underestimates.

For peer review only

1  
2  
3 79 **INTRODUCTION**  
4

5 80 Many adolescents exposed to adversity such as violence, self-harm, or drug  
6  
7 81 or alcohol misuse use secondary health services,[1 2] often repetitively.[3 4]  
8  
9 82 For example, in a self-report survey of 15-16 year olds in England, 12.6% of  
10  
11 83 those who had self-harmed had presented to hospital.[2] It is also estimated  
12  
13 84 that approximately one-third of patients attending a hospital in England for  
14  
15 85 self-harm re-attend for self-harm in the following year.[4] Improved  
16  
17 86 management of adolescents exposed to adversity could reduce risk of  
18  
19 87 repetition as well as the burden on secondary care.[5-7]  
20  
21

22  
23 88 An admission to hospital provides the 'teachable moment'. [8] That is,  
24  
25 89 both adolescents and their families may be more likely to engage with an  
26  
27 90 intervention than if they had received it elsewhere. Hospital-based  
28  
29 91 interventions to reduce the risk of future harm could benefit these adolescents  
30  
31 92 by reducing episodes of injury, and may reduce recurrent emergency (i.e.,  
32  
33 93 acute or unplanned) admissions for injury.  
34  
35

36 94 To date, there is a lack of evidence on how different types of adversity-  
37  
38 95 related injury occur in the same adolescents over time. In addition, policy  
39  
40 96 makers and service providers need to know how many adolescents have an  
41  
42 97 emergency admission to hospital for adversity-related injury, their  
43  
44 98 characteristics and their specific rates of re-admission if they are to be  
45  
46 99 feasibly targeted for intervention.  
47  
48

49  
50 100 In this study we used administrative hospital data and Office for  
51  
52 101 National Statistics (ONS) mid-year population estimates to estimate the  
53  
54 102 number of adolescents in the general population who have ever had an  
55  
56 103 emergency admission to hospital for injury. We then estimated the  
57  
58  
59  
60

1  
2  
3 104 prevalence of emergency admissions for injury related to violence, self-harm  
4  
5 105 and drug or alcohol misuse (alone and co-occurring) in the general  
6  
7 106 population. Finally, we determined the risk of recurrent emergency  
8  
9  
10 107 admissions for injury in adolescents who had at least one admission between  
11  
12 108 10 and 19 years for adversity-related injury compared with adolescents only  
13  
14 109 ever admitted for accidental injury during the same period.  
15  
16  
17  
18  
19  
20  
21  
22  
23  
24  
25  
26  
27  
28  
29  
30  
31  
32  
33  
34  
35  
36  
37  
38  
39  
40  
41  
42  
43  
44  
45  
46  
47  
48  
49  
50  
51  
52  
53  
54  
55  
56  
57  
58  
59  
60

For peer review only

## 110 **METHODS**

### 111 **Study population**

112 Using administrative data from all admissions to National Health Service  
113 hospitals in England (Hospital Episode Statistics [HES]) in 1998-2011,[9] we  
114 derived a retrospective cohort of adolescents who turned 10 years old in  
115 1998-2002, who could be observed throughout adolescence until 19 years old  
116 (Supplementary Table 1).[10] Each individual also had to have at least one  
117 emergency admission for injury between 10 and 19 years old.

### 118 **Admission data**

119 The Health and Social Care Information Centre provided pseudonymised data  
120 on hospital admissions, use of which did not require Research Ethics  
121 Committee approval.[11] An admission is defined by the National Health  
122 Service as any hospital case lasting longer than four hours, and so includes  
123 long day cases as well as overnight stays. We analysed any hospital  
124 transfers or admissions within one day after discharge as the same  
125 admission, as previously described.[12] We used the variable for method of  
126 admission ('admimeth') to define an emergency admission. We used all  
127 International Classification of Diseases-10 (ICD-10) diagnosis codes recorded  
128 during an admission to categorise admissions as being for injury related to  
129 adversity or an accident (Supplementary Table 2).[13]

### 130 **Types of injury and age at emergency admission**

131 We defined an emergency admission for injury as being related to adversity,  
132 comprising violence (maltreatment/assault/undetermined causes of injury),



1  
2  
3 133 self-harm or drug or alcohol misuse, using mutually exclusive clusters of ICD-  
4  
5 134 10 codes (Supplementary Table 2). Violence was defined by previously-  
6  
7 135 validated codes, which would trigger consideration of violence by carers,  
8  
9  
10 136 peers or strangers.[12 14 15] We defined self-harm using codes that  
11  
12 137 mentioned either 'self-harm' or 'self-poisoning'. Drug or alcohol misuse was  
13  
14 138 defined by codes that mentioned 'alcohol', 'drugs', 'noxious substance' or  
15  
16 139 'solvent'. We defined an injury as being related to accidents only if no  
17  
18 140 adversity codes were present but there were codes from the ICD-10  
19  
20  
21 141 *Accidents* subchapter (V01-X59).[13]

22  
23 142 We grouped age at each admission to reflect age of onset of puberty  
24  
25 143 (10-14 years), age of sitting secondary school exams (15-17 years) and the  
26  
27 144 legal age for buying alcohol (18-19 years).[16-19]

28  
29  
30 145 **Classification of adolescents according to types of injury and age at**  
31  
32 146 **emergency admissions**

33  
34  
35 147 We classed adolescents into groups according to all of their emergency  
36  
37 148 admissions for injury between 10 and 19 years old. Adolescents were  
38  
39 149 classed as belonging to the 'adversity' group (any adversity-related injury  
40  
41 150 between 10 and 19 years old), 'accidents only' group (no adversity-related  
42  
43 151 injury but one or more accident-related injuries) or 'other causes' group (no  
44  
45 152 adversity-related or accident-related injuries) (Supplementary Figure 1).  
46  
47  
48 153 Among adolescents in the adversity group, we determined the proportion  
49  
50 154 exposed to violence-, self-harm- and drug or alcohol misuse-related injury at  
51  
52 155 age 10-19, respectively. We further classified the adversity group into seven  
53  
54 156 mutually exclusive sub-groups: violence only, self-harm only, drug or alcohol  
55  
56 157 misuse only, violence and self-harm, violence and drug or alcohol misuse,  
57  
58  
59  
60

1  
2  
3 158 self-harm and drug or alcohol misuse, and violence, self-harm and drug or  
4  
5 159 alcohol misuse.  
6

7 160 We also grouped adolescents as above, according to their emergency  
8  
9 161 admissions for injury at 10-14 years only, 15-17 years only and 18-19 years  
10  
11 162 only (Supplementary Figure 2).  
12

### 13 163 **Population denominators**

14 164 We used ONS mid-year population estimates to derive population  
15  
16 165 denominators.[20 21] These data are freely available online broken down by  
17  
18 166 sex and year of age.  
19  
20  
21  
22  
23

### 24 167 **Analyses**

25 168 We estimated the proportion of adolescents in the general population who had  
26  
27 169 an emergency admission for injury between 10 and 19 years old. We used  
28  
29 170 the number of adolescents in our derived retrospective cohort as the  
30  
31 171 numerator and ONS mid-year estimates for 10 year olds in 1998-2002 as the  
32  
33 172 population denominator. We then calculated these proportions by types of  
34  
35 173 injury at 10-19 years old (adversity-related [adversity group and seven  
36  
37 174 mutually exclusive subgroups] and accidents only [accidents only group]) and  
38  
39 175 by age group, as described above.  
40  
41  
42  
43

44 176 We calculated the proportion of adolescents in the adversity group (and  
45  
46 177 subgroups) and in the accidents only group who had an emergency admission  
47  
48 178 for injury twice and three or more times between 10 and 19 years old. We  
49  
50 179 also calculated the proportions of adolescents with two or three or more  
51  
52 180 admissions of any type (including non-emergency and non-injury).  
53  
54

55 181 We reported all results separately for girls and boys since differences  
56  
57 182 between girls and boys have been reported for prevalence of adversity in the  
58  
59  
60

1  
2  
3  
4  
5  
6  
7  
8  
9  
10  
11  
12  
13  
14  
15  
16  
17  
18  
19  
20  
21  
22  
23  
24  
25  
26  
27  
28  
29  
30  
31  
32  
33  
34  
35  
36  
37  
38  
39  
40  
41  
42  
43  
44  
45  
46  
47  
48  
49  
50  
51  
52  
53  
54  
55  
56  
57  
58  
59  
60

183 general population.[1 22-24] We calculated 95% confidence intervals for all  
184 proportions but did not present them here as they were all too narrow to  
185 convey any useful information (within one unit of the sample estimate).  
186 Analyses were carried out in StataSE 12.

For peer review only

1  
2  
3  
4  
5 187 **RESULTS**  
6

7 188 There were 1 033 702 adolescents in HES admissions data in 1998-2011, of  
8  
9 189 which 402 916 formed the study cohort (462 476 emergency admission for  
10  
11 190 injury when considering multiple presentations from the same adolescent, 802  
12  
13 191 682 admissions of any type [including non-emergency and non-injury, 662  
14  
15 192 727 of which were overnight stays]) (Table 1), representing 12.4% (402 916/3  
16  
17 193 254 046) of the adolescent population. Twice as many boys as girls had an  
18  
19 194 emergency admission for injury during adolescence (144 158/1 588 942 girls  
20  
21 195 in the population [8.7%]; 258 503/1 665 104 boys [16.3%]).  
22  
23  
24  
25  
26  
27  
28  
29  
30  
31  
32  
33  
34  
35  
36  
37  
38  
39  
40  
41  
42  
43  
44  
45  
46  
47  
48  
49  
50  
51  
52  
53  
54  
55  
56  
57  
58  
59  
60

196 **Table 1.** Characteristics of adolescents whose entire ten years of adolescence (ages 10-19) occurred in 1998-2011.

197

| Characteristics | Adolescent population* | Adolescents with emergency admission(s) for injury between 10 and 19 years old, n (row %) |                       |                       |                     |
|-----------------|------------------------|-------------------------------------------------------------------------------------------|-----------------------|-----------------------|---------------------|
|                 | Total                  | Total                                                                                     | Adversity             | Accidents only        | Other causes        |
| <b>All</b>      | <b>3,254,046</b>       | <b>402,916 (100.0)</b>                                                                    | <b>141,248 (35.1)</b> | <b>233,907 (58.1)</b> | <b>27,761 (6.9)</b> |
| <b>Age**</b>    |                        |                                                                                           |                       |                       |                     |
| <b>Girls</b>    | <b>1,588,942</b>       | <b>144,158 (100.0)</b>                                                                    | <b>72,805 (50.5)</b>  | <b>59,528 (41.3)</b>  | <b>11,888 (8.2)</b> |
| 10-14 years     | .                      | 65,208 (100.0)                                                                            | 23,178 (35.5)         | 37,388 (57.3)         | 4,642 (7.1)         |
| 15-17 years     | .                      | 48,286 (100.0)                                                                            | 31,573 (65.4)         | 12,922 (26.8)         | 3,791 (7.9)         |
| 18-19 years     | .                      | 30,664 (100.0)                                                                            | 18,054 (58.9)         | 9,155 (29.9)          | 3,455 (11.3)        |
| <b>Boys</b>     | <b>1,665,104</b>       | <b>258,503 (100.0)</b>                                                                    | <b>68,403 (26.5)</b>  | <b>174,267 (67.4)</b> | <b>15,833 (6.1)</b> |
| 10-14 years     | .                      | 121,821 (100.0)                                                                           | 17,667 (14.5)         | 97,478 (80.0)         | 6,676 (5.5)         |
| 15-17 years     | .                      | 79,223 (100.0)                                                                            | 25,014 (31.6)         | 49,345 (62.3)         | 4,864 (6.1)         |
| 18-19 years     | .                      | 57,459 (100.0)                                                                            | 25,722 (44.8)         | 27,444 (47.8)         | 4,293 (7.5)         |
| Missing (Sex)   | .                      | 255 (100.0)                                                                               | 40 (15.7)             | 175 (68.6)            | 40 (15.7)           |

198 \*Based on ONS mid-year England statistics for 10 year olds in 1998-2002.[20]

199 \*\*At first emergency admission for injury

## 200 **Types of injury and age at emergency admission**

201 One-third of the cohort (141 248, 4.3% of the population) had a record of an  
202 emergency admission for adversity-related injury between 10 and 19 years  
203 old (the adversity group; 157 004 emergency admissions for adversity-related  
204 injury in total) (Table 1), with similar rates between sexes (72 805, 4.6% girls  
205 in the population; 68 403, 4.1% boys).

206 The remaining two-thirds of the cohort (261 668, 8.1% of the  
207 adolescent population) had emergency admissions for injury which were  
208 never related to adversity (Table 1). Among these adolescents, 233 907  
209 (89.4%) had an accident-related injury (the accidents only group, 7.2% of the  
210 population) and 27 761 (10.6%) had no accident-related injury (other causes  
211 group, 0.9% of the population). A high proportion of the other causes group  
212 were affected by a chronic condition<sup>1</sup> between 10 and 19 years old (11 221/27  
213 761, 40.4%), compared with the adversity group (45 321/141 248, 32.1%) or  
214 accidents only group (49 434/233 907, 21.1%).

215 Proportions of adolescents in the general population and within  
216 individual age groups by adversity [and subgroups], accidents only, and other  
217 causes groups are provided in Supplementary Table 3.

## 218 **Types of adversity-related injury**

219 Among adolescents in the adversity group (girls 72 805, boys 68 403) (Figure  
220 1), the most common type of adversity was drug or alcohol misuse (girls  
221 91.5%, boys 60.0%). A higher proportion of boys than girls were exposed to

---

<sup>1</sup> Defined by ICD-10 codes (Supplementary Table 2)

1  
2  
3 222 violence (girls 8.5%, boys 47.6%), but a higher proportion of girls than boys  
4  
5 223 were exposed to self-harm (girls 74.6%; boys 32.9%).  
6

7 224 Girls in the adversity group were most likely to be exposed to multiple  
8  
9 225 types of adversity between 10 and 19 years old (69.2% + 2.0% + 1.2% + 0.2%  
10  
11 226 = 72.6%) (Figure 1), especially self-harm and drug or alcohol misuse (69.2%  
12  
13  
14 227 of the entire adversity group, i.e., most of the 72.6%). Fewer boys in the  
15  
16 228 adversity group were exposed to multiple types of adversity (38.4%), the most  
17  
18 229 common combination also being self-harm and drug or alcohol misuse  
19  
20  
21 230 (24.8%).  
22

23 231 For most of the adolescents who were exposed to multiple types of  
24  
25 232 adversity, the combination of types was recorded at the same admission. For  
26  
27 233 example, among the 130 adolescent girls who were exposed to violence and  
28  
29 234 self-harm between 10 and 19 years old (Table 2), 64.6% had both violence  
30  
31 235 and self-harm codes present simultaneously in at least one emergency  
32  
33 236 admission for injury (violence and drug or alcohol misuse 78.8%, self-harm  
34  
35 237 and drug or alcohol misuse 99.7%, violence, self-harm and drug or alcohol  
36  
37 238 misuse 33.9%; boys: violence and self-harm 40.1%, violence and drug or  
38  
39 239 alcohol misuse 84.1%, self-harm and drug or alcohol misuse 99.1%, violence,  
40  
41 240 self-harm and drug or alcohol misuse 20.0%) (data not shown).  
42  
43  
44  
45  
46  
47  
48  
49  
50  
51  
52  
53  
54  
55  
56  
57  
58  
59  
60

241 **Table 2.** Proportion of adolescents with 1, 2 or 3+ emergency admission(s) for injury or 1, 2 or 3+ admission(s) of any type, by  
 242 types of adversity between 10 and 19 years old\*

| Adolescent group*           | No. girls      | Girls (%)                         |             |            |                          |             |             | No. boys       | Boys (%)                          |             |            |                          |             |             |
|-----------------------------|----------------|-----------------------------------|-------------|------------|--------------------------|-------------|-------------|----------------|-----------------------------------|-------------|------------|--------------------------|-------------|-------------|
|                             |                | Emergency admission(s) for injury |             |            | Admission(s) of any type |             |             |                | Emergency admission(s) for injury |             |            | Admission(s) of any type |             |             |
|                             |                | 1                                 | 2           | 3+         | 1                        | 2           | 3+          |                | 1                                 | 2           | 3+         | 1                        | 2           | 3+          |
| <b>All</b>                  | <b>144,158</b> | <b>88.6</b>                       | <b>8.3</b>  | <b>3.1</b> | <b>57.6</b>              | <b>20.5</b> | <b>22.0</b> | <b>258,503</b> | <b>90.3</b>                       | <b>8.0</b>  | <b>1.8</b> | <b>68.5</b>              | <b>18.7</b> | <b>12.9</b> |
| <b>Adversity</b>            | <b>72,805</b>  | <b>82.7</b>                       | <b>12.0</b> | <b>5.3</b> | <b>53.8</b>              | <b>21.1</b> | <b>25.1</b> | <b>68,403</b>  | <b>83.5</b>                       | <b>12.4</b> | <b>4.1</b> | <b>64.8</b>              | <b>19.4</b> | <b>15.8</b> |
| Any violence                | 6,211          | 77.2                              | 13.9        | 8.9        | 49.1                     | 20.7        | 30.1        | 32,799         | 83.2                              | 12.8        | 4.0        | 65.6                     | 19.6        | 14.8        |
| Any self-harm               | 54,315         | 79.3                              | 13.9        | 6.8        | 51.2                     | 21.5        | 27.3        | 21,087         | 76.7                              | 15.8        | 7.5        | 57.0                     | 20.7        | 22.3        |
| Any drug or alcohol misuse  | 66,645         | 81.9                              | 12.5        | 5.6        | 53.6                     | 21.1        | 25.3        | 41,014         | 81.1                              | 13.6        | 5.3        | 62.9                     | 19.5        | 17.6        |
| <b>Single adversity</b>     | <b>19,924</b>  | <b>92.8</b>                       | <b>6.2</b>  | <b>1.0</b> | <b>61.2</b>              | <b>19.8</b> | <b>19.0</b> | <b>43,563</b>  | <b>71.3</b>                       | <b>8.3</b>  | <b>1.8</b> | <b>55.8</b>              | <b>15.2</b> | <b>10.3</b> |
| Violence only               | 3,734          | 92.4                              | 6.3         | 1.3        | 58.1                     | 20.4        | 21.6        | 24,912         | 87.1                              | 10.6        | 2.2        | 68.3                     | 19.2        | 12.6        |
| Self-harm only              | 2,296          | 90.3                              | 8.1         | 1.6        | 54.4                     | 20.7        | 24.9        | 2,260          | 87.3                              | 10.4        | 2.3        | 62.3                     | 19.8        | 17.9        |
| Drug or alcohol misuse only | 13,894         | 93.3                              | 5.9         | 0.8        | 63.2                     | 19.5        | 17.4        | 16,391         | 88.5                              | 9.5         | 2.1        | 69.9                     | 17.9        | 12.2        |
| <b>Multiple adversity</b>   | <b>52,881</b>  | <b>78.9</b>                       | <b>14.2</b> | <b>6.9</b> | <b>51.0</b>              | <b>21.6</b> | <b>27.4</b> | <b>24,840</b>  | <b>77.3</b>                       | <b>16.7</b> | <b>7.5</b> | <b>59.0</b>              | <b>21.0</b> | <b>21.5</b> |
| V + SH                      | 130            | 70.0                              | 20.8        | 9.2        | 42.3                     | 26.2        | 31.5        | 217            | 41.6                              | 15.4        | 6.1        | 32.8                     | 16.0        | 14.2        |



1  
2  
3  
4  
5  
6  
7  
8  
9  
10  
11  
12  
13  
14  
15  
16  
17  
18  
19  
20  
21  
22  
23  
24  
25  
26  
27  
28  
29  
30  
31  
32  
33  
34  
35  
36  
37  
38  
39  
40  
41  
42  
43  
44  
45  
46  
47  
48  
49

|                       |               |             |            |            |             |             |             |                |             |            |            |             |             |             |
|-----------------------|---------------|-------------|------------|------------|-------------|-------------|-------------|----------------|-------------|------------|------------|-------------|-------------|-------------|
| V + DA                | 862           | 81.9        | 15.1       | 3.0        | 52.2        | 22.9        | 24.9        | 6,013          | 84.6        | 17.5       | 5.4        | 68.4        | 21.8        | 17.3        |
| SH + DA               | 50,404        | 80.1        | 13.7       | 6.3        | 51.8        | 21.6        | 26.6        | 16,953         | 86.7        | 16.4       | 6.9        | 64.6        | 22.7        | 22.9        |
| V + SH + DA           | 1,485         | 36.8        | 31.6       | 31.5       | 25.5        | 19.9        | 54.5        | 1,657          | 22.0        | 16.4       | 14.1       | 17.9        | 11.7        | 22.8        |
| No adversity          | 71,353        | 94.7        | 4.5        | 0.8        | 61.4        | 19.9        | 18.7        | 190,100        | 92.4        | 6.3        | 0.9        | 69.5        | 18.3        | 11.8        |
| <b>Accidents only</b> | <b>59,465</b> | <b>95.3</b> | <b>4.1</b> | <b>0.6</b> | <b>66.5</b> | <b>18.7</b> | <b>14.7</b> | <b>174,267</b> | <b>92.3</b> | <b>6.5</b> | <b>0.9</b> | <b>71.1</b> | <b>18.0</b> | <b>10.5</b> |
| <b>Other causes</b>   | <b>11,888</b> | <b>91.5</b> | <b>6.3</b> | <b>2.1</b> | <b>35.5</b> | <b>25.8</b> | <b>38.8</b> | <b>15,833</b>  | <b>93.4</b> | <b>5.0</b> | <b>1.6</b> | <b>51.5</b> | <b>22.1</b> | <b>26.3</b> |

243 V = Violence, SH = Self-harm, DA = Drug or Alcohol Misuse  
 244 \* Each adolescent classified by all adversity/accidents seen at any emergency admission(s) for injury between 10 and 19 years old.

For peer review only

1  
2  
3  
4 245 **Emergency re-admissions for injury**  
5

6 246 Adolescent girls in the adversity group (50.5% of all girls in the cohort)  
7  
8 247 accounted for 50.0% of the total number of emergency admissions for injury  
9  
10 248 coming from girls (data not shown), compared with girls in the accidents only  
11  
12 249 group (41.3% of all girls) who accounted for 36.6%. Boys in the adversity  
13  
14 250 group (26.2% of all boys in the cohort) accounted for 29.1% compared with  
15  
16 251 65.0% contributed by boys in the accidents only group (67.7% of all boys).  
17  
18

19 252 More adolescents in the adversity group were re-admitted for injury  
20  
21 253 (i.e., had two or more emergency admissions for injury) between 10 and 19  
22  
23 254 years old (girls 17.3%, boys 16.5%) (Figure 2), than in the accidents only  
24  
25 255 group (girls 4.7%; boys 7.4%). Among adolescents admitted for injuries  
26  
27 256 related to multiple types of adversity (Table 2), the proportion re-admitted was  
28  
29 257 even higher (multiple types: girls 21.1%, boys 24.2%; single type: girls 7.2%,  
30  
31 258 boys 10.1%).  
32  
33

34  
35 259 Similarly, a higher proportion of adolescents in the adversity group had  
36  
37 260 two more admissions of any type (including non-emergency and non-injury)  
38  
39 261 between 10 and 19 years old (girls 46.2%; boys 35.2%) (Table 2) compared  
40  
41 262 with adolescents in the accidents only group (girls 33.4%; boys 28.5%). This  
42  
43 263 proportion was even higher for adolescents in the adversity group who were  
44  
45 264 admitted with multiple types of adversity (multiple types: girls 49.0%, boys  
46  
47 265 42.5%; single type: girls 38.8%, boys 25.5%).  
48  
49  
50  
51  
52  
53  
54  
55  
56  
57  
58  
59  
60

1  
2  
3 266 **DISCUSSION**  
4

5 267 More than one in 20 adolescents in England had at least one emergency  
6  
7 268 admission for adversity-related injury between 10 and 19 years old. These  
8  
9 269 adolescents accounted for a third of all adolescents with emergency  
10  
11 270 admissions for injury and for a disproportionate number of re-admissions for  
12  
13 271 injury, particularly adolescents admitted with multiple types of adversity-  
14  
15 272 related injury. Targeting adolescents admitted with adversity-related injury  
16  
17 273 could reduce their risk of future harm, the rate of re-admissions to hospital,  
18  
19 274 and health care costs .[25]  
20

21  
22  
23 275 Longitudinally-linked admissions allowed us to study the entire ten  
24  
25 276 years of adolescence in 402 916 individuals. We were able, to distinguish  
26  
27 277 between types of adversity that co-occurred during adolescence or at the  
28  
29 278 same admission, and to study re-admissions. One weakness of this study was  
30  
31 279 our reliance on diagnostic codes recorded in administrative data. Violence by  
32  
33 280 carers, which could be coded under maltreatment, and drug or alcohol misuse  
34  
35 281 have been shown to be under-recorded using ICD-10,[26 27] but false  
36  
37 282 positives are rare.[15] To address under-recording, we used what we  
38  
39 283 considered to be sensitive clusters of codes for adversity. Other factors  
40  
41 284 related to recording or coding practices,[12 14 15 27 28] for example, new  
42  
43 285 guidelines for defining maltreatment,[14] can also affect ascertainment.  
44  
45  
46  
47 286 Because of the relative insensitivity but good specificity of the coding clusters,  
48  
49 287 some adolescents who were classified in the accidents only group may in fact  
50  
51 288 belong to the adversity group, but did not have their adversity recognised or  
52  
53 289 recorded. Consequently, our prevalence estimates of admission for different  
54  
55  
56  
57  
58  
59  
60

1  
2  
3 290 types of adversity-related injury are likely to provide a lower bound for the true  
4  
5 291 prevalence.  
6

7 292 Our prevalence estimates of admission for injury related to individual  
8  
9 293 types of adversity from the general adolescent population are consistent with  
10  
11 294 previous reports for emergency admissions for assault-related injury in 2004-  
12  
13 295 2009 and for all admissions (emergency and non-emergency) for self-harm  
14  
15 296 and drug or alcohol misuse.[1 2 24 29] Previous studies have reported higher  
16  
17 297 rates of drug or alcohol misuse in boys than in girls in the general adolescent  
18  
19 298 population.[24] We found higher rates in girls. This difference could indicate  
20  
21 299 that girls exposed to drug or alcohol misuse are more likely to be injured, to  
22  
23 300 present to hospital, or to be admitted after a hospital presentation, than boys.  
24  
25  
26

27 301 Our estimated rates of re-admission of any type (including non-  
28  
29 302 emergency and non-injury) for violence (girls 50.8%, boys 34.4%) (Table 2)  
30  
31 303 and self-harm (girls 48.8%, boys 43.0%) were higher than previously reported  
32  
33 304 (11% for violence, 33% for self-harm).[3 4] These discrepancies are likely to  
34  
35 305 be because we considered the whole ten years of adolescence and re-  
36  
37 306 admission of any type, whereas previous studies looked at re-attendance up  
38  
39 307 to the following year and for the same type of adversity-related injury.[3 4]  
40  
41  
42

43 308 The results of this study should inform policy initiatives and national  
44  
45 309 guidelines. Firstly, a substantial proportion of adolescents are affected by  
46  
47 310 adversity and they account for a large proportion (29.1 to 50.0%) of all  
48  
49 311 emergency admissions to hospital for injury in this age group. Secondly, we  
50  
51 312 show the large burden of injury admission for all three types of adversity, yet  
52  
53 313 there are currently no national clinical guidelines for managing cases of  
54  
55 314 violence, other than responding to violence by caregivers.[30] Finally, these  
56  
57  
58  
59  
60

1  
2  
3 315 results show that adolescents often present with multiple types of adversity  
4  
5 316 (especially in girls), even though guidelines exist only for managing individual  
6  
7 317 problems.[31-33]  
8

9  
10 318 In addition, policy makers need to be aware of the widely varying  
11  
12 319 aetiological pathways to admission with adversity-related injury. Our  
13  
14 320 approach to defining this group of adolescents is not designed to reflect the  
15  
16 321 complexity or severity of these cases. For example, admission for multiple  
17  
18 322 types of adversity-related injury is a poor proxy indicator of severity. Effective  
19  
20 323 interventions will need to be tailored to the individual based on specialist  
21  
22 324 clinical assessment. However, all three types of adversity are likely to reflect  
23  
24 325 a combination of underlying psychosocial need and environmental and social  
25  
26 326 stressors.[34]  
27  
28

29 327 Hospital interventions may reduce the risk of future harm, including the  
30  
31 328 incidence of other types of harm not seen in hospital, e.g., further adversity-  
32  
33 329 related injury not leading to admission. Further research using linked data  
34  
35 330 from health care sectors such as accident and emergency, could shed light on  
36  
37 331 the overall burden of adversity-related injury on hospitals. Such analyses are  
38  
39 332 limited by the quality of accident and emergency data in England (available  
40  
41 333 since 2007) and the resulting problems with identifying reasons for  
42  
43 334 presentation and accurately linking individuals to long-term outcomes.[35]  
44  
45  
46  
47 335 However, longitudinally-linked datasets in other countries could provide  
48  
49 336 insights into long-term outcomes for this vulnerable group of adolescents.  
50  
51  
52  
53  
54  
55  
56  
57  
58  
59  
60

1  
2  
3  
4  
5 337 **Contributors**  
6

7 338 Annie Herbert – helped to conceive and design the study, analysed and  
8  
9 339 interpreted the data, drafted the article, revised it critically for important  
10  
11 340 intellectual content and approved the final version to be published.

12  
13  
14 341 Leah Li – helped to conceive and design the study, interpreted the data,  
15  
16 342 revised the article critically for important intellectual content and approved the  
17  
18 343 final version to be published.

19  
20 344 Arturo González-Izquierdo – helped to conceive and design the study,  
21  
22 345 acquired and interpreted the data, revised the article critically for important  
23  
24 346 intellectual content and approved the final version to be published.

25  
26  
27 347 Ruth Gilbert – helped to conceive and design the study, acquired and  
28  
29 348 interpreted the data, revised the article critically for important intellectual  
30  
31 349 content and approved the final version to be published.

32  
33  
34 350  
35 351 **Competing interests** None.

36  
37 352

38  
39 353 **Funding** AH was supported by the Policy Research Unit in the Health of  
40  
41 354 Children, Young People and Families, which is funded by the Department of  
42  
43 355 Health Policy Research Programme (grant reference number: 109/0001).

44  
45  
46 356 This report is an independent research commissioned by the Department of  
47  
48 357 Health. The views expressed in this publication are those of the authors and  
49  
50 358 not necessarily those of the Department of Health. AH is also supported by  
51  
52 359 the University College London IMPACT studentship. RG is supported by  
53  
54 360 awards establishing the Farr Institute of Health Informatics Research at  
55  
56  
57 361 University College London Partners from the Medical Research Council and a  
58  
59  
60

1  
2  
3 362 consortium of funders (MR/K006584/1). The study funders played no part in  
4  
5 363 the design, data analysis and interpretation of this study; the writing of the  
6  
7 364 manuscript or the decision to submit the paper for publication, and the  
8  
9  
10 365 authors' work was independent of their funders.

11  
12 366

13  
14 367 **Ethics** Both Hospital Episode Statistics (HES) admissions data and Office for  
15  
16 368 National Statistics (ONS) mid-year population estimates are derived from  
17  
18 369 routinely collected administrative data. HES data were pseudonymised  
19  
20  
21 370 before we received them and therefore we did not require Research Ethics  
22  
23 371 Committee approval.

24  
25 372

26  
27 373 **Data sharing** No additional data on HES are available. ONS mid-year  
28  
29 374 population estimates may be accessed freely online:  
30  
31  
32 375 [http://www.ons.gov.uk/ons/publications/all-](http://www.ons.gov.uk/ons/publications/all-releases.html?definition=tcm%3A77-22371)  
33  
34 376 [releases.html?definition=tcm%3A77-22371](http://www.ons.gov.uk/ons/publications/all-releases.html?definition=tcm%3A77-22371).

## 377 REFERENCES

- 378 1. Bellis MA, Hughes K, Wood S, et al. National five-year examination  
379 of inequalities and trends in emergency hospital admission for  
380 violence across England. *Injury prevention : journal of the*  
381 *International Society for Child and Adolescent Injury*  
382 *Prevention* 2011;**17**(5):319-25 doi:  
383 10.1136/ip.2010.030486[published Online First: Epub Date]].
- 384 2. Hawton K, Rodham K, Evans E, et al. Deliberate self harm in  
385 adolescents: self report survey in schools in England. *Bmj*  
386 2002;**325**(7374):1207-11
- 387 3. Meuleners LB, Lee AH, Hendrie D. Interpersonal violence  
388 hospitalisations for adolescents: A population-based study.  
389 *Journal of paediatrics and child health* 2010;**46**(11):686-90  
390 doi: 10.1111/j.1440-1754.2010.01818.x[published Online  
391 First: Epub Date]].
- 392 4. Lilley R, Owens D, Horrocks J, et al. Hospital care and repetition  
393 following self-harm: multicentre comparison of self-poisoning  
394 and self-injury. *The British Journal of Psychiatry*  
395 2008;**192**(6):440-45
- 396 5. Snider C, Lee J. Youth violence secondary prevention initiatives in  
397 emergency departments: a systematic review. *Cjem*  
398 2009;**11**(2):161-8
- 399 6. Ougrin D, Boege I, Stahl D, et al. Randomised controlled trial of  
400 therapeutic assessment versus usual assessment in adolescents  
401 with self-harm: 2-year follow-up. *Archives of disease in*  
402 *childhood* 2013;**98**(10):772-6 doi: 10.1136/archdischild-2012-  
403 303200[published Online First: Epub Date]].
- 404 7. Crawford MJ, Patton R, Touquet R, et al. Screening and referral for  
405 brief intervention of alcohol-misusing patients in an emergency  
406 department: a pragmatic randomised controlled trial. *The*  
407 *Lancet*;364(9442):1334-39 doi:  
408 [http://dx.doi.org/10.1016/S0140-6736\(04\)17190-](http://dx.doi.org/10.1016/S0140-6736(04)17190-0)  
409 [0](http://dx.doi.org/10.1016/S0140-6736(04)17190-0)[published Online First: Epub Date]].
- 410 8. Johnson SB, Bradshaw CP, Wright JL, et al. Characterizing the  
411 teachable moment: is an emergency department visit a  
412 teachable moment for intervention among assault-injured  
413 youth and their parents? *Pediatric emergency care*  
414 2007;**23**(8):553-59
- 415 9. Inpatient HES Data Dictionary. Leeds: Health and Social Care  
416 Information Centre, 2010.



- 1  
2  
3 417 10. World Health Organisation. Adolescent Health. Secondary  
4 418 Adolescent Health 2013.  
5  
6 419 [http://www.who.int/topics/adolescent\\_health/en/](http://www.who.int/topics/adolescent_health/en/).
- 7 420 11. National Health Service Act, 2006.
- 8  
9 421 12. Gonzalez-Izquierdo A, Woodman J, Copley L, et al. Variation in  
10 422 recording of child maltreatment in administrative records of  
11 423 hospital admissions for injury in England, 1997-2009. Archives  
12 424 of disease in childhood 2010;**95**(11):918-25 doi:  
13 425 10.1136/adc.2009.180216[published Online First: Epub Date]].
- 14 426 13. International Statistical Classification of Diseases and Related  
15 427 Health Problems 10th Revision. Secondary International  
16 428 Statistical Classification of Diseases and Related Health  
17 429 Problems 10th Revision.  
18  
19 429  
20 430 <http://apps.who.int/classifications/icd10/browse/2010/en>.
- 21 431 14. Saperia J, Lakhanpaul M, Kemp A, et al. When to suspect child  
22 432 maltreatment: summary of NICE guidance. Bmj  
23 433 2009;**339**:b2689 doi: 10.1136/bmj.b2689[published Online  
24 434 First: Epub Date]].
- 25 435 15. Gonzalez-Izquierdo A, Ward A, M OD, et al. Cross-country  
26 436 comparison of victimisation-related injury admission in  
27 437 children and adolescents in England and Western Australia.  
28 438 BMC Health Serv Res 2013;**13**(1):260 doi: 10.1186/1472-  
29 439 6963-13-260[published Online First: Epub Date]].
- 30 440 16. Patton GC, Viner R. Pubertal transitions in health. Lancet  
31 441 2007;**369**(9567):1130-9 doi: 10.1016/S0140-6736(07)60366-  
32 442 3[published Online First: Epub Date]].
- 33 443 17. Gill T. How old are GCSE candidates? Statistics Report Series,  
34 444 2010.
- 35 445 18. Directgov. AS and A levels. Secondary AS and A levels 2012.  
36 446 <http://webarchive.nationalarchives.gov.uk/20121015000000/>  
37 447 [http://www.direct.gov.uk/en/EducationAndLearning/Qualific](http://www.direct.gov.uk/en/EducationAndLearning/QualificationsExplained/DG_10039018)  
38 448 [ationsExplained/DG\\_10039018](http://www.direct.gov.uk/en/EducationAndLearning/QualificationsExplained/DG_10039018).
- 39 449 19. Buying Alcohol. Secondary Buying Alcohol 2013.  
40 450 [https://www.drinkaware.co.uk/check-the-facts/alcohol-and-](https://www.drinkaware.co.uk/check-the-facts/alcohol-and-the-law/buying-alcohol)  
41 451 [the-law/buying-alcohol](https://www.drinkaware.co.uk/check-the-facts/alcohol-and-the-law/buying-alcohol).
- 42 452 20. All releases of Population Estimates for UK, England and Wales,  
43 453 Scotland and Northern Ireland: Office for National Statistics,  
44 454 2013.
- 45 455 21. Office for National Statistics. Mid-year population estimates short  
46 456 methods guide: Office for National Statistics, 2010.
- 47 457 22. Radford L. Child abuse and neglect in the UK today. NSPCC  
48 458 Research: NSPCC, 2011.

- 1  
2  
3 459 23. *Truth hurts: report of the national inquiry into self-harm among*  
4 460 *young people*. London: Mental Health Foundation, 2006.  
5  
6 461 24. Hibell B, Guttormsson U, Ahlström S, et al. The 2011 ESPAD  
7 462 Report. Substance use among students in 2012;**36**  
8  
9 463 25. National Audit Office. Emergency admissions to hospital:  
10 464 managing the demand, 2013.  
11 465 26. Scott D, Tonmyr L, Fraser J, et al. The utility and challenges of  
12 466 using ICD codes in child maltreatment research: A review of  
13 467 existing literature. *Child abuse & neglect* 2009;**33**(11):791-808  
14 468 doi: S0145-2134(09)00202-6 [pii]  
15 469 10.1016/j.chiabu.2009.08.005[published Online First: Epub Date]].  
16  
17 470 27. McKenzie K, Harrison JE, McClure RJ. Identification of alcohol  
18 471 involvement in injury-related hospitalisations using routine  
19 472 data compared to medical record review. *Australian and New*  
20 473 *Zealand journal of public health* 2010;**34**(2):146-52 doi:  
21 474 10.1111/j.1753-6405.2010.00499.x[published Online First:  
22 475 Epub Date]].  
23  
24 476 28. Farrar S, Yi D, Sutton M, et al. Has payment by results affected the  
25 477 way that English hospitals provide care? Difference-in-  
26 478 differences analysis. *Bmj* 2009;**339** doi:  
27 479 10.1136/bmj.b3047[published Online First: Epub Date]].  
28  
29 480 29. Hawton K, Rodham K, Evans E, et al. Adolescents Who Self Harm:  
30 481 A Comparison of Those Who Go to Hospital and Those Who Do  
31 482 Not. *Child Adol Ment H-Uk* 2009;**14**(1):24-30 doi: DOI  
32 483 10.1111/j.1475-3588.2008.00485.x[published Online First:  
33 484 Epub Date]].  
34  
35 485 30. What to do if you're worried that a child is being abused. In: Skills  
36 486 DfE, ed.: DfES Publications, 2006.  
37  
38 487 31. *Self-harm. The short term physical and psychological management*  
39 488 *and secondary prevention of self-harm in primary and secondary*  
40 489 *care*. London: National Institute for Health and Clinical  
41 490 Excellence, 2011.  
42  
43 491 32. *Drug misuse: Psychosocial interventions*. London: National  
44 492 Institute for Health and Clinical Excellence, 2007.  
45  
46 493 33. Alcohol-use disorder : diagnosis, assessment and management of  
47 494 harmful drinking and alcohol dependence. London: National  
48 495 Institute for Health and Care Excellence, 2011.  
49  
50 496 34. Viner RM, Ozer EM, Denny S, et al. Adolescence and the social  
51 497 determinants of health. *Lancet* 2012;**379**(9826):1641-52 doi:  
52 498 10.1016/S0140-6736(12)60149-4[published Online First:  
53 499 Epub Date]].  
54  
55  
56  
57  
58  
59  
60

1  
2  
3  
4  
5  
6  
7  
8  
9  
10  
11  
12  
13  
14  
15  
16  
17  
18  
19  
20  
21  
22  
23  
24  
25  
26  
27  
28  
29  
30  
31  
32  
33  
34  
35  
36  
37  
38  
39  
40  
41  
42  
43  
44  
45  
46  
47  
48  
49  
50  
51  
52  
53  
54  
55  
56  
57  
58  
59  
60

500 35. Hospital Episode Statistics Accident & Emergency (England),  
501 2007-. Secondary Hospital Episode Statistics Accident &  
502 Emergency (England), 2007-.  
503 <http://adrn.ac.uk/catalogue/cataloguepage?sn=888040>.  
504

For peer review only

1  
2  
3  
4  
5  
6  
7  
8 1 **VictimisationViolence, self-harm and drug or alcohol misuse**  
9  
10 2 **in adolescents admitted to hospitals in England for injury: a**  
11  
12 3 **retrospective cohort study**  
13  
14  
15

16 5 Annie Herbert, Centre for Paediatric Epidemiology & Biostatistics, University  
17 6 College London Institute of Child Health, 30 Guilford Street, London, WC1N  
18 7 1EH, Tel: +44207 905 2790, Fax: +44207 905 2793,  
19 8 [annie.herbert.12@ucl.ac.uk](mailto:annie.herbert.12@ucl.ac.uk)  
20  
21  
22  
23  
24  
25

26 10 *Annie Herbert, M.Sc.<sup>1</sup>, Ruth Gilbert, M.D.<sup>1</sup>, Arturo González-*  
27 11 *Izquierdo, Ph.D.<sup>1</sup>, Leah Li, Ph.D.<sup>1</sup>*  
28  
29  
30  
31

32 13 1. Centre for Paediatric Epidemiology & Biostatistics, University College  
33 14 London Institute of Child Health, 30 Guilford Street, London, WC1N 1EH, UK  
34  
35

36 15 Short title: Adversity in adolescents admitted to hospital for injury  
37

38 16 *Key words: Wounds and Injuries, Violence, Self-injurious Behaviour,*  
39 17 *Substance-related Disorders, Adolescent*  
40  
41  
42  
43

44 19 | Word count: 2, ~~509~~565  
45

46 20 | No. figures: 2  
47

48 21 | No tables: 2  
49

50 22 | No references: ~~35~~2  
51

52 23 | No supplementary files for online only publication: ~~5~~5  
53  
54  
55  
56  
57  
58  
59  
60

24

## 25 ABSTRACT

### 26 Objectives

27 Of adolescents in the general population in England, we aimed to determine  
28 1) the proportion that has an emergency admission to hospital for injury  
29 related to adversity (~~victimisation~~violence, self-harm or drug or alcohol  
30 misuse) and 2) the risk of recurrent emergency admissions for injury in  
31 adolescents admitted with adversity-related injury compared with those  
32 admitted with accident-related injury only.

### 33 Design

34 We used longitudinally-linked hospital administrative hospital data (Hospital  
35 Episode Statistics) to identify 10-19 year olds with emergency admissions for  
36 injury (including day cases lasting more than four hours), in England in 1998-  
37 2011. We used Office for National Statistics mid-year estimates for  
38 population denominators.

### 39 Results

40 Approximately 4.3% (n=141 248) of adolescents in the general population  
41 (n=3 254 046) had one or more emergency admissions for adversity-related  
42 injury (~~140 512/3 254 046~~; girls 4.6%, boys 4.1%), accounting for 59.950.0%  
43 of all emergency admissions for injury in girls and 29.61% in boys.  
44 Admissions for self-harm or drug or alcohol misuse commonly occurred in the  
45 same girls and boys. Recurrent emergency admissions for injury were more  
46 common in adolescents with adversity-related injury (girls 17.3%; boys  
47 16.57%) than in those with accident-related injury only (girls 54.7%; boys

2

1  
2  
3  
4  
5  
6 48 | 7.4%), particularly for adolescents with adversity-related injury related to  
7  
8 49 | multiple types of adversity (girls 21.1%; boys 24.2%).  
9

10 **Conclusion**

11 Hospital-based interventions should be developed to reduce the risk of future  
12  
13  
14 52 | injury in adolescents admitted for adversity-related injury.  
15  
16  
17  
18  
19  
20  
21  
22  
23  
24  
25  
26  
27  
28  
29  
30  
31  
32  
33  
34  
35  
36  
37  
38  
39  
40  
41  
42  
43  
44  
45  
46  
47  
48  
49  
50  
51  
52  
53  
54  
55  
56  
57  
58  
59  
60

### 53 What is already known on this subject

- 54 • Adolescents exposed to adversity (~~victimisation~~violence, self-harm or  
55 drug or alcohol misuse) often use health services, and repetitively.
- 56 • Many adolescents in the general population are exposed to multiple  
57 types of adversity during their adolescence.

### 59 What this study adds

- 60 • One in 20 adolescents in England has~~ve~~ an emergency admission to  
61 hospital for adversity-related injury between 10 and 19 years old.
- 62 • Many adolescents admitted with adversity-related injury (particularly  
63 girls) are admitted with multiple types of adversity, self-harm and drug  
64 or alcohol misuse being the most common combination.
- 65 • Re~~\_~~admission is more common in these adolescents than those  
66 admitted with accident-related injury only.

### 68 Strengths and limitations of this study

- 69 • Hospital Episodes Statistics (HES) captured data on all admissions to  
70 National Health Service hospitals in England at 10-19 years old in this  
71 study's cohort.
- 72 • The longitudinal link between admissions for each individual in HES  
73 data allowed us to study the burden of multiple emergency admissions  
74 for injury over time.
- 75 • However, ~~victimisation~~violence, self-harm and drug or alcohol misuse  
76 are not always recognised at an admission, or consistently recorded,

1  
2  
3  
4  
5  
6 77 and therefore this study's estimates of prevalence of adversity are  
7  
8 78 likely to be underestimates.  
9  
10  
11  
12  
13  
14  
15  
16  
17  
18  
19  
20  
21  
22  
23  
24  
25  
26  
27  
28  
29  
30  
31  
32  
33  
34  
35  
36  
37  
38  
39  
40  
41  
42  
43  
44  
45  
46  
47  
48  
49  
50  
51  
52  
53  
54  
55  
56  
57  
58  
59  
60

For peer review only



## 79 INTRODUCTION

80 Many adolescents exposed to adversity such as ~~victimisation~~  
81 ~~violence(maltreatment or assault)~~, self-harm, or drug or alcohol misuse use  
82 secondary health services,[1 2] often repetitively.[3 4] For example, in a self-  
83 report survey of 15-16 year olds in England, 12.6% of those who had self-  
84 harmed had presented to hospital.[2] It is also estimated that approximately  
85 one-third of patients attending a hospital in England for self-harm re-attend for  
86 self-harm in the following year.[4] Improved management of adolescents  
87 exposed to adversity could reduce risk of repetition as well as the burden on  
88 secondary care.[5-7]

89 An admission to hospital provides the 'teachable moment' ~~.[8].[8] where~~  
90 ~~That is,~~ both adolescents and their families may be more likely to engage ~~with~~  
91 an intervention than if they had received it elsewhere. Hospital-based  
92 interventions to reduce the risk of future harm could benefit these adolescents  
93 by reducing episodes of injury, and may reduce recurrent emergency (i.e.,  
94 acute or unplanned) admissions for injury.

95 To date, there is a lack of evidence on how different types of  
96 adversity-related injury occur in the same adolescents, over time. In addition,  
97 policy makers and service providers need ~~to~~ know how many adolescents  
98 have an emergency admission to hospital for adversity-related injury, their  
99 characteristics and their specific rates of re-admission if they are to be  
100 feasibly targeted for intervention.

101 In this study we used administrative hospital data and Office for  
102 National Statistics (ONS) mid-year population estimates to estimate the  
103 number of adolescents in the general population who ~~have~~ ever had ~~ve~~ an

1  
2  
3  
4  
5  
6 104 emergency admission to hospital for injury. We then estimated the  
7  
8 105 prevalence of emergency admissions for injury related to  
9  
10 106 ~~victimisation~~violence, self-harm and drug or alcohol misuse (alone and co-  
11  
12 107 occurring) in the general population. Finally, we determined the risk of  
13  
14 108 recurrent emergency admissions for injury in adolescents who had at least  
15  
16 109 one admission between 10 and 19 years for adversity-related injury compared  
17  
18 110 with adolescents only ever admitted for accidental injury during the same  
19  
20 111 period.  
21  
22  
23  
24  
25  
26  
27  
28  
29  
30  
31  
32  
33  
34  
35  
36  
37  
38  
39  
40  
41  
42  
43  
44  
45  
46  
47  
48  
49  
50  
51  
52  
53  
54  
55  
56  
57  
58  
59  
60

1  
2  
3  
4  
5  
6  
7  
8 112 **METHODS**

9  
10 113 **Study population**

11 114 Using administrative data from all admissions to National Health Service  
12 115 hospitals in England (Hospital Episode Statistics [HES]) in 1998-2011,[9] we  
13 116 derived a retrospective cohort of adolescents who turned 10 years old in  
14 117 1998-2002, who could be observed throughout adolescence until 19 years old  
15 118 (Supplementary Table 1).[10] Each individual also had to have at least one  
16 119 emergency admission for injury between 10 and 19 years old.

17  
18  
19  
20  
21  
22  
23  
24  
25 120 **Admission data**

26 121 The Health and Social Care Information Centre provided pseudonymised data  
27 122 on hospital admissions, use of which did not require Research Ethics  
28 123 Committee approval.[11] An admission is defined by the National Health  
29 124 Service as any hospital case lasting longer than four hours, and so includes  
30 125 long day cases as well as overnight stays. We analysed any hospital  
31 126 transfers or admissions within one day after discharge as the same  
32 127 admission, as previously described.[12] We used the variable for method of  
33 128 admission ('admimeth') to define an emergency admission. We used all  
34 129 International Classification of Diseases-10 (ICD-10) diagnosis codes recorded  
35 130 during an admission to categorise admissions as being for injury related to  
36 131 adversity ~~or;~~ an accident ~~\_ or other causes~~ (Supplementary Table 2).[13]

37  
38  
39  
40  
41  
42  
43  
44  
45  
46  
47  
48  
49 132 **Types of injury and age at emergency admission**

50 133 We defined an emergency admission for injury as being ~~for~~-related to  
51 134 adversity, comprising victimisation-violence

1  
2  
3  
4  
5  
6 135 | (maltreatment/assault/~~undetermined causes of injury~~), self-harm or drug or  
7  
8 136 | alcohol misuse, using mutually exclusive clusters of ICD-10 codes  
9  
10 137 | (Supplementary Table 2). ~~Violence~~ ~~timisation~~ was defined by previously-  
11  
12 138 | validated codes, which would trigger consideration of ~~maltreatment-violence~~  
13  
14 139 | by carers ~~or of assault, peers or strangers~~. [12 14 15] We defined self-harm  
15  
16 140 | using codes that mentioned either 'self-harm' or 'self-poisoning', ~~and excluded~~  
17  
18 141 | ~~'undetermined intent'~~. Drug or alcohol misuse was defined by codes that  
19  
20 142 | mentioned 'alcohol', 'drugs', 'noxious substance' or 'solvent'. ~~We considered~~  
21  
22 143 | ~~alcohol use (Z72.1) to be misuse only in adolescents younger than 18.~~ We  
23  
24 144 | defined an injury as being related to accidents only if no adversity codes were  
25  
26 145 | present but there were codes from the ICD-10 *Accidents* subchapter (V01-  
27  
28 146 | X59). [13]

29  
30 147 | We grouped age at each admission ~~as 10-14 years, 15-17 years and~~  
31  
32 148 | ~~18-19 years~~, to reflect age of onset of puberty (10-14 years), age of sitting  
33  
34 149 | secondary school exams (~~15-18~~ 15-17 years) and the legal age for buying  
35  
36 150 | alcohol (18-19 years). [16-19]

### 151 **Classification of adolescents according to types of injury and age at** 152 **emergency admissions**

153 We classed adolescents into groups according to all of their emergency  
154 admissions for injury between 10 and 19 years old. Adolescents were  
155 classed as belonging to the '~~AdvR~~adversity' group (any adversity-related  
156 injury between 10 and 19 years old), '~~AccR~~accidents Only' group (no  
157 adversity-related injury but one or more accident-related injuries) or '~~o~~Other  
158 Causes' group (no adversity-related or accident-related injuries)  
159 (Supplementary Figure 1). Among adolescents in the ~~AdvR~~adversity group,

1  
2  
3  
4  
5  
6 160 we determined the proportion exposed to ~~victimisation-violence-~~, self-harm-  
7  
8 161 and drug or alcohol misuse-related injury at age 10-19, respectively. We  
9  
10 162 further classified the ~~Adversity~~ group into seven mutually exclusive sub-  
11  
12 163 groups: ~~Victimisation-violence Only~~, ~~Selfself-harm Only~~, ~~Drug-drug~~ or  
13  
14 164 ~~Alcohol-alcohol Misuse misuse Only (DA Only)~~, ~~Victimisation-violence~~ and  
15  
16 165 ~~Selfself-harm (V+SH)~~, ~~Victimisation-violence~~ and ~~Drug-drug~~ or ~~Alcohol-alcohol~~  
17  
18 166 ~~Mmisuse (V+DA)~~, ~~Selfself-harm~~ and ~~Drug-drug~~ or ~~Alcohol-alcohol Misuse~~  
19  
20 167 ~~misuse, (SH+ DA)~~ and ~~Victimisation violence~~, ~~Selfself-harm~~ and ~~Drug-drug~~ or  
21  
22 168 ~~Alcohol-alcohol Mmisuse (V+SH+DA)~~.

23  
24 169 We also grouped adolescents as above, according to their emergency  
25  
26 170 admissions for injury at 10-14 years only, 15-17 years only and 18-19 years  
27  
28 171 only (Supplementary Figure 2).

### 172 ~~Defining an adolescent as having a chronic condition~~

173 ~~We used a previously validated cluster of ICD-10 codes to identify~~  
174 ~~adolescents who had been affected by a chronic condition in any admission~~  
175 ~~between 10 and 19 years old (Supplementary Table 2).~~

### 176 **Population denominators**

177 We used ONS mid-year population estimates to derive population  
178 denominators.[20 21] These data are freely available online broken down by  
179 sex and year of age.

### 180 **Analyses**

181 We estimated the proportion of adolescents in the general population who had  
182 an emergency admission for injury between 10 and 19 years old. ~~We, by~~  
183 ~~using~~ the number of adolescents in our derived retrospective cohort as the

1  
2  
3  
4  
5  
6 184 numerator and ONS mid-year estimates for 10 year olds in 1998-2002 as the  
7  
8 185 population denominator. We then calculated these proportions by types of  
9  
10 186 injury at 10-19 years old (adversity-related [~~AdvR~~adversity group and seven  
11  
12 187 mutually exclusive subgroups] and accidents only [~~AccR~~accidents Only-only  
13  
14 188 group]) and by age group, as described above.

15  
16 189 We calculated the proportion of adolescents in the ~~AdvR~~adversity  
17  
18 190 group (and subgroups) and in the ~~AccR~~accidents Only-only group, who had  
19  
20 191 an emergency admission for injury twice and three or more times between 10  
21  
22 192 and 19 years old. We also calculated the proportions of adolescents with two  
23  
24 193 or three or more admissions of any type (including non-emergency and non-  
25  
26 194 injury).

27  
28 195 We reported all results separately for girls and boys, since differences  
29  
30 196 between girls and boys have been reported for prevalence of adversity in the  
31  
32 197 general population.[1 22-24] We calculated 95% confidence intervals for all  
33  
34 198 proportions but did not present them [here](#) as they were all too narrow to  
35  
36 199 convey any useful information (within one unit of the sample estimate).  
37  
38 200 Analyses were carried out in StataSE 12.

201 **RESULTS**

202 There were 1 033 702 adolescents in HES admissions data in 1998-2011, of  
203 which 402 916 formed the study cohort (462 476 emergency admission for  
204 injury when considering multiple presentations from the same adolescent, 802  
205 682 admissions of any type [including non-emergency and non-injury 1,662  
206 727 of which were overnight stays] (Table 1), representing 12.4% (402 916/3  
207 254 046) of the adolescent population. Twice as many boys as girls had an  
208 emergency admission for injury during adolescence (144 158/1 588 942 girls  
209 in the population [8.7%]; 258 503/1 665 104 boys [16.3%]).

**Table 1.** Characteristics of adolescents ~~between 10 and 19 years old~~ whose entire ten years of adolescence (ages 10-19) occurred in 1998-2011.

| Characteristics | Adolescent Population<br>opulation* | Adolescents with emergency admission(s) for injury between 10 and 19 years old, n (row %)    |                                     |                                     |                                 |
|-----------------|-------------------------------------|----------------------------------------------------------------------------------------------|-------------------------------------|-------------------------------------|---------------------------------|
|                 |                                     | Total                                                                                        | AdvRI<br>Adversity                  | AccRI<br>Accidents Only             | Other Causes<br>causes          |
| All             | 3,254,046                           | 402,916 (100.0)                                                                              | 141,248<br>140,512 (35.1)<br>(34.9) | 233,907<br>234,665 (58.1)<br>(58.2) | 27,761<br>27,739 (6.9)<br>(6.9) |
| Age**           |                                     |                                                                                              |                                     |                                     |                                 |
| Girls           | 1,588,942                           | 144,158 (100.0)                                                                              | 72,805<br>72,768 (50.5)<br>(50.5)   | 59,528<br>59,528 (41.3)<br>(41.3)   | 11,888<br>11,862 (8.2)<br>(8.2) |
| 10-14 years     | .                                   | 65,208 (100.0)                                                                               | 23,178<br>23,289 (35.5)<br>(35.7)   | 37,388<br>37,303 (57.3)<br>(57.2)   | 4,642<br>4,616 (7.1)<br>(7.1)   |
| 15-17 years     | .                                   | 48,286 (100.0)                                                                               | 31,573<br>31,620 (65.4)<br>(65.5)   | 12,922<br>12,882 (26.8)<br>(26.7)   | 3,791<br>3,784 (7.9)<br>(7.8)   |
| 18-19 years     | .                                   | 30,664 (100.0)                                                                               | 18,054<br>17,859 (58.9)<br>(58.2)   | 9,155<br>9,343 (29.9)<br>(30.5)     | 3,455<br>3,462 (11.3)<br>(11.3) |
| Boys            | 1,665,104                           | 258,503 (100.0)                                                                              | 68,403<br>67,704 (26.5)<br>(26.2)   | 174,267<br>174,962 (67.4)<br>(67.7) | 15,833<br>15,837 (6.1)<br>(6.1) |
| 10-14 years     | .                                   | 121,821 (100.0)                                                                              | 17,667<br>17,660 (14.5)<br>(14.5)   | 97,478<br>97,511 (80.0)<br>(80.0)   | 6,676<br>6,650 (5.5)<br>(5.5)   |
| 15-17 years     | .                                   | 79,223 (100.0)                                                                               | 25,014<br>25,004 (31.6)<br>(31.6)   | 49,345<br>49,366 (62.3)<br>(62.3)   | 4,864<br>4,853 (6.1)<br>(6.1)   |
| 18-19 years     | .                                   | 57,459 (100.0)                                                                               | 25,722<br>25,040 (44.8)<br>(43.6)   | 27,444<br>28,085 (47.8)<br>(48.9)   | 4,293                           |
| Missing (Sex)   | .                                   | 255 (100.0)                                                                                  | 404<br>40 (15.7)<br>(15.7)          | 175<br>175 (68.6)<br>(68.6)         | 404<br>40 (15.7)<br>(15.7)      |
|                 |                                     | Adolescents with emergency admission(s) for injury between 10 and 19 years old, n (column %) |                                     |                                     |                                 |
|                 |                                     | Total                                                                                        | AdvRI                               | AccRI Only                          | Other Causes                    |



1  
2  
3  
4  
5  
6  
7  
8  
9  
10  
11  
12  
13  
14  
15  
16  
17  
18  
19  
20  
21  
22  
23  
24  
25  
26  
27  
28  
29  
30  
31  
32  
33  
34  
35  
36  
37  
38  
39  
40  
41  
42  
43  
44  
45  
46  
47  
48  
49

|                          |                  |                        |                        |                        |                       |
|--------------------------|------------------|------------------------|------------------------|------------------------|-----------------------|
| <b>All</b>               | <b>3,254,046</b> | <b>402,916 (100.0)</b> | <b>140,512 (100.0)</b> | <b>234,665 (100.0)</b> | <b>27,739 (100.0)</b> |
| <b>Chronic Condition</b> | <b>-</b>         | <b>117,190 (29.0)</b>  | <b>47,001 (33.4)</b>   | <b>52,509 (22.4)</b>   | <b>16,706 (60.0)</b>  |

213 ~~AdvRI = Adversity-related Injury, AccRI Only = Accident-related Injury Only.~~  
 214 ~~\*Adolescents whose entire ten years of adolescence (ages 10-19) occurred in 1998-2011.~~  
 215 \*Based on ONS mid-year England statistics for 10 year olds in 1998-2002.[20]  
 216 \*\*At first emergency admission for injury

Peer review only

## 217 **Types of injury and age at emergency admission**

218 One-third of the cohort (~~140-152~~141 248, 4.3% of the population) had a record  
 219 of an emergency admission for adversity-related injury between 10 and 19  
 220 years old (the ~~AdvR~~adversity group; ~~1537 633-004~~ emergency admissions for  
 221 adversity-related injury in total) (Table 1), with similar rates between sexes (72  
 222 ~~768805~~, 4.36% girls in the population; ~~67-704~~68 403, 4.1% boys).

223 The remaining two-thirds of the cohort (~~2621 404,668~~, 8.1% of the  
 224 adolescent population) had emergency admissions for injury which were  
 225 never related to adversity (Table 1). Among these adolescents, ~~2343 665-907~~  
 226 (89.4%) had an accident-related injury (the ~~AccR~~accidents Only-only group,  
 227 7.2% of the population) and ~~27 739-761~~ (10.6%) had no accident-related  
 228 injury (~~Other-other Causes-causes~~ group, 0.9% of the population). A higher  
 229 proportion of the ~~Other-other Causes-causes~~ group were affected by a chronic  
 230 condition<sup>1</sup> between 10 and 19 years old (~~46-706~~11 221/27 739761, 6040.4%),  
 231 compared with the ~~AdvR~~adversity group (~~47-001/140-54245 321/141 248~~,  
 232 32.13%) or ~~AccR~~accidents Only-only group (~~52-50949 434/234-665233 907~~,  
 233 2221.1%).

234 Proportions of adolescents in the general population and within  
 235 individual age groups by These groupings (AdvRadversity [and subgroups],  
 236 AccRaccidents only, Other and other Causescauses groups) are provided in  
 237 Supplementary Table 3, ~~as proportions of adolescents in the general~~  
 238 ~~population and within individual age groups.~~

<sup>1</sup> Defined by ICD-10 codes (Supplementary Table 2)

1  
2  
3  
4  
5  
6 239 **Types of adversity-related injury**  
7

8 240 Among adolescents in the [Adversity](#) group (girls 72 ~~768805~~, boys  
9 ~~67,70468 403~~) (Figure 1), the most common type of adversity was drug or  
10 241 ~~67,70468 403~~ (Figure 1), the most common type of adversity was drug or  
11 242 alcohol misuse (girls 91.54%, boys ~~5860.0~~%). A higher proportion of boys  
12 243 than girls were exposed to [victimisation-violence](#) (girls 178.5%, boys  
13 244 ~~51.747.6~~%), but a higher proportion of girls than boys were exposed to self-  
14 245 harm (girls 74.6%; boys ~~31.032.9~~%).  
15  
16  
17  
18  
19  
20  
21  
22  
23  
24  
25  
26  
27  
28  
29  
30  
31  
32  
33  
34  
35  
36  
37  
38  
39  
40  
41  
42  
43  
44  
45  
46  
47  
48  
49  
50  
51  
52  
53  
54  
55  
56  
57  
58  
59  
60

Girls in the **AdvRI** **adversity** group were most likely to be exposed to multiple types of adversity between 10 and 19 years old (69.2% + 2.0% + 1.2% + 0.2% = 72.6%) (Figure 1), especially **SH+DA** **self-harm and drug or alcohol misuse** (61.769.2% of the entire adversity group, i.e., most of the 732.6%). Fewer boys in the **AdvRI** **adversity** group were exposed to multiple types of adversity (36.238.4%), the most common combination also being **SH+DA** **self-harm and drug or alcohol misuse** (22.724.8%).

For most of the adolescents who **were** exposed to multiple types of adversity, the combination of types was recorded at the same admission. For example, among the 352-130 adolescent girls who were exposed to **victimisation-violence** and self-harm between 10 and 19 years old (**Figure 4** **Table 2**), 85.364.6% had both **violence** **victimisation** and self-harm codes present simultaneously **in** at least one emergency admission for injury (**violence and drug or alcohol misuse** **V+DA** 86.178.8%, **SH+DA** **self-harm and drug or alcohol misuse** 99.7%, **V+SH+DA** **violence, self-harm and drug or alcohol misuse** 83.233.9%; boys: **V+SH** **violence and self-harm** 63.240.1%, **violence and drug or alcohol misuse** **V+DA** 84.51%, **self-harm and drug or alcohol misuse** **SH+DA** 99.10%, **violence, self-harm and drug or alcohol misuse** **V+SH+DA** 59.120.0%) (data not shown).

#### **Emergency readmissions for injury**

Adolescent girls in the **AdvRI** group (50.5% of all girls in the cohort) accounted for 59.9% of the total number of emergency admissions for injury coming from girls (data not shown), compared with girls in the **AccRI Only** group (41.3% of all girls) who accounted for 15.1%. Boys in the **AdvRI** group (26.2% of all

1  
2  
3  
4  
5  
6 270 | boys in the cohort) accounted for 29.6% compared with 61.7% contributed by  
7  
8 271 | boys in the AccRI Only group (67.7% of all boys).  
9  
10 272 | More adolescents in the AdvRI group were readmitted for injury (i.e.,  
11  
12 273 | had two or more emergency admissions for injury) between 10 and 19 years  
13  
14 274 | old (both girls and boys 17%) (Figure 2), than in the AccRI Only group (girls  
15  
16 275 | 5%; boys 7%). Among adolescents admitted for AdvRIs related to multiple  
17  
18 276 | types of adversity (Table 2), the proportion readmitted was even higher  
19  
20 277 | (multiple types: girls 21%, boys 24%; single type: girls 7%, boys 12%).  
21  
22  
23  
24  
25  
26  
27  
28  
29  
30  
31  
32  
33  
34  
35  
36  
37  
38  
39  
40  
41  
42  
43  
44  
45  
46  
47  
48  
49  
50  
51  
52  
53  
54  
55  
56  
57  
58  
59  
60

278 **Table 2.** Proportion of adolescents ~~s girls and boys~~ with 1, 2 or 3+ emergency admission(s) for injury or 1, 2 or 3+ admission(s) of  
 279 any type, by types of adversity between 10 and 19 years old\*

| Adolescent group*           | No. girls    | Girls (%)                         |          |         |                          |          |          | Boys (%)                          |          |          |                          |          |          |          |
|-----------------------------|--------------|-----------------------------------|----------|---------|--------------------------|----------|----------|-----------------------------------|----------|----------|--------------------------|----------|----------|----------|
|                             |              | Emergency admission(s) for injury |          |         | Admission(s) of any type |          |          | Emergency admission(s) for injury |          |          | Admission(s) of any type |          |          |          |
|                             |              | 1                                 | 2        | 3+      | 1                        | 2        | 3+       | No. boys                          | 1        | 2        | 3+                       | 1        | 2        | 3+       |
| All                         | 144,158      | 88.688.6                          | 8.38.3   | 3.13.4  | 57.657.6                 | 20.520.5 | 22.022.0 | 258,503                           | 90.390.3 | 8.08.0   | 1.84.8                   | 68.568.5 | 18.748.7 | 12.942.9 |
| Any Adversity               | 72,80572,768 | 82.782.6                          | 12.042.0 | 5.35.3  | 53.853.8                 | 21.121.0 | 25.125.2 | 68,40367,704                      | 83.583.4 | 12.442.5 | 4.14.4                   | 64.864.7 | 19.449.4 | 15.845.9 |
| Any Violence                | 6,21142,740  | 77.273.4                          | 13.945.7 | 8.944.2 | 49.146.7                 | 20.724.0 | 30.132.3 | 32,79935,003                      | 83.282.6 | 12.842.9 | 4.04.5                   | 65.664.9 | 19.649.4 | 14.845.7 |
| Any Self-harm               | 54,31554,315 | 79.379.3                          | 13.943.9 | 6.86.8  | 51.251.2                 | 21.521.5 | 27.327.3 | 21,08721,087                      | 76.776.7 | 15.845.8 | 7.57.5                   | 57.057.0 | 20.720.7 | 22.322.3 |
| Any Drug or alcohol Misuse  | 66,64566,255 | 81.984.8                          | 12.542.5 | 5.65.7  | 53.653.5                 | 21.124.4 | 25.325.4 | 41,01439,264                      | 81.180.9 | 13.643.7 | 5.35.4                   | 62.962.6 | 19.549.6 | 17.647.8 |
| Single adversity            | 19,92419,194 | 92.892.9                          | 6.26.4   | 1.04.0  | 61.261.2                 | 19.849.6 | 19.049.2 | 43,56343,244                      | 71.387.6 | 8.340.2  | 1.82.2                   | 55.868.5 | 15.248.8 | 10.342.8 |
| Violence Only               | 3,7344,047   | 92.494.8                          | 6.36.7   | 1.34.5  | 58.157.6                 | 20.420.2 | 21.622.2 | 24,91225,908                      | 87.187.0 | 10.640.7 | 2.22.3                   | 68.368.4 | 19.249.2 | 12.642.7 |
| Self-harm Only              | 2,2962,444   | 90.390.8                          | 8.17.7   | 1.64.5  | 54.454.4                 | 20.720.8 | 24.924.8 | 2,2602,488                        | 87.387.6 | 10.440.0 | 2.32.4                   | 62.362.8 | 19.849.6 | 12.642.7 |
| Drug or Alcohol misuse Only | 13,89413,033 | 93.393.5                          | 5.95.7   | 0.80.8  | 63.263.4                 | 19.549.3 | 17.447.3 | 16,39145,448                      | 88.588.5 | 9.59.4   | 2.12.4                   | 69.969.9 | 17.947.9 | 12.242.2 |

Formatted Table

1  
2  
3  
4  
5  
6  
7  
8  
9  
10  
11  
12  
13  
14  
15  
16  
17  
18  
19  
20  
21  
22  
23  
24  
25  
26  
27  
28  
29  
30  
31  
32  
33  
34  
35  
36  
37  
38  
39  
40  
41  
42  
43  
44  
45  
46  
47  
48  
49

|  | Adolescent group*  | No. girls | Girls (%)                         |        |        |                          |        |        | Boys (%)                          |        |        |                          |        |        |        |
|--|--------------------|-----------|-----------------------------------|--------|--------|--------------------------|--------|--------|-----------------------------------|--------|--------|--------------------------|--------|--------|--------|
|  |                    |           | Emergency admission(s) for injury |        |        | Admission(s) of any type |        |        | Emergency admission(s) for injury |        |        | Admission(s) of any type |        |        |        |
|  |                    |           | 1                                 | 2      | 3+     | 1                        | 2      | 3+     | No. boys                          | 1      | 2      | 3+                       | 1      | 2      | 3+     |
|  | Multiple adversity | 52,881    | 78.979                            | 14.214 | 6.969  | 51.051                   | 21.621 | 27.427 | 24,840                            | 77.376 | 16.716 | 7.575                    | 59.058 | 21.020 | 21.521 |
|  | V + SH             | 130,352   | 70.080                            | 20.814 | 9.248  | 42.349                   | 26.223 | 31.527 | 217,344                           | 41.671 | 15.421 | 6.164                    | 32.853 | 16.024 | 14.221 |
|  | V + DA             | 862,137   | 81.984                            | 15.113 | 3.023  | 52.254                   | 22.922 | 24.923 | 6,013                             | 84.678 | 17.516 | 5.453                    | 68.463 | 21.820 | 17.316 |
|  | SH + DA            | 50,404    | 80.184                            | 13.713 | 6.354  | 51.852                   | 21.624 | 26.625 | 16,953                            | 86.779 | 16.414 | 6.955                    | 64.659 | 22.724 | 22.919 |
|  | V + SH + DA        | 1,485     | 36.859                            | 31.621 | 31.519 | 25.538                   | 19.921 | 54.540 | 1,657                             | 22.054 | 16.424 | 14.121                   | 17.943 | 11.719 | 22.837 |
|  | No adversity       | 71,353    | 94.794                            | 4.545  | 0.808  | 61.461                   | 19.919 | 18.718 | 190,100                           | 92.492 | 6.364  | 0.909                    | 69.569 | 18.318 | 11.811 |
|  | Accidents only     | 59,465    | 95.395                            | 4.114  | 0.606  | 66.566                   | 18.718 | 14.714 | 174,267                           | 92.392 | 6.565  | 0.909                    | 71.171 | 18.018 | 10.510 |
|  | Other causes       | 11,888    | 91.591                            | 6.363  | 2.121  | 35.535                   | 25.825 | 38.838 | 15,833                            | 93.493 | 5.050  | 1.616                    | 51.551 | 22.122 | 26.326 |

280 V = Victimization/Violence, SH = Self-harm, DA = Drug or Alcohol Misuse, AdvRI = Adversity-related Injury, AccRI Only = Accident-related Injury Only.  
 281 \* Each adolescent classified by all adversities/accidents seen at any emergency admission(s) for injury between 10 and 19 years old.

1  
2  
3  
4  
5  
6  
7 282 Emergency re-admissions for injury

8  
9 283 Adolescent girls in the adversity group (50.5% of all girls in the cohort)

10 284 accounted for 50.0% of the total number of emergency admissions for injury

11 285 coming from girls (data not shown), compared with girls in the accidents only

12 286 group (41.3% of all girls) who accounted for 36.6%. Boys in the adversity

13 287 group (26.2% of all boys in the cohort) accounted for 29.1% compared with

14 288 65.0% contributed by boys in the accidents only group (67.7% of all boys).

15  
16  
17  
18  
19  
20  
21 289 More adolescents in the adversity group were re-admitted for injury

22 290 (i.e., had two or more emergency admissions for injury) between 10 and 19

23 291 years old (girls 17.3%, boys 16.5%) (Figure 2), than in the accidents only

24 292 group (girls 4.7%; boys 7.4%). Among adolescents admitted for injuries

25 293 related to multiple types of adversity (Table 2), the proportion re-admitted was

26 294 even higher (multiple types: girls 21.1%, boys 24.2%; single type: girls 7.2%,

27 295 boys 10.1%).

28  
29  
30  
31  
32  
33  
34 296 Similarly, a higher proportion of adolescents in the Adversity

35 297 group had two more admissions of any type (including non-emergency and

36 298 non-injury) between 10 and 19 years old (girls 43.2%; boys 35.2%); (Table

37 299 2) compared with adolescents in the Accidents Only group (girls

38 300 33.4%; boys 28.5%). This proportion was even higher for adolescents in the

39 301 Adversity group who were admitted with multiple types of adversity

40 302 (multiple types: girls 48.8%, boys 42.5%; single type: girls 38.8%, boys

41 303 34.6%).

42  
43  
44  
45  
46  
47  
48  
49  
50  
51  
52  
53  
54  
55  
56  
57  
58  
59  
60



1  
2  
3  
4  
5  
6 304 **DISCUSSION**

7  
8 305 More than one in 20 adolescents in England had at least one emergency  
9  
10 306 admission for adversity-related injury between 10 and 19 years old. These  
11  
12 307 adolescents accounted for a third of all adolescents with emergency  
13  
14 308 admissions for injury and for a disproportionate number of re-admissions for  
15  
16 309 injury, particularly adolescents admitted with multiple types of adversity-  
17  
18 310 related injury. Targeting adolescents admitted with adversity-related injury  
19  
20 311 could reduce their risk of future harm, ~~and~~ the rate of re-admissions to  
21  
22 312 hospital, ~~and, which could reduce health care some of the most expensive~~  
23  
24 313 ~~types of healthcare and the UK government is keen to reduce costs~~. [25]

25  
26 314 Longitudinally-linked admissions allowed us to study the entire ten  
27  
28 315 years of adolescence in 402 916 ~~adolescents~~ individuals. ~~We were able~~, to  
29  
30 316 distinguish between types of adversity that co-occurred during adolescence or  
31  
32 317 at the same admission, and to study re-admissions.

33  
34 318 One weakness of this study was our reliance on diagnostic codes  
35  
36 319 recorded in administrative data. ~~Violence by carers, which could be coded~~  
37  
38 320 ~~under maltreatment, Maltreatment~~ and drug or alcohol misuse have been  
39  
40 321 shown to be under-recorded using ICD-10, [26 27] but false positives are  
41  
42 322 rare. [15] To address under-recording, we used what we considered to be  
43  
44 323 sensitive clusters of codes for adversity. Other factors related to recording or  
45  
46 324 coding practices, [12 14 15 27 28] for example, new guidelines for defining  
47  
48 325 maltreatment, [14] can also affect ascertainment. Because of the relative  
49  
50 326 insensitivity but good specificity of the coding clusters, some adolescents who  
51  
52 327 were classified in the ~~AccR~~ accidents only group may in fact belong to the  
53  
54 328 ~~AdvR~~ adversity group, but did not have their adversity recognised or recorded.

1  
2  
3  
4  
5  
6 329 Consequently, our prevalence estimates of admission for different types of  
7  
8 330 adversity-related injury are likely to provide a lower bound for the true  
9  
10 331 prevalence.

11 332 Our prevalence estimates of admission for injury related to individual  
12  
13 333 types of adversity from the general adolescent population are consistent with  
14  
15 334 previous reports for emergency admissions for assault-related injury in 2004-  
16  
17 335 2009 and for all admissions (emergency and non-emergency) for self-harm  
18  
19 336 and drug or alcohol misuse.[1 2 24 29] Previous studies have reported higher  
20  
21 337 rates of drug or alcohol misuse in boys than in girls in the general adolescent  
22  
23 338 population.[24] We found higher rates in girls. This difference could indicate  
24  
25 339 that girls exposed to drug or alcohol misuse are more likely to be injured, to  
26  
27 340 present to hospital, or to be admitted after a hospital presentation, than boys  
28  
29 341 be admitted after presenting to hospital, as a result.

30  
31 342 Our estimated rates of re-admission of any type (including non-  
32  
33 343 emergency and non-injury) for victimisation violence (girls 53.350.8%, boys  
34  
35 344 35.134.4%) (Table 2) and self-harm (girls 48.8%, boys 43.0%) were higher  
36  
37 345 than previously reported (11% for victimisation violence, 33% for self-harm).[3  
38  
39 346 4] These discrepancies are likely to be because we considered the whole ten  
40  
41 347 years of adolescence and re-admission of any type, whereas previous studies  
42  
43 348 looked at re-attendance up to the following year and for the same type of  
44  
45 349 adversity-related injury.[3 4]

46  
47 350 The results of this study should inform policy initiatives and national  
48  
49 351 guidelines. Firstly, a substantial proportion of adolescents are affected by  
50  
51 352 adversity and they account for a large proportion (29.6-1 to -509.09%) of all  
52  
53 353 emergency admissions to hospital for injury in this age group. Secondly, we

1  
2  
3  
4  
5  
6 354 show the large burden of injury admission for all three types of adversity, yet  
7  
8 355 there are currently no national clinical guidelines for managing cases of  
9  
10 356 assault violence, other than responding to violence by caregivers.<sup>[30]</sup> Finally,  
11  
12 357 these results show that adolescents often present with multiple types of  
13  
14 358 adversity (especially in girls), even though guidelines exist only for managing  
15  
16 359 individual problems.<sup>[31-33]</sup>

17  
18 360 In addition, policy makers need to be aware of the widely varying  
19  
20 361 aetiological pathways to admission with adversity-related injury. Our  
21  
22 362 approach to defining this group of adolescents is not designed to reflect the  
23  
24 363 complexity or severity of these cases. For example, admission for multiple  
25  
26 364 types of adversity-related injury is a poor proxy indicator of severity. Effective  
27  
28 365 interventions will need to be tailored to the individual, based on specialist  
29  
30 366 clinical assessment. However, all three types of adversity are likely to reflect  
31  
32 367 a combination of underlying psychosocial need and environmental and social  
33  
34 368 stressors.<sup>[34]</sup> This intervention

35  
36 369 Hospital interventions may reduce the risk of future harm, including the  
37  
38 370 incidence of other types of harm not seen in hospital, e.g., further adversity-  
39  
40 371 related injury not leading to admission, that are likely to be more frequent in  
41  
42 372 these adolescents, and which the hospital administrative data we used does  
43  
44 373 not capture. Further research using work in admissions-linked data linked  
45  
46 374 from to other administrative datasets, e-health care sectors such asg,  
47  
48 375 accident and emergency data, could tell us if the risk of these other types of  
49  
50 376 harm is also increased in adolescents admitted with adversity-related  
51  
52 377 injury could shed light on the overall burden of adversity-related injury on  
53  
54 378 hospitals. this, as well as, tell us whether the risk of future harm is increased in

1  
2  
3  
4  
5  
6 379 adolescents who attend hospital with adversity related injury but are not  
7 admitted. Such analyses are limited by the quality of Such work in England  
8 380 would be challenging, as accident and emergency data in England (available  
9 381 since 2007) and the resulting problems with identifying reasons for  
10 382 presentation and accurately linking individuals to long-term outcomes are  
11 383 much sparser than national admissions data and have only been collected  
12 384 since 2007<sup>[35]</sup> However, Existing longitudinally-linked datasets in other  
13 385 countries could provide insights into long-term outcomes for this vulnerable  
14 386 group of adolescents.  
15  
16  
17  
18  
19  
20  
21  
22  
23  
24  
25  
26  
27  
28  
29  
30  
31  
32  
33  
34  
35  
36  
37  
38  
39  
40  
41  
42  
43  
44  
45  
46  
47  
48  
49  
50  
51  
52  
53  
54  
55  
56  
57  
58  
59  
60

1  
2  
3  
4  
5  
6  
7  
8 388 **Contributors**

9  
10 389 | Annie Herbert — helped \_to conceive and design the study, analysed and  
11  
12 390 | interpreted the data, drafted the article, revised it critically for important  
13  
14 391 | intellectual content and approved the final version to be published.

15  
16 392 | Leah Li — helped \_to conceive and design the study, interpreted the data,  
17  
18 393 | revised the article critically for important intellectual content and approved the  
19  
20 394 | final version to be published.

21  
22 395 | Arturo González-Izquierdo — helped \_to conceive and design the study,  
23  
24 396 | acquired and interpreted the data, revised the article critically for important  
25  
26 397 | intellectual content and approved the final version to be published.

27  
28 398 | Ruth Gilbert – helped to conceive and design the study, acquired and  
29  
30 399 | interpreted the data, revised the article critically for important intellectual  
31  
32 400 | content and approved the final version to be published.

33  
34 401  
35 402 **Competing interests** None.

36 403

37  
38 404 **Funding** AH was supported by the Policy Research Unit in the Health of  
39  
40 405 Children, Young People and Families, which is funded by the Department of  
41  
42 406 Health Policy Research Programme (grant reference number: 109/0001).

43  
44 407 This report is an independent research commissioned by the Department of  
45  
46 408 Health. The views expressed in this publication are those of the authors and  
47  
48 409 not necessarily those of the Department of Health. AH is also supported by

49  
50 410 | the University College London IMPACT studentship. RG is supported by

51  
52 411 | awards establishing the Farr Institute of Health Informatics Research at

53  
54 412 | University College London Partners from the Medical Research Council and a

1  
2  
3  
4  
5  
6 413 | [consortium of funders \(MR/K006584/1\)](#). The study funders played no part in  
7  
8 414 the design, data analysis and interpretation of this study; the writing of the  
9  
10 415 manuscript or the decision to submit the paper for publication, and the  
11  
12 416 authors' work was independent of their funders.  
13

14 417

15  
16 418 **Ethics** Both Hospital Episode Statistics (HES) admissions data and Office for  
17  
18 419 National Statistics (ONS) mid-year population estimates are derived from  
19  
20 420 routinely collected administrative data. HES data were pseudonymised  
21  
22 421 before we received them and therefore we did not require Research Ethics  
23  
24 422 Committee approval.  
25

26 423

27  
28 424 **Data sharing** No additional data on HES are available. ONS mid-year  
29  
30 425 population estimates may be accessed freely online:

31  
32 426 [http://www.ons.gov.uk/ons/publications/all-](http://www.ons.gov.uk/ons/publications/all-releases.html?definition=tcm%3A77-22371)

33  
34 427 [releases.html?definition=tcm%3A77-22371](http://www.ons.gov.uk/ons/publications/all-releases.html?definition=tcm%3A77-22371).  
35  
36  
37  
38  
39  
40  
41  
42  
43  
44  
45  
46  
47  
48  
49  
50  
51  
52  
53  
54  
55

## 428 REFERENCES

- 429 1. Bellis MA, Hughes K, Wood S, et al. National five-year examination  
430 of inequalities and trends in emergency hospital admission for  
431 violence across England. *Injury prevention : journal of the*  
432 *International Society for Child and Adolescent Injury*  
433 *Prevention* 2011;**17**(5):319-25 doi:  
434 10.1136/ip.2010.030486[published Online First: Epub Date]].
- 435 2. Hawton K, Rodham K, Evans E, et al. Deliberate self harm in  
436 adolescents: self report survey in schools in England. *Bmj*  
437 2002;**325**(7374):1207-11
- 438 3. Meuleners LB, Lee AH, Hendrie D. Interpersonal violence  
439 hospitalisations for adolescents: A population-based study.  
440 *Journal of paediatrics and child health* 2010;**46**(11):686-90  
441 doi: 10.1111/j.1440-1754.2010.01818.x[published Online  
442 First: Epub Date]].
- 443 4. Lilley R, Owens D, Horrocks J, et al. Hospital care and repetition  
444 following self-harm: multicentre comparison of self-poisoning  
445 and self-injury. *The British Journal of Psychiatry*  
446 2008;**192**(6):440-45
- 447 5. Snider C, Lee J. Youth violence secondary prevention initiatives in  
448 emergency departments: a systematic review. *Cjem*  
449 2009;**11**(2):161-8
- 450 6. Ougrin D, Boege I, Stahl D, et al. Randomised controlled trial of  
451 therapeutic assessment versus usual assessment in adolescents  
452 with self-harm: 2-year follow-up. *Archives of disease in*  
453 *childhood* 2013;**98**(10):772-6 doi: 10.1136/archdischild-2012-  
454 303200[published Online First: Epub Date]].
- 455 7. Crawford MJ, Patton R, Touquet R, et al. Screening and referral for  
456 brief intervention of alcohol-misusing patients in an emergency  
457 department: a pragmatic randomised controlled trial. *The*  
458 *Lancet*; **364**(9442):1334-39 doi:  
459 [http://dx.doi.org/10.1016/S0140-6736\(04\)17190-](http://dx.doi.org/10.1016/S0140-6736(04)17190-0)  
460 [0](http://dx.doi.org/10.1016/S0140-6736(04)17190-0)[published Online First: Epub Date]].
- 461 8. Johnson SB, Bradshaw CP, Wright JL, et al. Characterizing the  
462 teachable moment: is an emergency department visit a  
463 teachable moment for intervention among assault-injured  
464 youth and their parents? *Pediatric emergency care*  
465 2007;**23**(8):553-59
- 466 9. Inpatient HES Data Dictionary. Leeds: Health and Social Care  
467 Information Centre, 2010.

Formatted: Font: Cambria, 14 pt, French (France), Do not check spelling or grammar

- 1  
2  
3  
4  
5  
6 468 10. World Health Organisation. Adolescent Health. Secondary  
7 469 Adolescent Health 2013.  
8  
9 470 [http://www.who.int/topics/adolescent\\_health/en/](http://www.who.int/topics/adolescent_health/en/).
- 10 471 11. National Health Service Act, 2006.
- 11 472 12. Gonzalez-Izquierdo A, Woodman J, Copley L, et al. Variation in  
12 473 recording of child maltreatment in administrative records of  
13 474 hospital admissions for injury in England, 1997-2009. Archives  
14 475 of disease in childhood 2010;**95**(11):918-25 doi:  
15 476 10.1136/adc.2009.180216[published Online First: Epub Date]].
- 16 477 13. International Statistical Classification of Diseases and Related  
17 478 Health Problems 10th Revision. Secondary International  
18 479 Statistical Classification of Diseases and Related Health  
19 480 Problems 10th Revision.  
20 481 <http://apps.who.int/classifications/icd10/browse/2010/en>.
- 21 482 14. Saperia J, Lakhanpaul M, Kemp A, et al. When to suspect child  
22 483 maltreatment: summary of NICE guidance. Bmj  
23 484 2009;**339**:b2689 doi: 10.1136/bmj.b2689[published Online  
24 485 First: Epub Date]].
- 25 486 15. Gonzalez-Izquierdo A, Ward A, M OD, et al. Cross-country  
26 487 comparison of victimisation-related injury admission in  
27 488 children and adolescents in England and Western Australia.  
28 489 BMC Health Serv Res 2013;**13**(1):260 doi: 10.1186/1472-  
29 490 6963-13-260[published Online First: Epub Date]].
- 30 491 16. Patton GC, Viner R. Pubertal transitions in health. Lancet  
31 492 2007;**369**(9567):1130-9 doi: 10.1016/S0140-6736(07)60366-  
32 493 3[published Online First: Epub Date]].
- 33 494 17. Gill T. How old are GCSE candidates? Statistics Report Series,  
34 495 2010.
- 35 496 18. Directgov. AS and A levels. Secondary AS and A levels 2012.  
36 497 <http://webarchive.nationalarchives.gov.uk/20121015000000/>  
37 498 [http://www.direct.gov.uk/en/EducationAndLearning/Qualific](http://www.direct.gov.uk/en/EducationAndLearning/QualificationsExplained/DG_10039018)  
38 499 [ationsExplained/DG\\_10039018](http://www.direct.gov.uk/en/EducationAndLearning/QualificationsExplained/DG_10039018).
- 39 500 19. Buying Alcohol. Secondary Buying Alcohol 2013.  
40 501 [https://www.drinkaware.co.uk/check-the-facts/alcohol-and-](https://www.drinkaware.co.uk/check-the-facts/alcohol-and-the-law/buying-alcohol)  
41 502 [the-law/buying-alcohol](https://www.drinkaware.co.uk/check-the-facts/alcohol-and-the-law/buying-alcohol).
- 42 503 20. All releases of Population Estimates for UK, England and Wales,  
43 504 Scotland and Northern Ireland: Office for National Statistics,  
44 505 2013.
- 45 506 21. Office for National Statistics. Mid-year population estimates short  
46 507 methods guide: Office for National Statistics, 2010.
- 47 508 22. Radford L. Child abuse and neglect in the UK today. NSPCC  
48 509 Research: NSPCC, 2011.



- 1  
2  
3  
4  
5  
6 510 23. *Truth hurts: report of the national inquiry into self-harm among*  
7 511 *young people*. London: Mental Health Foundation, 2006.  
8 512 24. Hibell B, Guttormsson U, Ahlström S, et al. The 2011 ESPAD  
9 513 Report. Substance use among students in 2012;**36**  
10 514 25. National Audit Office. Emergency admissions to hospital:  
11 515 managing the demand, 2013.  
12 516 | 26. Scott D, Tonmyr L, Fraser J, et al. The utility and challenges of  
13 517 using ICD codes in child maltreatment research: A review of  
14 518 existing literature. *Child abuse & neglect* 2009;**33**(11):791-808  
15 519 doi: S0145-2134(09)00202-6 [pii]  
16 520 10.1016/j.chiabu.2009.08.005[published Online First: Epub Date]].  
17 521 | 27. McKenzie K, Harrison JE, McClure RJ. Identification of alcohol  
18 522 involvement in injury-related hospitalisations using routine  
19 523 data compared to medical record review. *Australian and New*  
20 524 *Zealand journal of public health* 2010;**34**(2):146-52 doi:  
21 525 10.1111/j.1753-6405.2010.00499.x[published Online First:  
22 526 Epub Date]].  
23 527 28. Farrar S, Yi D, Sutton M, et al. Has payment by results affected the  
24 528 way that English hospitals provide care? Difference-in-  
25 529 differences analysis. *Bmj* 2009;**339** doi:  
26 530 10.1136/bmj.b3047[published Online First: Epub Date]].  
27 531 29. Hawton K, Rodham K, Evans E, et al. Adolescents Who Self Harm:  
28 532 A Comparison of Those Who Go to Hospital and Those Who Do  
29 533 Not. *Child Adol Ment H-Uk* 2009;**14**(1):24-30 doi: DOI  
30 534 10.1111/j.1475-3588.2008.00485.x[published Online First:  
31 535 Epub Date]].  
32 536 30. What to do if you're worried that a child is being abused. In: Skills  
33 537 DfE, ed.: DfES Publications, 2006.  
34 538 31. *Self-harm. The short term physical and psychological management*  
35 539 *and secondary prevention of self-harm in primary and secondary*  
36 540 *care*. London: National Institute for Health and Clinical  
37 541 Excellence, 2011.  
38 542 32. *Drug misuse: Psychosocial interventions*. London: National  
39 543 Institute for Health and Clinical Excellence, 2007.  
40 544 33. Alcohol-use disorder : diagnosis, assessment and management of  
41 545 harmful drinking and alcohol dependence. London: National  
42 546 Institute for Health and Care Excellence, 2011.  
43 547 34. Viner RM, Ozer EM, Denny S, et al. Adolescence and the social  
44 548 determinants of health. *Lancet* 2012;**379**(9826):1641-52 doi:  
45 549 10.1016/S0140-6736(12)60149-4[published Online First:  
46 550 Epub Date]].

Formatted: Font: Cambria, 14 pt, French (France), Do not check spelling or grammar

Formatted: Font: Cambria, 14 pt, French (France), Do not check spelling or grammar

- 1  
2  
3  
4  
5  
6 551 35. Hospital Episode Statistics Accident & Emergency (England),  
7 552 2007-. Secondary Hospital Episode Statistics Accident &  
8 553 Emergency (England), 2007-.  
9 554 <http://adn.ac.uk/catalogue/cataloguepage?sn=888040>.  
10 555  
11  
12  
13  
14  
15  
16  
17  
18  
19  
20  
21  
22  
23  
24  
25  
26  
27  
28  
29  
30  
31  
32  
33  
34  
35  
36  
37  
38  
39  
40  
41  
42  
43  
44  
45  
46  
47  
48  
49  
50  
51  
52  
53  
54  
55  
56  
57  
58  
59  
60

For peer review only

1  
2  
3  
4  
5  
6  
7  
8  
9  
10  
11  
12  
13  
14  
15  
16  
17  
18  
19  
20  
21  
22  
23  
24  
25  
26  
27  
28  
29  
30  
31  
32  
33  
34  
35  
36  
37  
38  
39  
40  
41  
42  
43  
44  
45  
46  
47  
48  
49  
50  
51  
52  
53  
54  
55  
56  
57  
58  
59  
60

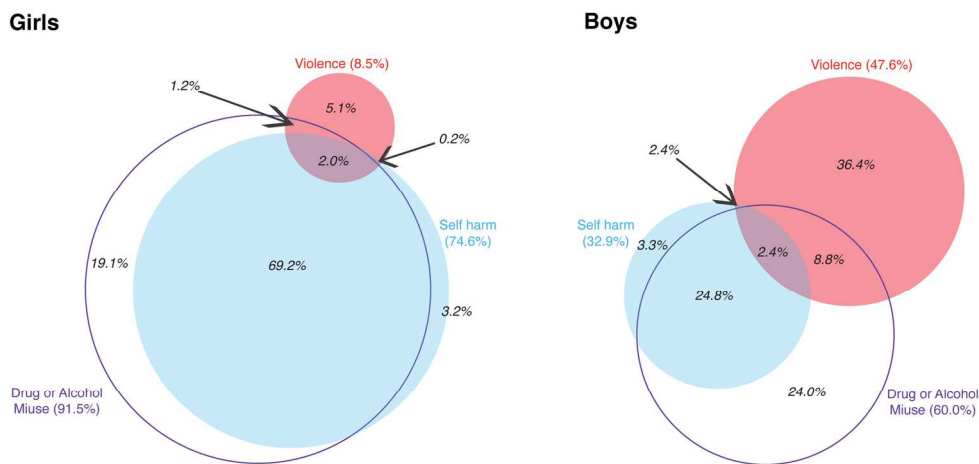

Number (%) of adolescents with adversity-related injury, by types of adversity between 10 and 19 years old\* and sex

\*Each adolescent classified by all adversity recorded at any emergency admission(s) for injury between 10 and 19 years old  
173x86mm (300 x 300 DPI)

Review only

1  
2  
3  
4  
5  
6  
7  
8  
9  
10  
11  
12  
13  
14  
15  
16  
17  
18  
19  
20  
21  
22  
23  
24  
25  
26  
27  
28  
29  
30  
31  
32  
33  
34  
35  
36  
37  
38  
39  
40  
41  
42  
43  
44  
45  
46  
47  
48  
49  
50  
51  
52  
53  
54  
55  
56  
57  
58  
59  
60

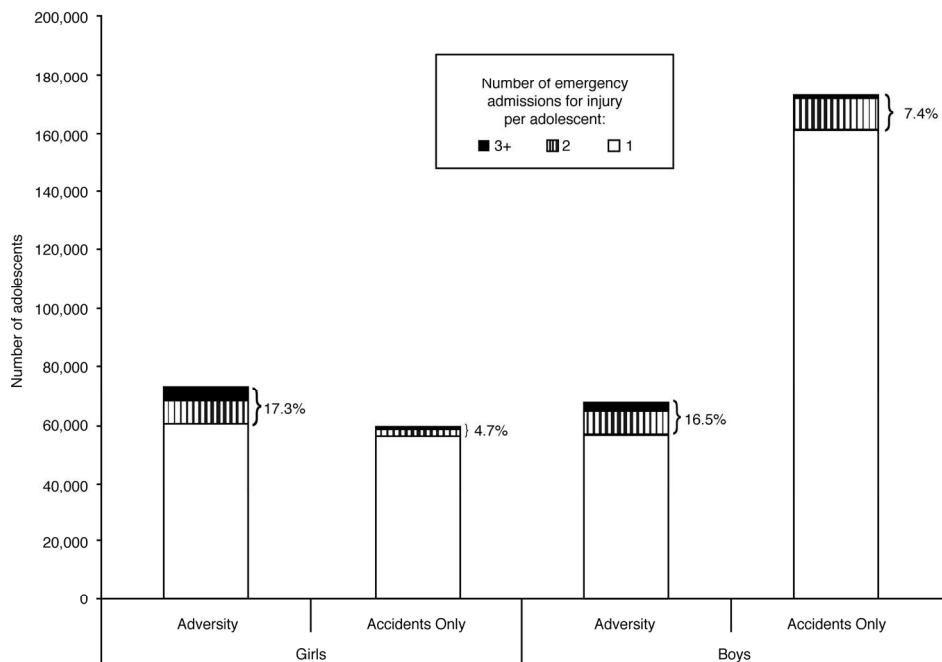

Number of adolescents with 1, 2 and 3 or more emergency admission(s) for injury between 10 and 19 years old\*, by types of injury between 10 and 19 years old\*\* and sex

\*Percentages are of adolescents who have 2 or more emergency admissions for injury between 10 and 19 years old

\*\*Each adolescent was classified by all adversity/accidents recorded at any emergency admission(s) for injury  
173x125mm (300 x 300 DPI)

only

## Supplementary Tables

**Supplementary Table 1.** Cohort (shaded) who have at least one emergency admission for injury between 10 and 19 years old in 1998-2011 (N = 402,916)

| 1998 | 1999 | 2000 | 2001 | 2002 | ... | 2007 | 2008 | 2009 | 2010 | 2011 |
|------|------|------|------|------|-----|------|------|------|------|------|
| 6    | 7    | 8    | 9    | 10   | ... | 15   | 16   | 17   | 18   | 19   |
| 7    | 8    | 9    | 10   | 11   | ... | 16   | 17   | 18   | 19   | 20   |
| 8    | 9    | 10   | 11   | 12   | ... | 17   | 18   | 19   | 20   | 21   |
| 9    | 10   | 11   | 12   | 13   | ... | 18   | 19   | 20   | 21   | 22   |
| 10   | 11   | 12   | 13   | 14   | ... | 19   | 20   | 21   | 22   | 23   |

**Supplementary Table 2.** Definitions and International Classification of Diseases (ICD-10) diagnostic codes used to classify emergency admissions for injury, chronic conditions and types of adversity\*

---

### ADMISSIONS AND ADMISSION TYPES

---

#### Admission

Admissions were defined by linked episodes of inpatient care, including day cases (any case > 4 hours stay). Any admission which occurred within one day or was a hospital transfer from a previous admission was considered to be the same admission. An episode may have up to 20 diagnosis codes entered, but 88% of admissions in this cohort had episodes with four or less diagnoses recorded (data not shown).

#### Emergency (acute; unplanned) admission

An admission was considered to be an emergency if the method of admission variable ('admimeth') was 21-24 or 28.(1)

#### Injury

An admission was considered to be for injury if any of the diagnosis codes in the first episode of the admission were S or T codes (Chapter XIX of the ICD -10).

---

### CHRONIC CONDITIONS

---

ICD-10 codes as per Hardelid et al, 2013,(2) excluding E24.4, F10-F19, G31.2, G40.5, G62.1, G72.1, K29.2, K70, K85.2, K86.0, O35.4, R78.1-R78.5, Z50.2, Z50.3, Z86.4, X64-X84, Y10-Y34, Z91.5, F30.0-F30.2, F30.8-F32.3, F32.8-F334, F33.8-F34.1, F34.8-F34.9, F38.0-F38.1, F38.8, F39-F40.2, F40.8- F41.3, F41.8-F41.9.

---

### ADVERSITY CLUSTERS AND DESCRIPTIONS\*

### ICD-10 CODES

---

#### Violence

##### *Maltreatment*

Maltreatment syndromes

T74

Effects of other deprivation (extreme neglect)

T73

Perpetrator of neglect and other maltreatment syndromes

Y06, Y07

##### *Assault*

Assault by bodily force and sexual assault

Y04, Y05

Other types of assault

X85 - Y03, Y08 - Y09

##### *Undetermined cause*

Events of undetermined intent

Y20 - Y34

Examination and observation following other inflicted injury

Z04.5

Examination and observation for other reasons: request

Z04.8

for expert evidence

#### Self-harm

##### *Intentional self-poisoning by and exposure to...*

...drugs

X60-X63

...other and unspecified drugs, medicaments and

X64

biological substances

...alcohol

X65

...organic solvents and halogenated hydrocarbons and

X66

their vapours

...other gases and vapours

X67

...pesticides

X68

...other and unspecified chemicals and noxious

X69

|    |                                                                     |                       |
|----|---------------------------------------------------------------------|-----------------------|
| 1  |                                                                     |                       |
| 2  |                                                                     |                       |
| 3  | substances                                                          |                       |
| 4  | <i>Intentional self-harm by...</i>                                  |                       |
| 5  | ...hanging, strangulation and suffocation                           | X70                   |
| 6  | ...drowning and submersion                                          | X71                   |
| 7  | ...firearm discharge                                                | X72-X74               |
| 8  | ...explosive material                                               | X75                   |
| 9  | ...smoke, fire and flames, or steam, hot vapours and hot            |                       |
| 10 | objects                                                             | X76-X77               |
| 11 | ...sharp/blunt objects                                              | X78-X79               |
| 12 | ...jumping from a high place                                        | X80                   |
| 13 | ...jumping or lying before a moving object, or crashing a           |                       |
| 14 | motor vehicle                                                       | X81-82                |
| 15 | ...other specified means                                            | X83                   |
| 16 | ...unspecified means                                                | X84                   |
| 17 | <i>Personal history of self-harm</i>                                | Z91.5                 |
| 18 |                                                                     |                       |
| 19 |                                                                     |                       |
| 20 |                                                                     |                       |
| 21 | <b>Drug or alcohol misuse</b>                                       |                       |
| 22 | <i>Drugs, medicaments and biological substances (illicit drugs)</i> |                       |
| 23 | Mental and behavioural disorders due to psychoactive                |                       |
| 24 | substance use                                                       | F11 - F17, F19        |
| 25 | Finding of drugs not normally found in blood                        | R78.1 - R78.5         |
| 26 | Poisoning by drugs, medicaments and biological                      | T36 - T50             |
| 27 | substances                                                          | (not including T50.6) |
| 28 | Poisoning, undetermined intent                                      | Y10 - Y14             |
| 29 | Drug rehabilitation                                                 | Z50.3                 |
| 30 | Drug abuse counselling and surveillance                             | Z71.5                 |
| 31 | Drug use                                                            | Z72.2                 |
| 32 | <i>Environmental/ Domestic substances</i>                           |                       |
| 33 | Mental and behavioural disorders due to use of volatile             |                       |
| 34 | solvents                                                            | F18                   |
| 35 | Accidental poisoning by and exposure to noxious                     |                       |
| 36 | substances                                                          | X40 - X44, X46 - X49  |
| 37 | Intentional self-poisoning by and exposure to noxious               |                       |
| 38 | substances                                                          | X69                   |
| 39 | Poisoning by chemical or noxious substance,                         |                       |
| 40 | undetermined intent                                                 | Y16 - Y19             |
| 41 | <i>Codes mentioning both alcohol and drugs</i>                      |                       |
| 42 | Special epileptic syndromes - (related to alcohol, drugs,           |                       |
| 43 | etc.)                                                               | G40.5                 |
| 44 | Blood-alcohol and blood-drug test                                   | Z04.0                 |
| 45 | <i>Alcohol</i>                                                      |                       |
| 46 | Alcohol-induced pseudo-Cushing's syndrome                           | E24.4                 |
| 47 | Mental and behavioural disorders due to use of alcohol              | F10                   |
| 48 | Degeneration of nervous system due to alcohol                       | G31.2                 |
| 49 | Alcoholic polyneuropathy                                            | G62.1                 |
| 50 | Alcoholic myopathy                                                  | G72.1                 |
| 51 | Alcoholic cardiomyopathy                                            | I42.1                 |
| 52 | Alcoholic gastritis                                                 | K29.2                 |
| 53 | Alcoholic liver disease                                             | K70                   |
| 54 | Alcohol-induced acute pancreatitis                                  | K85.2                 |
| 55 |                                                                     |                       |
| 56 |                                                                     |                       |
| 57 |                                                                     |                       |
| 58 |                                                                     |                       |
| 59 |                                                                     |                       |
| 60 |                                                                     |                       |

|    |                                                          |           |
|----|----------------------------------------------------------|-----------|
| 1  |                                                          |           |
| 2  |                                                          |           |
| 3  | Alcohol-induced chronic pancreatitis                     | K86.0     |
| 4  | Maternal care for (suspected) damage to fetus from       |           |
| 5  | alcohol                                                  | O35.4     |
| 6  |                                                          |           |
| 7  |                                                          |           |
| 8  | Finding of alcohol in blood                              | R78.0     |
| 9  | Poisoning: antidotes and chelating agents, not elsewhere |           |
| 10 | classified                                               | T50.6     |
| 11 | Toxic effect of alcohol                                  | T51       |
| 12 | Accidental poisoning by exposure to alcohol              | X45       |
| 13 |                                                          |           |
| 14 |                                                          |           |
| 15 | Poisoning by exposure to alcohol, undetermined intent    | Y15       |
| 16 | Evidence of alcohol involvement determined by blood      |           |
| 17 | alcohol level                                            | Y90       |
| 18 | Evidence of alcohol involvement determined by level of   |           |
| 19 | intoxication                                             | Y91       |
| 20 | Alcohol rehabilitation                                   | Z50.2     |
| 21 | Alcohol abuse counselling and surveillance               | Z71.4     |
| 22 | Alcohol use                                              | Z72.1     |
| 23 |                                                          |           |
| 24 |                                                          |           |
| 25 | <b>Accidents</b>                                         |           |
| 26 | Transport accidents                                      | V01 - V99 |
| 27 | Falls                                                    | W00 - W19 |
| 28 | Exposure to inanimate mechanical forces                  | W20 - W49 |
| 29 | Exposure to animate mechanical forces                    | W50 - W64 |
| 30 | Accidental drowning and submersion                       | W65 - W74 |
| 31 | Other accidental threats to breathing                    | W75 - W84 |
| 32 | Exposure to electric current, radiation and extreme      |           |
| 33 | ambient air temperature and pressure                     | W85 - W99 |
| 34 | Exposure to smoke, fire and flames                       | X00 - X09 |
| 35 | Contact with heat and hot substances                     | X10 - X19 |
| 36 | Contact with venomous animals and plants                 | X20 - X29 |
| 37 | Exposure to forces of nature                             | X30 - X39 |
| 38 | Accidental poisoning by and exposure to noxious          |           |
| 39 | substances                                               | X40 - X49 |
| 40 | Overexertion, travel and privation                       | X50 - X57 |
| 41 | Accidental exposure to other and unspecified factors     | X58 - X59 |
| 42 |                                                          |           |
| 43 |                                                          |           |
| 44 |                                                          |           |
| 45 |                                                          |           |
| 46 |                                                          |           |
| 47 |                                                          |           |
| 48 |                                                          |           |
| 49 |                                                          |           |
| 50 |                                                          |           |
| 51 |                                                          |           |
| 52 |                                                          |           |
| 53 |                                                          |           |
| 54 |                                                          |           |
| 55 |                                                          |           |
| 56 |                                                          |           |
| 57 |                                                          |           |
| 58 |                                                          |           |
| 59 |                                                          |           |
| 60 |                                                          |           |



**Supplementary Table 3.** Population prevalence\* (per 100,000) of emergency admission(s) for injury, by types of adversity within age periods\*\* and sex

|                             | <b>All girls</b> | <b>All boys</b> | <b>Girls</b>  |               |               | <b>Boys</b>   |                |                |
|-----------------------------|------------------|-----------------|---------------|---------------|---------------|---------------|----------------|----------------|
| <b>Adolescent group**</b>   | <b>10-19y</b>    | <b>10-19y</b>   | <b>10-14y</b> | <b>15-17y</b> | <b>18-19y</b> | <b>10-14y</b> | <b>15-17y</b>  | <b>18-19y</b>  |
| All                         | 9,073            | 16,333‡         | 4,104         | 3,260§        | 2,189§        | 7,316‡        | 5,069‡§        | 3,852‡§        |
| <b>Adversity</b>            | <b>4,582</b>     | <b>4,108‡</b>   | <b>1,240</b>  | <b>2,124§</b> | <b>1,329§</b> | <b>669‡</b>   | <b>1,458‡§</b> | <b>1,748‡§</b> |
| Any violence                | 391              | 1,970‡          | 103           | 152§          | 110           | 277‡          | 731‡§          | 833‡§          |
| Any self-harm               | 3,418            | 1,266‡          | 777           | 1,463§        | 923§          | 170‡          | 393‡§          | 478‡§          |
| Any drug or alcohol misuse  | 4,194            | 2,463‡          | 1,112         | 1,959§        | 1,221§        | 375‡          | 807‡§          | 1,077‡§        |
| <b>Single adversity</b>     | <b>1,254</b>     | <b>2616‡</b>    | <b>495</b>    | <b>687§</b>   | <b>412§</b>   | <b>516</b>    | <b>991‡§</b>   | <b>1,114‡§</b> |
| Violence only               | 235              | 1,496‡          | 77            | 99§           | 75            | 256‡          | 609‡§          | 635‡§          |
| Self-harm only              | 144              | 136             | 48            | 63§           | 31§           | 37‡           | 39             | 34             |
| Drug or alcohol misuse only | 874              | 984‡            | 369           | 525§          | 305§          | 224‡          | 342‡§          | 445‡§          |
| <b>Multiple adversity</b>   | <b>3,328</b>     | <b>1,492‡</b>   | <b>745</b>    | <b>1,436§</b> | <b>917§</b>   | <b>153‡</b>   | <b>467‡§</b>   | <b>634‡§</b>   |
| V+SH                        | 8                | 13‡             | 3             | 3             | 1§            | 1‡            | 2              | 2              |
| V+DA                        | 54               | 361‡            | 17            | 37§           | 26§           | 19            | 114‡§          | 190‡§          |
| SH+DA                       | 3,172            | 1,018‡          | 720           | 1,384§        | 882§          | 131‡          | 345‡§          | 436‡§          |
| V+SH+DA                     | 93               | 100‡            | 6             | 13§           | 8             | 2‡            | 5‡§            | 6§             |
| No adversity                | 4,491            | 11,417‡         | 2,676         | 1,136§        | 860§          | 6,648‡        | 3,611‡         | 2,171‡§        |
| <b>Accidents only</b>       | <b>748</b>       | <b>10,466‡</b>  | <b>2,221</b>  | <b>804§</b>   | <b>580§</b>   | <b>5,887‡</b> | <b>3,109‡</b>  | <b>1,784‡§</b> |
| <b>Other causes</b>         | <b>3,742</b>     | <b>951‡</b>     | <b>455</b>    | <b>332§</b>   | <b>279§</b>   | <b>761‡</b>   | <b>503‡</b>    | <b>388‡§</b>   |

1  
2  
3  
4  
5  
6  
7 V = Violence, SH = Self-harm, DA = Drug or Alcohol Misuse

8 \*Due to large denominators, confidence intervals for population prevalence were too narrow to provide any meaningful  
9 interpretation and so are not shown.

10 \*\*Each adolescent classified by all adversity/accidents seen at any emergency injury admission(s) at 10-19 years, 10-14 years, 15-  
11 17 years and 18-19 years, respectively.

12 ‡Statistically significantly different from girls of the same age (according to 95% confidence intervals).

13 §Statistically significantly different from 10-14 year olds of the same sex (according to 95% confidence intervals).  
14  
15  
16  
17  
18  
19  
20  
21  
22  
23  
24  
25  
26  
27  
28  
29  
30  
31  
32  
33  
34  
35  
36  
37  
38  
39  
40  
41  
42  
43  
44  
45  
46  
47  
48  
49

1  
2  
3  
4  
5  
6  
7  
8  
9  
10  
11  
12  
13  
14  
15  
16  
17  
18  
19  
20  
21  
22  
23  
24  
25  
26  
27  
28  
29  
30  
31  
32  
33  
34  
35  
36  
37  
38  
39  
40  
41  
42  
43  
44  
45  
46  
47  
48  
49

**REFERENCES**

1. Inpatient HES Data Dictionary. Leeds: Health and Social Care Information Centre, 2010.  
2. Hardelid P DN, Davey J, Primbramska I, Gilbert R. Overview of child deaths in the four UK countries. London: 2013.

For peer review only

1  
2  
3  
4  
5  
6  
7  
8  
9  
10  
11  
12  
13  
14  
15  
16  
17  
18  
19  
20  
21  
22  
23  
24  
25  
26  
27  
28  
29  
30  
31  
32  
33  
34  
35  
36  
37  
38  
39  
40  
41  
42  
43  
44  
45  
46  
47  
48  
49  
50  
51  
52  
53  
54  
55  
56  
57  
58  
59  
60

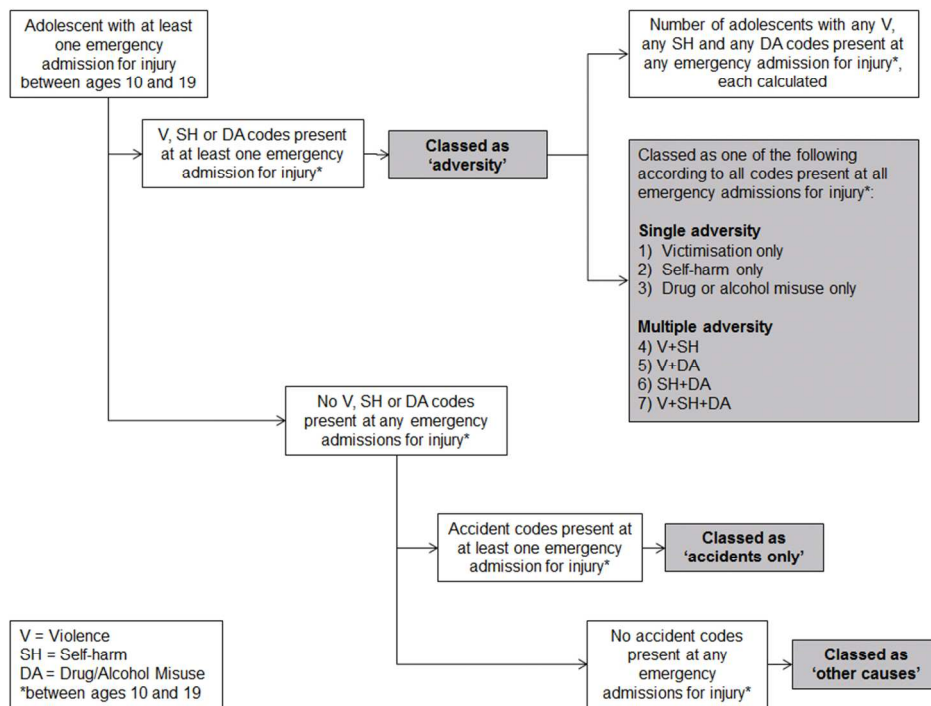

Classification of groups of adolescents

\*between ages 10 and 19

Peer review only

1  
2  
3  
4  
5  
6  
7  
8  
9  
10  
11  
12  
13  
14  
15  
16  
17  
18  
19  
20  
21  
22  
23  
24  
25  
26  
27  
28  
29  
30  
31  
32  
33  
34  
35  
36  
37  
38  
39  
40  
41  
42  
43  
44  
45  
46  
47  
48  
49  
50  
51  
52  
53  
54  
55  
56  
57  
58  
59  
60

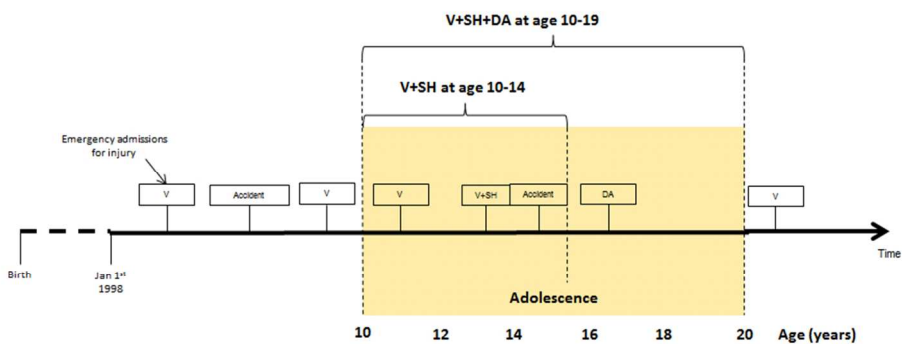

Supplementary Figure 2. Example of classification of groups of adolescents within age groups and across adolescence (ages 10-19).

V = victimisation, SH = self-harm, DA = drug or alcohol misuse.  
254x102mm (96 x 96 DPI)

er review only

Supplementary Tables

**Supplementary Table 1.** Cohort (shaded) who have at least one emergency admission for injury between 10 and 19 years old in 1998-2011 (N = 402,916)

| 1998 | 1999 | 2000 | 2001 | 2002 | ... | 2007 | 2008 | 2009 | 2010 | 2011 |
|------|------|------|------|------|-----|------|------|------|------|------|
| 6    | 7    | 8    | 9    | 10   | ... | 15   | 16   | 17   | 18   | 19   |
| 7    | 8    | 9    | 10   | 11   | ... | 16   | 17   | 18   | 19   | 20   |
| 8    | 9    | 10   | 11   | 12   | ... | 17   | 18   | 19   | 20   | 21   |
| 9    | 10   | 11   | 12   | 13   | ... | 18   | 19   | 20   | 21   | 22   |
| 10   | 11   | 12   | 13   | 14   | ... | 19   | 20   | 21   | 22   | 23   |

**Supplementary Table 2.** Definitions and International Classification of Diseases (ICD-10) diagnostic codes used to classify emergency admissions for injury, chronic conditions and types of adversity\*

---

### ADMISSIONS AND ADMISSION TYPES

---

#### Admission

Admissions were defined by linked episodes of inpatient care, including day cases (any case > 4 hours stay). Any admission which occurred within one day or was a hospital transfer from a previous admission was considered to be the same admission. An episode may have up to 20 diagnosis codes entered, but 88% of admissions in this cohort had episodes with four or less diagnoses recorded (data not shown).

#### Emergency (acute; unplanned) admission

An admission was considered to be an emergency if the method of admission variable ('admission') was 21-24 or 28.(1)

#### Injury

An admission was considered to be for injury if any of the diagnosis codes in the first episode of the admission were S or T codes (Chapter XIX of the ICD -10).

---

### CHRONIC CONDITIONS

---

ICD-10 codes as per Hardelid et al, 2013,(2) excluding E24.4, F10-F19, G31.2, G40.5, G62.1, G72.1, K29.2, K70, K85.2, K86.0, O35.4, R78.1-R78.5, Z50.2, Z50.3, Z86.4, X64-X84, Y10-Y34, Z91.5, F30.0-F30.2, F30.8-F32.3, F32.8-F334, F33.8-F34.1, F34.8-F34.9, F38.0-F38.1, F38.8, F39-F40.2, F40.8- F41.3, F41.8-F41.9.

---

### ADVERSITY CLUSTERS AND DESCRIPTIONS\*

### ICD-10 CODES

---

#### **Victimisation**

|                                                                                   |                      |
|-----------------------------------------------------------------------------------|----------------------|
| <b>Violence</b>                                                                   |                      |
| <i>Maltreatment</i>                                                               |                      |
| Maltreatment syndromes                                                            | T74                  |
| Effects of other deprivation (extreme neglect)                                    | T73                  |
| Perpetrator of neglect and other maltreatment syndromes                           | Y06, Y07             |
| <i>Assault</i>                                                                    |                      |
| Assault by bodily force and sexual assault                                        | Y04, Y05             |
| Other types of assault                                                            | X85 - Y03, Y08 - Y09 |
| <i>Undetermined cause</i>                                                         |                      |
| Events of undetermined intent                                                     | Y20 - Y34            |
| Examination and observation following other inflicted injury                      | Z04.5                |
| Examination and observation for other reasons: request for expert evidence        | Z04.8                |
| <del>— Adverse social circumstances</del>                                         |                      |
| <del>— Neonatal withdrawal symptoms from maternal use of drugs of addiction</del> | <del>P96.1</del>     |
| <del>— Other problems related to physical environment</del>                       | <del>Z58.8</del>     |
| <del>— Problem related to physical environment, unspecified</del>                 | <del>Z58.9</del>     |
| <del>— Homelessness</del>                                                         | <del>Z59.0</del>     |
| <del>— Inadequate housing</del>                                                   | <del>Z59.1</del>     |
| <del>— Lack of adequate food</del>                                                | <del>Z59.4</del>     |
| <del>— Extreme poverty</del>                                                      | <del>Z59.5</del>     |
| <del>— Insufficient social insurance and welfare support</del>                    | <del>Z59.7</del>     |
| <del>— Problem related to housing and economic circumstances, unspecified</del>   | <del>Z59.9</del>     |

|    |                                                          |             |
|----|----------------------------------------------------------|-------------|
| 1  |                                                          |             |
| 2  |                                                          |             |
| 3  |                                                          |             |
| 4  |                                                          |             |
| 5  |                                                          |             |
| 6  | —Problems related to social environment                  | Z60         |
| 7  | —Problems related to negative life events in childhood   | Z61         |
| 8  | —Other problems related to upbringing                    | Z62         |
| 9  | —Other problems related to primary support group         | Z63         |
| 10 | —Discord with counsellors                                | Z64.4       |
| 11 | —Problems related to other legal circumstances           | Z65.3       |
| 12 | —Other specified problems related to psychosocial        | Z65.8       |
| 13 | circumstances                                            |             |
| 14 | —Problem related to unspecified psychosocial             | Z65.9       |
| 15 | circumstances                                            |             |
| 16 | —Problems related to lifestyle                           | Z72.3—Z72.9 |
| 17 | —Problems related to care provider dependency            | Z74         |
| 18 | —Health supervision and care of foundling                | Z76.1       |
| 19 | —Health supervision and care of other healthy infant and | Z76.2       |
| 20 | child                                                    |             |
| 21 | —Family history of mental and behavioural disorders      | Z81         |
| 22 | —Personal history of other specified risk factors, not   | Z91.8       |
| 23 | elsewhere classified                                     |             |

### Self-harm

|    |                                                           |         |
|----|-----------------------------------------------------------|---------|
| 24 |                                                           |         |
| 25 |                                                           |         |
| 26 | <i>Intentional self-poisoning by and exposure to...</i>   |         |
| 27 | ...drugs                                                  | X60-X63 |
| 28 | ...other and unspecified drugs, medicaments and           | X64     |
| 29 | biological substances                                     |         |
| 30 | ...alcohol                                                | X65     |
| 31 | ...organic solvents and halogenated hydrocarbons and      | X66     |
| 32 | their vapours                                             |         |
| 33 | ...other gases and vapours                                | X67     |
| 34 | ...pesticides                                             | X68     |
| 35 | ...other and unspecified chemicals and noxious            | X69     |
| 36 | substances                                                |         |
| 37 | <i>Intentional self-harm by...</i>                        |         |
| 38 | ...hanging, strangulation and suffocation                 | X70     |
| 39 | ...drowning and submersion                                | X71     |
| 40 | ...firearm discharge                                      | X72-X74 |
| 41 | ...explosive material                                     | X75     |
| 42 | ...smoke, fire and flames, or steam, hot vapours and hot  | X76-X77 |
| 43 | objects                                                   |         |
| 44 | ...sharp/blunt objects                                    | X78-X79 |
| 45 | ...jumping from a high place                              | X80     |
| 46 | ...jumping or lying before a moving object, or crashing a | X81-82  |
| 47 | motor vehicle                                             |         |
| 48 | ...other specified means                                  | X83     |
| 49 | ...unspecified means                                      | X84     |
| 50 | <i>Personal history of self-harm</i>                      | Z91.5   |

### ~~Alcohol~~Drug or alcohol misuse

|    |                                                         |       |
|----|---------------------------------------------------------|-------|
| 51 |                                                         |       |
| 52 | — <del>Alcohol</del>                                    |       |
| 53 | —Alcohol-induced pseudo-Cushing's syndrome              | E24.4 |
| 54 | —Mental and behavioural disorders due to use of alcohol | F10   |
| 55 |                                                         |       |
| 56 |                                                         |       |
| 57 |                                                         |       |
| 58 |                                                         |       |
| 59 |                                                         |       |
| 60 |                                                         |       |



|    |                                                                                  |                       |
|----|----------------------------------------------------------------------------------|-----------------------|
| 1  |                                                                                  |                       |
| 2  |                                                                                  |                       |
| 3  |                                                                                  |                       |
| 4  |                                                                                  |                       |
| 5  |                                                                                  |                       |
| 6  | <del>— Degeneration of nervous system due to alcohol</del>                       | <del>G31.2</del>      |
| 7  | <del>— Alcoholic polyneuropathy</del>                                            | <del>G62.1</del>      |
| 8  | <del>— Alcoholic myopathy</del>                                                  | <del>G72.1</del>      |
| 9  | <del>— Alcoholic cardiomyopathy</del>                                            | <del>I42.1</del>      |
| 10 | <del>— Alcoholic gastritis</del>                                                 | <del>K29.2</del>      |
| 11 | <del>— Alcoholic liver disease</del>                                             | <del>K70</del>        |
| 12 | <del>— Alcohol-induced acute pancreatitis</del>                                  | <del>K85.2</del>      |
| 13 | <del>— Alcohol-induced chronic pancreatitis</del>                                | <del>K86.0</del>      |
| 14 | <del>— Maternal care for (suspected) damage to fetus from</del>                  |                       |
| 15 | <del>alcohol</del>                                                               | <del>O35.4</del>      |
| 16 | <del>— Fetus and newborn affected by maternal use of alcohol<sup>†</sup></del>   | <del>P04.3</del>      |
| 17 | <del>— Fetal alcohol syndrome (dysmorphic)<sup>†</sup></del>                     | <del>Q86.0</del>      |
| 18 | <del>— Finding of alcohol in blood</del>                                         | <del>R78.0</del>      |
| 19 | <del>— Poisoning: antidotes and chelating agents, not elsewhere</del>            |                       |
| 20 | <del>classified</del>                                                            | <del>T50.6</del>      |
| 21 | <del>— Toxic effect of alcohol</del>                                             | <del>T51</del>        |
| 22 | <del>— Accidental poisoning by exposure to alcohol</del>                         | <del>X45</del>        |
| 23 | <del>— Intentional self poisoning by and exposure to alcohol**</del>             | <del>X65</del>        |
| 24 | <del>— Poisoning by exposure to alcohol, undetermined intent</del>               | <del>Y15</del>        |
| 25 | <del>— Evidence of alcohol involvement determined by blood</del>                 |                       |
| 26 | <del>alcohol level</del>                                                         | <del>Y90</del>        |
| 27 | <del>— Evidence of alcohol involvement determined by level of</del>              |                       |
| 28 | <del>intoxication<sup>‡</sup></del>                                              | <del>Y91</del>        |
| 29 | <del>— Alcohol rehabilitation</del>                                              | <del>Z50.2</del>      |
| 30 | <del>— Alcohol abuse counselling and surveillance</del>                          | <del>Z71.4</del>      |
| 31 | <del>— Alcohol use<sup>‡</sup></del>                                             | <del>Z72.1</del>      |
| 32 | <i>Drugs, medicaments and biological substances (illicit drugs)</i>              |                       |
| 33 | Mental and behavioural disorders due to psychoactive                             |                       |
| 34 | substance use                                                                    | F11 - F17, F19        |
| 35 | <del>— Maternal care for (suspected) damage to fetus by drugs<sup>‡</sup></del>  | <del>O35.5</del>      |
| 36 | <del>— Neonatal jaundice due to drugs or toxins transmitted from</del>           |                       |
| 37 | <del>mother or given to newborn<sup>†</sup></del>                                | <del>P58.4</del>      |
| 38 | <del>— Neonatal withdrawal symptoms from maternal use of</del>                   |                       |
| 39 | <del>drugs of addiction<sup>‡</sup></del>                                        | <del>P96.1</del>      |
| 40 | Finding of drugs not normally found in blood                                     | R78.1 - R78.5         |
| 41 | Poisoning by drugs, medicaments and biological                                   | T36 - T50             |
| 42 | substances                                                                       | (not including T50.6) |
| 43 | <del>— Intentional self poisoning by and exposure to antiepileptic,</del>        |                       |
| 44 | <del>sedative hypnotic, antiparkinsonism and psychotropic drugs,</del>           | <del>X61</del>        |
| 45 | <del>not elsewhere classified**</del>                                            |                       |
| 46 | <del>— Intentional self poisoning by and exposure to other drugs</del>           |                       |
| 47 | <del>acting on the autonomic nervous system**</del>                              | <del>X63</del>        |
| 48 | <del>— Intentional self poisoning by and exposure to other and</del>             |                       |
| 49 | <del>unspecified drugs, medicaments and biological substances**</del>            | <del>X64</del>        |
| 50 | <del>— Assault by drugs, medicaments and biological substances<sup>§</sup></del> | <del>X85</del>        |
| 51 | Poisoning, undetermined intent                                                   | Y10 - Y14             |
| 52 | Drug rehabilitation                                                              | Z50.3                 |
| 53 | Drug abuse counselling and surveillance                                          | Z71.5                 |
| 54 | Drug use                                                                         | Z72.2                 |
| 55 | <i>Environmental/ Domestic substances</i>                                        |                       |
| 56 |                                                                                  |                       |
| 57 |                                                                                  |                       |
| 58 |                                                                                  |                       |
| 59 |                                                                                  |                       |
| 60 |                                                                                  |                       |

Formatted: French (France)

|    |                                                                                |                      |
|----|--------------------------------------------------------------------------------|----------------------|
| 1  |                                                                                |                      |
| 2  |                                                                                |                      |
| 3  |                                                                                |                      |
| 4  |                                                                                |                      |
| 5  |                                                                                |                      |
| 6  | Mental and behavioural disorders due to use of volatile                        | F18                  |
| 7  | solvents                                                                       |                      |
| 8  | Accidental poisoning by and exposure to noxious                                | X40 – X44, X46 - X49 |
| 9  | substances                                                                     |                      |
| 10 | <del>Intentional self-poisoning by and exposure to organic</del>               | <del>X66</del>       |
| 11 | <del>solvents and halogenated hydrocarbons and their vapours<sup>‡</sup></del> |                      |
| 12 | Intentional self-poisoning by and exposure to noxious                          | X69                  |
| 13 | substances                                                                     |                      |
| 14 | <del>Assault by unspecified chemical or noxious substance<sup>§</sup></del>    | <del>X90</del>       |
| 15 | Poisoning by chemical or noxious substance,                                    | Y16 - Y19            |
| 16 | undetermined intent                                                            |                      |
| 17 | <i>Codes mentioning both alcohol and drugs</i>                                 |                      |
| 18 | Special epileptic syndromes - (related to alcohol, drugs,                      | G40.5                |
| 19 | etc.)                                                                          |                      |
| 20 | Blood-alcohol and blood-drug test                                              | Z04.0                |
| 21 | <del>Personal history of psychoactive substance abuse-</del>                   | <del>Z86.4</del>     |
| 22 | <del>(alcohol, drug, tobacco)<sup>***</sup></del>                              |                      |
| 23 |                                                                                |                      |
| 24 | <u>Alcohol</u>                                                                 |                      |
| 25 | <u>Alcohol-induced pseudo-Cushing's syndrome</u>                               | <u>E24.4</u>         |
| 26 | <u>Mental and behavioural disorders due to use of alcohol</u>                  | <u>F10</u>           |
| 27 | <u>Degeneration of nervous system due to alcohol</u>                           | <u>G31.2</u>         |
| 28 | <u>Alcoholic polyneuropathy</u>                                                | <u>G62.1</u>         |
| 29 | <u>Alcoholic myopathy</u>                                                      | <u>G72.1</u>         |
| 30 | <u>Alcoholic cardiomyopathy</u>                                                | <u>I42.1</u>         |
| 31 | <u>Alcoholic gastritis</u>                                                     | <u>K29.2</u>         |
| 32 | <u>Alcoholic liver disease</u>                                                 | <u>K70</u>           |
| 33 | <u>Alcohol-induced acute pancreatitis</u>                                      | <u>K85.2</u>         |
| 34 | <u>Alcohol-induced chronic pancreatitis</u>                                    | <u>K86.0</u>         |
| 35 | <u>Maternal care for (suspected) damage to fetus from</u>                      | <u>O35.4</u>         |
| 36 | <u>alcohol</u>                                                                 |                      |
| 37 |                                                                                |                      |
| 38 |                                                                                |                      |
| 39 | <u>Finding of alcohol in blood</u>                                             | <u>R78.0</u>         |
| 40 | <u>Poisoning: antidotes and chelating agents, not elsewhere</u>                | <u>T50.6</u>         |
| 41 | <u>classified</u>                                                              |                      |
| 42 | <u>Toxic effect of alcohol</u>                                                 | <u>T51</u>           |
| 43 | <u>Accidental poisoning by exposure to alcohol</u>                             | <u>X45</u>           |
| 44 |                                                                                |                      |
| 45 | <u>Poisoning by exposure to alcohol, undetermined intent</u>                   | <u>Y15</u>           |
| 46 | <u>Evidence of alcohol involvement determined by blood</u>                     | <u>Y90</u>           |
| 47 | <u>alcohol level</u>                                                           |                      |
| 48 | <u>Evidence of alcohol involvement determined by level of</u>                  | <u>Y91</u>           |
| 49 | <u>intoxication</u>                                                            |                      |
| 50 | <u>Alcohol rehabilitation</u>                                                  | <u>Z50.2</u>         |
| 51 | <u>Alcohol abuse counselling and surveillance</u>                              | <u>Z71.4</u>         |
| 52 | <u>Alcohol use</u>                                                             | <u>Z72.1</u>         |
| 53 |                                                                                |                      |
| 54 | <b>Accidents</b>                                                               |                      |
| 55 | Transport accidents                                                            | V01 - V99            |
| 56 |                                                                                |                      |
| 57 |                                                                                |                      |
| 58 |                                                                                |                      |
| 59 |                                                                                |                      |
| 60 |                                                                                |                      |

1  
2  
3  
4  
5  
6  
7  
8  
9  
10  
11  
12  
13  
14  
15  
16  
17  
18  
19  
20  
21  
22  
23  
24  
25  
26  
27  
28  
29  
30  
31  
32  
33  
34  
35  
36  
37  
38  
39  
40  
41  
42  
43  
44  
45  
46  
47  
48  
49  
50  
51  
52  
53  
54  
55  
56  
57  
58  
59  
60

|                                                                                          |           |
|------------------------------------------------------------------------------------------|-----------|
| Falls                                                                                    | W00 - W19 |
| Exposure to inanimate mechanical forces                                                  | W20 - W49 |
| Exposure to animate mechanical forces                                                    | W50 - W64 |
| Accidental drowning and submersion                                                       | W65 - W74 |
| Other accidental threats to breathing                                                    | W75 - W84 |
| Exposure to electric current, radiation and extreme ambient air temperature and pressure | W85 - W99 |
| Exposure to smoke, fire and flames                                                       | X00 - X09 |
| Contact with heat and hot substances                                                     | X10 - X19 |
| Contact with venomous animals and plants                                                 | X20 - X29 |
| Exposure to forces of nature                                                             | X30 - X39 |
| Accidental poisoning by and exposure to noxious substances                               | X40 - X49 |
| Overexertion, travel and privation                                                       | X50 - X57 |
| Accidental exposure to other and unspecified factors                                     | X58 - X59 |

---

1  
2  
3  
4  
5  
6 \* ~~'Strikethrough' (Phrase, code) indicates that this was not included in the~~  
7 ~~adversity definition.~~

8 † ~~Codes relating to foetuses or neonates (P04.3, Q86.0, P58.4 and P96) were~~  
9 ~~not expected in adolescent presentations; this was checked and did not~~  
10 ~~appear.~~

11 ~~\*\* Formed part of the self harm cluster only; self poisoning considered most~~  
12 ~~egregious element of diagnosis.~~

13 ‡ ~~If subject under 18 years old.~~

14 § ~~Formed part of the victimisation cluster only; assault considered most~~  
15 ~~egregious element of the diagnosis.~~

16 ~~\*\*\*Not possible to distinguish whether for drugs, alcohol or tobacco~~  
17  
18  
19  
20  
21  
22  
23  
24  
25  
26  
27  
28  
29  
30  
31  
32  
33  
34  
35  
36  
37  
38  
39  
40  
41  
42  
43  
44  
45  
46  
47  
48  
49  
50  
51  
52  
53  
54  
55  
56  
57  
58  
59  
60

**Supplementary Table 3.** Population prevalence\* (per 100,000) of emergency admission(s) for injury, by types of adversity within age periods†<sup>\*\*</sup> and sex

| Adolescent group <sup>††</sup>                   | All girls                    | All boys                       | Girls                        |                               |                               | Boys                          |                                |                                |
|--------------------------------------------------|------------------------------|--------------------------------|------------------------------|-------------------------------|-------------------------------|-------------------------------|--------------------------------|--------------------------------|
|                                                  | 10-19y                       | 10-19y                         | 10-14y                       | 15-17y                        | 18-19y                        | 10-14y                        | 15-17y                         | 18-19y                         |
| All                                              | 9,073 <sup>8-66</sup>        | 16,333 <sup>±16-27</sup> ‡     | 4,104 <sup>3-92</sup>        | 3,260 <sup>§3-12</sup> §      | 2,189 <sup>§2-11</sup> §      | 7,316 <sup>±7-67</sup> ‡      | 5,069 <sup>±5-29</sup> ‡§      | 3,852 <sup>±0-40</sup> ‡§      |
| <b>Adversity</b>                                 | <b>4,582<sup>±4-37</sup></b> | <b>4,108<sup>±4-26</sup>‡</b>  | <b>1,240<sup>±1-31</sup></b> | <b>2,124<sup>§2-04</sup>§</b> | <b>1,329<sup>§1-27</sup>§</b> | <b>669<sup>±0-72</sup>‡</b>   | <b>1,458<sup>±1-53</sup>‡§</b> | <b>1,748<sup>±1-74</sup>‡§</b> |
| Any <u>Victimisation</u> <u>violence</u>         | 391 <sup>0-76</sup>          | 1,970 <sup>±2-20</sup> ‡       | 103 <sup>0-25</sup>          | 152 <sup>§0-31</sup> §        | 110 <sup>0-19</sup>           | 277 <sup>±0-33</sup> ‡        | 731 <sup>±0-80</sup> ‡§        | 833 <sup>±0-90</sup> ‡§        |
| Any <u>Self-harm</u>                             | 3,418 <sup>3-26</sup>        | 1,266 <sup>±1-33</sup> ‡       | 777 <sup>0-90</sup>          | 1,463 <sup>§1-58</sup> §      | 923 <sup>§0-97</sup> §        | 170 <sup>±0-22</sup> ‡        | 393 <sup>±0-47</sup> ‡§        | 478 <sup>±0-55</sup> ‡§        |
| Any <u>Drug or Alcohol</u> <u>Misuse</u>         | 4,194 <sup>3-98</sup>        | 2,463 <sup>±2-47</sup> ‡       | 1,112 <sup>±1-16</sup>       | 1,959 <sup>§1-87</sup> §      | 1,221 <sup>§1-15</sup> §      | 375 <sup>±0-39</sup> ‡        | 807 <sup>±0-84</sup> ‡§        | 1,077 <sup>±1-01</sup> ‡§      |
| <b>Single adversity</b>                          | <b>1,254<sup>±1-15</sup></b> | <b>2616<sup>±2-72</sup>‡</b>   | <b>495<sup>0-44</sup></b>    | <b>687<sup>§0-49</sup>§</b>   | <b>412<sup>§0-32</sup>§</b>   | <b>516<sup>0-53</sup>‡</b>    | <b>991<sup>±0-99</sup>‡§</b>   | <b>1,114<sup>±1-08</sup>‡§</b> |
| <u>Victimisation-Violence</u> <u>Only</u>        | 235 <sup>0-24</sup>          | 1,496 <sup>±1-63</sup> ‡       | 77 <sup>0-09</sup>           | 99 <sup>§0-10</sup> §         | 75 <sup>0-08</sup>            | 256 <sup>±0-28</sup> ‡        | 609 <sup>±0-64</sup> ‡§        | 635 <sup>±0-69</sup> ‡§        |
| <u>Self-harm</u> <u>Only</u>                     | 144 <sup>0-13</sup>          | 136 <sup>0-14</sup>            | 48 <sup>0-05</sup>           | 63 <sup>§0-06</sup> §         | 31 <sup>§0-03</sup> §         | 37 <sup>±0-05</sup> ‡         | 39 <sup>0-04</sup> ‡§          | 34 <sup>0-04</sup> ‡           |
| <u>Drug or Alcohol</u> <u>Misuse</u> <u>Only</u> | 874 <sup>0-78</sup>          | 984 <sup>±0-95</sup> ‡         | 369 <sup>0-29</sup>          | 525 <sup>§0-33</sup> §        | 305 <sup>§0-21</sup> §        | 224 <sup>±0-21</sup> ‡        | 342 <sup>±0-31</sup> ‡§        | 445 <sup>±0-35</sup> ‡§        |
| <b>Multiple adversity</b>                        | <b>3,328<sup>±3-22</sup></b> | <b>1,492<sup>±1-54</sup>‡</b>  | <b>745<sup>0-88</sup></b>    | <b>1,436<sup>§1-55</sup>§</b> | <b>917<sup>§0-95</sup>§</b>   | <b>153<sup>±0-19</sup>‡</b>   | <b>467<sup>±0-54</sup>‡§</b>   | <b>634<sup>±0-66</sup>‡§</b>   |
| V+SH                                             | 8 <sup>0-02</sup>            | 13 <sup>±0-02</sup> ‡          | 3 <sup>0-01</sup>            | 3 <sup>0-01</sup>             | 1 <sup>§0-004</sup> §         | 1 <sup>±0-005</sup> ‡         | 2 <sup>0-01</sup> ‡§           | 2 <sup>0-01</sup> ‡            |
| V+DA                                             | 54 <sup>0-08</sup>           | 361 <sup>±0-35</sup> ‡         | 17 <sup>0-03</sup>           | 37 <sup>§0-03</sup> §         | 26 <sup>§0-02</sup> §         | 19 <sup>0-02</sup> ‡          | 114 <sup>±0-11</sup> ‡§        | 190 <sup>±0-15</sup> ‡§        |
| SH+DA                                            | 3,172 <sup>2-70</sup>        | 1,018 <sup>±0-97</sup> ‡       | 72 <sup>00-72</sup>          | 1,384 <sup>§1-34</sup> §      | 882 <sup>§0-84</sup> §        | 131 <sup>±0-14</sup> ‡        | 345 <sup>±0-37</sup> ‡§        | 436 <sup>±0-45</sup> ‡§        |
| V+SH+DA                                          | 93 <sup>0-42</sup>           | 100 <sup>±0-20</sup> ‡         | 6 <sup>0-12</sup>            | 13 <sup>§0-17</sup> §         | 8 <sup>0-09</sup>             | 2 <sup>±0-02</sup> ‡          | 5 <sup>±0-05</sup> ‡§          | 6 <sup>§0-06</sup> ‡§          |
| No adversity                                     | 4,491 <sup>4-29</sup>        | 11,417 <sup>±12-04</sup> ‡     | 2,676 <sup>2-79</sup>        | 1,136 <sup>§1-08</sup> §      | 860 <sup>§0-84</sup> §        | 6,648 <sup>±6-95</sup> ‡      | 3,611 <sup>±3-76</sup> ‡§      | 2,171 <sup>±2-26</sup> ‡§      |
| <b>Accidents</b> <u>Only</u>                     | <b>748<sup>0-74</sup></b>    | <b>10,466<sup>±1-00</sup>‡</b> | <b>2,221<sup>0-32</sup></b>  | <b>804<sup>§0-26</sup>§</b>   | <b>580<sup>§0-24</sup>§</b>   | <b>5,887<sup>±0-47</sup>‡</b> | <b>3,109<sup>±0-36</sup>‡§</b> | <b>1,784<sup>±0-31</sup>‡§</b> |
| <b>Other</b> <u>Causes</u>                       | <b>3,742<sup>3-58</sup></b>  | <b>951<sup>±11-04</sup>‡</b>   | <b>455<sup>2-47</sup></b>    | <b>332<sup>§0-82</sup>§</b>   | <b>279<sup>§0-60</sup>§</b>   | <b>761<sup>±6-48</sup>‡</b>   | <b>503<sup>±3-40</sup>‡§</b>   | <b>388<sup>±1-95</sup>‡§</b>   |

1  
2  
3  
4  
5  
6  
7  
8  
9 | V = ~~Victimisation~~Violence, SH = Self-harm, DA = Drug or Alcohol Misuse, ~~AdvRI = Adversity related Injury, AccRI Only = Accident~~  
10 | ~~related Injury Only~~

11 \*Due to large denominators, confidence intervals for population prevalence were too narrow to provide any meaningful  
12 interpretation and so are not shown.

13 | †\*\* Each adolescent classified by all adversity/accidents seen at any emergency injury admission(s) at 10-19 years, 10-14 years,  
14 15-17 years and 18-19 years, respectively.

15 ‡Statistically significantly different from girls of the same age (according to 95% confidence intervals).

16 §Statistically significantly different from 10-14 year olds of the same sex (according to 95% confidence intervals).  
17  
18  
19  
20  
21  
22  
23  
24  
25  
26  
27  
28  
29  
30  
31  
32  
33  
34  
35  
36  
37  
38  
39  
40  
41  
42  
43  
44  
45  
46  
47  
48  
49

1  
2  
3  
4  
5  
6  
7  
8  
9  
10  
11  
12  
13  
14  
15  
16  
17  
18  
19  
20  
21  
22  
23  
24  
25  
26  
27  
28  
29  
30  
31  
32  
33  
34  
35  
36  
37  
38  
39  
40  
41  
42  
43  
44  
45  
46  
47  
48  
49

**REFERENCES**

1. Inpatient HES Data Dictionary. Leeds: Health and Social Care Information Centre, 2010.  
2. Hardelid P DN, Davey J, Primbramska I, Gilbert R. Overview of child deaths in the four UK countries. London: 2013.

For peer review only

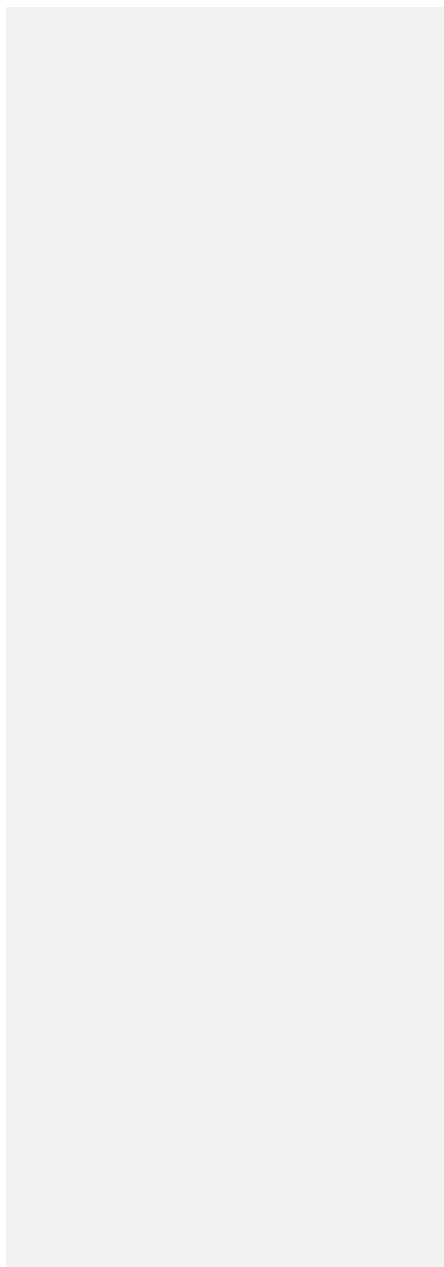

## STROBE Statement—checklist of items that should be included in reports of observational studies

|                              | Item No | Recommendation                                                                                                                                                                                                                                                                                                                                                                                                                                                                                                                                                                                                                                                                                        |
|------------------------------|---------|-------------------------------------------------------------------------------------------------------------------------------------------------------------------------------------------------------------------------------------------------------------------------------------------------------------------------------------------------------------------------------------------------------------------------------------------------------------------------------------------------------------------------------------------------------------------------------------------------------------------------------------------------------------------------------------------------------|
| <b>Title and abstract</b>    | 1       | (a) Indicate the study's design with a commonly used term in the title or the abstract<br>(b) Provide in the abstract an informative and balanced summary of what was done and what was found                                                                                                                                                                                                                                                                                                                                                                                                                                                                                                         |
| <b>Introduction</b>          |         |                                                                                                                                                                                                                                                                                                                                                                                                                                                                                                                                                                                                                                                                                                       |
| Background/rationale         | 2       | Explain the scientific background and rationale for the investigation being reported                                                                                                                                                                                                                                                                                                                                                                                                                                                                                                                                                                                                                  |
| Objectives                   | 3       | State specific objectives, including any prespecified hypotheses                                                                                                                                                                                                                                                                                                                                                                                                                                                                                                                                                                                                                                      |
| <b>Methods</b>               |         |                                                                                                                                                                                                                                                                                                                                                                                                                                                                                                                                                                                                                                                                                                       |
| Study design                 | 4       | Present key elements of study design early in the paper                                                                                                                                                                                                                                                                                                                                                                                                                                                                                                                                                                                                                                               |
| Setting                      | 5       | Describe the setting, locations, and relevant dates, including periods of recruitment, exposure, follow-up, and data collection                                                                                                                                                                                                                                                                                                                                                                                                                                                                                                                                                                       |
| Participants                 | 6       | (a) <i>Cohort study</i> —Give the eligibility criteria, and the sources and methods of selection of participants. Describe methods of follow-up<br><i>Case-control study</i> —Give the eligibility criteria, and the sources and methods of case ascertainment and control selection. Give the rationale for the choice of cases and controls<br><i>Cross-sectional study</i> —Give the eligibility criteria, and the sources and methods of selection of participants<br>(b) <i>Cohort study</i> —For matched studies, give matching criteria and number of exposed and unexposed. N/A<br><i>Case-control study</i> —For matched studies, give matching criteria and the number of controls per case |
| Variables                    | 7       | Clearly define all outcomes, exposures, predictors, potential confounders, and effect modifiers. Give diagnostic criteria, if applicable                                                                                                                                                                                                                                                                                                                                                                                                                                                                                                                                                              |
| Data sources/<br>measurement | 8*      | For each variable of interest, give sources of data and details of methods of assessment (measurement). Describe comparability of assessment methods if there is more than one group                                                                                                                                                                                                                                                                                                                                                                                                                                                                                                                  |
| Bias                         | 9       | Describe any efforts to address potential sources of bias. We only analysed those who could be observed between ages 10 and 19, so no bias due to different lengths of admission trajectories.                                                                                                                                                                                                                                                                                                                                                                                                                                                                                                        |
| Study size                   | 10      | Explain how the study size was arrived at. All available administrative data.                                                                                                                                                                                                                                                                                                                                                                                                                                                                                                                                                                                                                         |
| Quantitative variables       | 11      | Explain how quantitative variables were handled in the analyses. If applicable, describe which groupings were chosen and why                                                                                                                                                                                                                                                                                                                                                                                                                                                                                                                                                                          |
| Statistical methods          | 12      | (a) Describe all statistical methods, including those used to control for confounding<br>(b) Describe any methods used to examine subgroups and interactions<br>(c) Explain how missing data were addressed. N/A<br>(d) <i>Cohort study</i> —If applicable, explain how loss to follow-up was addressed. We only analysed those who could be observed between ages 10 and 19.<br><i>Case-control study</i> —If applicable, explain how matching of cases and controls was addressed<br><i>Cross-sectional study</i> —If applicable, describe analytical methods taking account of sampling strategy<br>(e) Describe any sensitivity analyses. N/A                                                     |

Continued on next page



**Results**

|                  |     |                                                                                                                                                                                                                                                                                                                                                                                                                                                                                                                         |
|------------------|-----|-------------------------------------------------------------------------------------------------------------------------------------------------------------------------------------------------------------------------------------------------------------------------------------------------------------------------------------------------------------------------------------------------------------------------------------------------------------------------------------------------------------------------|
| Participants     | 13* | (a) Report numbers of individuals at each stage of study—eg numbers potentially eligible, examined for eligibility, confirmed eligible, included in the study, completing follow-up, and analysed<br>(b) Give reasons for non-participation at each stage. <i>N/A</i><br>(c) Consider use of a flow diagram. <i>We didn't use a flow diagram as eligibility could be described using one sentence.</i>                                                                                                                  |
| Descriptive data | 14* | (a) Give characteristics of study participants (eg demographic, clinical, social) and information on exposures and potential confounders<br>(b) Indicate number of participants with missing data for each variable of interest<br>(c) <i>Cohort study</i> —Summarise follow-up time (eg, average and total amount). <i>N/A</i>                                                                                                                                                                                         |
| Outcome data     | 15* | <i>Cohort study</i> —Report numbers of outcome events or summary measures over time. <i>We state how many emergency admissions for adversity-related injury the adversity group had. We also provide a table indicating the number of emergency admissions for injury and admissions (of any type) during ages 10-19.</i><br><i>Case-control study</i> —Report numbers in each exposure category, or summary measures of exposure<br><i>Cross-sectional study</i> —Report numbers of outcome events or summary measures |
| Main results     | 16  | (a) Give unadjusted estimates and, if applicable, confounder-adjusted estimates and their precision (eg, 95% confidence interval). Make clear which confounders were adjusted for and why they were included. <i>We gave prevalence estimates stratified by age-group and sex.</i><br>(b) Report category boundaries when continuous variables were categorized<br>(c) If relevant, consider translating estimates of relative risk into absolute risk for a meaningful time period. <i>N/A</i>                         |
| Other analyses   | 17  | Report other analyses done—eg analyses of subgroups and interactions, and sensitivity analyses                                                                                                                                                                                                                                                                                                                                                                                                                          |

**Discussion**

|                  |    |                                                                                                                                                                            |
|------------------|----|----------------------------------------------------------------------------------------------------------------------------------------------------------------------------|
| Key results      | 18 | Summarise key results with reference to study objectives                                                                                                                   |
| Limitations      | 19 | Discuss limitations of the study, taking into account sources of potential bias or imprecision. Discuss both direction and magnitude of any potential bias                 |
| Interpretation   | 20 | Give a cautious overall interpretation of results considering objectives, limitations, multiplicity of analyses, results from similar studies, and other relevant evidence |
| Generalisability | 21 | Discuss the generalisability (external validity) of the study results                                                                                                      |

**Other information**

|         |    |                                                                                                                                                               |
|---------|----|---------------------------------------------------------------------------------------------------------------------------------------------------------------|
| Funding | 22 | Give the source of funding and the role of the funders for the present study and, if applicable, for the original study on which the present article is based |
|---------|----|---------------------------------------------------------------------------------------------------------------------------------------------------------------|

\*Give information separately for cases and controls in case-control studies and, if applicable, for exposed and unexposed groups in cohort and cross-sectional studies.

**Note:** An Explanation and Elaboration article discusses each checklist item and gives methodological background and published examples of transparent reporting. The STROBE checklist is best used in conjunction with this article (freely available on the Web sites of PLoS Medicine at <http://www.plosmedicine.org/>, Annals of Internal Medicine at <http://www.annals.org/>, and Epidemiology at <http://www.epidem.com/>). Information on the STROBE Initiative is available at [www.strobe-statement.org](http://www.strobe-statement.org).

# BMJ Open

## Violence, self-harm and drug or alcohol misuse in adolescents admitted to hospitals in England for injury: a retrospective cohort study

|                                 |                                                                                                                                                                                                                                                                                                                                                                                  |
|---------------------------------|----------------------------------------------------------------------------------------------------------------------------------------------------------------------------------------------------------------------------------------------------------------------------------------------------------------------------------------------------------------------------------|
| Journal:                        | <i>BMJ Open</i>                                                                                                                                                                                                                                                                                                                                                                  |
| Manuscript ID:                  | bmjopen-2014-006079.R2                                                                                                                                                                                                                                                                                                                                                           |
| Article Type:                   | Research                                                                                                                                                                                                                                                                                                                                                                         |
| Date Submitted by the Author:   | 22-Jan-2015                                                                                                                                                                                                                                                                                                                                                                      |
| Complete List of Authors:       | Herbert, Anne; UCL Institute of Child Health, Population, Policy and Practice Programme<br>Gilbert, Ruth; UCL Institute of Child Health, Population, Policy and Practice Programme<br>Gonzalez-Izquierdo, Arturo; UCL Institute of Child Health, Population, Policy and Practice Programme<br>Li, Leah; UCL Institute of Child Health, Population, Policy and Practice Programme |
| <b>Primary Subject Heading</b>: | Paediatrics                                                                                                                                                                                                                                                                                                                                                                      |
| Secondary Subject Heading:      | Mental health, Health services research                                                                                                                                                                                                                                                                                                                                          |
| Keywords:                       | MENTAL HEALTH, Non-accidental injury < PAEDIATRICS, Substance misuse < PSYCHIATRY, Suicide & self-harm < PSYCHIATRY                                                                                                                                                                                                                                                              |
|                                 |                                                                                                                                                                                                                                                                                                                                                                                  |

SCHOLARONE™  
Manuscripts

Only

1  
2  
3  
4  
5 **1 Violence, self-harm and drug or alcohol misuse in**  
6  
7 **2 adolescents admitted to hospitals in England for injury: a**  
8  
9 **3 retrospective cohort study**  
10  
11  
12  
13  
14

15 Annie Herbert, Centre for Paediatric Epidemiology & Biostatistics, University  
16 College London Institute of Child Health, 30 Guilford Street, London, WC1N  
17 1EH, Tel: +44207 905 2790, Fax: +44207 905 2793,  
18  
19 [annie.herbert.12@ucl.ac.uk](mailto:annie.herbert.12@ucl.ac.uk)  
20  
21  
22  
23

24  
25  
26 *Annie Herbert, M.Sc.<sup>1</sup>, Ruth Gilbert, M.D.<sup>1</sup>, Arturo González-*  
27 *Izquierdo, Ph.D.<sup>1</sup>, Leah Li, Ph.D.<sup>1</sup>*  
28  
29  
30

31  
32  
33 1. Centre for Paediatric Epidemiology & Biostatistics, University College  
34 London Institute of Child Health, 30 Guilford Street, London, WC1N 1EH, UK  
35

36  
37 Short title: Adversity in adolescents admitted to hospital for injury  
38

39 *Key words: Wounds and Injuries, Violence, Self-injurious Behaviour,*  
40 *Substance-related Disorders, Adolescent*  
41  
42  
43

44  
45  
46 Word count: 2,604  
47

48 No. figures: 2  
49

50 No tables: 2  
51

52 No references: 35  
53

54 No supplementary files for online only publication: 5  
55  
56  
57  
58  
59  
60

1  
2  
3  
4 24 **ABSTRACT**

5  
6 25 **Objectives**

7  
8 26 Of adolescents in the general population in England, we aimed to determine  
9  
10 27 1) the proportion that has an emergency admission to hospital for injury  
11  
12 28 related to adversity (violence, self-harm or drug or alcohol misuse) and 2) the  
13  
14 29 risk of recurrent emergency admissions for injury in adolescents admitted with  
15  
16 30 adversity-related injury compared with those admitted with accident-related  
17  
18 31 injury only.

19  
20  
21 32 **Design**

22  
23 33 We used longitudinally-linked administrative hospital data (Hospital Episode  
24  
25 34 Statistics) to identify 10-19 year olds with emergency admissions for injury  
26  
27 35 (including day cases lasting more than four hours), in England in 1998-2011.  
28  
29 36 We used Office for National Statistics mid-year estimates for population  
30  
31 37 denominators.

32  
33 38 **Results**

34  
35 39 Approximately 4.3% (n=141 248) of adolescents in the general population  
36  
37 40 (n=3 254 046) had one or more emergency admissions for adversity-related  
38  
39 41 injury (girls 4.6%, boys 4.1%), accounting for 50.0% of all emergency  
40  
41 42 admissions for injury in girls and 29.1% in boys. Admissions for self-harm or  
42  
43 43 drug or alcohol misuse commonly occurred in the same girls and boys.  
44  
45 44 Recurrent emergency admissions for injury were more common in  
46  
47 45 adolescents with adversity-related injury (girls 17.3%; boys 16.5%) than in  
48  
49 46 those with accident-related injury only (girls 4.7%; boys 7.4%), particularly for  
50  
51 47 adolescents with adversity-related injury related to multiple types of adversity  
52  
53 48 (girls 21.1%; boys 24.2%).  
54  
55  
56  
57  
58  
59  
60

1  
2  
3  
4  
5  
6  
7  
8  
9  
10  
11  
12  
13  
14  
15  
16  
17  
18  
19  
20  
21  
22  
23  
24  
25  
26  
27  
28  
29  
30  
31  
32  
33  
34  
35  
36  
37  
38  
39  
40  
41  
42  
43  
44  
45  
46  
47  
48  
49  
50  
51  
52  
53  
54  
55  
56  
57  
58  
59  
60

49 **Conclusion**

50 Hospital-based interventions should be developed to reduce the risk of future  
51 injury in adolescents admitted for adversity-related injury.

For peer review only

1  
2  
3 52 **What is already known on this subject**  
4

- 5 53 • Adolescents exposed to adversity (violence, self-harm or drug or  
6 alcohol misuse) often use health services, and repetitively.  
7 54  
8  
9 55 • Many adolescents in the general population are exposed to multiple  
10 types of adversity during their adolescence.  
11 56  
12  
13  
14  
15  
16

17 58 **What this study adds**

- 18  
19 59 • One in 20 adolescents in England has an emergency admission to  
20 hospital for adversity-related injury between 10 and 19 years old.  
21 60  
22  
23 61 • Many adolescents admitted with adversity-related injury (particularly  
24 girls) are admitted with multiple types of adversity, self-harm and drug  
25 or alcohol misuse being the most common combination.  
26 62  
27  
28 63  
29  
30 64 • Re-admission is more common in these adolescents than those  
31 admitted with accident-related injury only.  
32 65  
33  
34  
35  
36

37 67 **Strengths and limitations of this study**

- 38  
39 68 • Hospital Episodes Statistics (HES) captured data on all admissions to  
40 National Health Service hospitals in England at 10-19 years old in this  
41 study's cohort.  
42 69  
43  
44 70  
45  
46 71 • The longitudinal link between admissions for each individual in HES  
47 data allowed us to study the burden of multiple emergency admissions  
48 for injury over time.  
49 72  
50  
51 73  
52  
53 74 • However, violence, self-harm and drug or alcohol misuse are not  
54 always recognised at an admission, or consistently recorded, and  
55 75  
56  
57  
58  
59  
60

1  
2  
3  
4  
5  
6  
7  
8  
9  
10  
11  
12  
13  
14  
15  
16  
17  
18  
19  
20  
21  
22  
23  
24  
25  
26  
27  
28  
29  
30  
31  
32  
33  
34  
35  
36  
37  
38  
39  
40  
41  
42  
43  
44  
45  
46  
47  
48  
49  
50  
51  
52  
53  
54  
55  
56  
57  
58  
59  
60

76            therefore this study’s estimates of prevalence of adversity are likely to  
77            be underestimates.

For peer review only

1  
2  
3 **78 INTRODUCTION**  
4

5 79 Many adolescents exposed to adversity such as violence, self-harm, or drug  
6  
7 80 or alcohol misuse use secondary health services,[1 2] often repetitively.[3 4]  
8  
9 81 For example, in a self-report survey of 15-16 year olds in England, 12.6% of  
10  
11 82 those who had self-harmed had presented to hospital.[2] It is also estimated  
12  
13 83 that approximately one-third of patients attending a hospital in England for  
14  
15 84 self-harm re-attend for self-harm in the following year.[4] Improved  
16  
17 85 management of adolescents exposed to adversity could reduce risk of  
18  
19 86 repetition as well as the burden on secondary care.[5-7]  
20  
21

22  
23 87 An admission to hospital provides the 'teachable moment'. [8] That is,  
24  
25 88 both adolescents and their families may be more likely to engage with an  
26  
27 89 intervention than if they had received it elsewhere. Hospital-based  
28  
29 90 interventions to reduce the risk of future harm could benefit these adolescents  
30  
31 91 by reducing episodes of injury, and may reduce recurrent emergency (i.e.,  
32  
33 92 acute or unplanned) admissions for injury.  
34  
35

36 93 To date, there is a lack of evidence on how different types of adversity-  
37  
38 94 related injury occur in the same adolescents over time. In addition, policy  
39  
40 95 makers and service providers need to know how many adolescents have an  
41  
42 96 emergency admission to hospital for adversity-related injury, their  
43  
44 97 characteristics and their specific rates of re-admission if they are to be  
45  
46 98 feasibly targeted for intervention.  
47  
48

49 99 In this study we used administrative hospital data and Office for  
50  
51 100 National Statistics (ONS) mid-year population estimates to estimate the  
52  
53 101 number of adolescents in the general population who have ever had an  
54  
55 102 emergency admission to hospital for injury. We then estimated the  
56  
57  
58  
59  
60



1  
2  
3 103 prevalence of emergency admissions for injury related to violence, self-harm  
4  
5 104 and drug or alcohol misuse (alone and co-occurring) in the general  
6  
7 105 population. Finally, we determined the risk of recurrent emergency  
8  
9  
10 106 admissions for injury in adolescents who had at least one admission between  
11  
12 107 10 and 19 years for adversity-related injury compared with adolescents only  
13  
14 108 ever admitted for accidental injury during the same period.  
15  
16  
17  
18  
19  
20  
21  
22  
23  
24  
25  
26  
27  
28  
29  
30  
31  
32  
33  
34  
35  
36  
37  
38  
39  
40  
41  
42  
43  
44  
45  
46  
47  
48  
49  
50  
51  
52  
53  
54  
55  
56  
57  
58  
59  
60

For peer review only

1  
2  
3  
4  
5 109 **METHODS**  
6  
7

8 110 **Study population**  
9

10 111 Using administrative data from all admissions to National Health Service  
11 hospitals in England (Hospital Episode Statistics [HES]) in 1998-2011,[9] we  
12 derived a retrospective cohort of adolescents who turned 10 years old in  
13 1998-2002, who could be observed throughout adolescence until 19 years old  
14 (Supplementary Table 1).[10] Each individual also had to have at least one  
15 emergency admission for injury between 10 and 19 years old.  
16  
17  
18  
19  
20  
21  
22  
23

24 117 **Admission data**  
25

26 118 The Health and Social Care Information Centre provided pseudonymised data  
27 on hospital admissions, use of which did not require Research Ethics  
28 Committee approval.[11] An admission is defined by the National Health  
29 Service as any hospital case lasting longer than four hours, and so includes  
30 long day cases as well as overnight stays. We analysed any hospital  
31 transfers or admissions within one day after discharge as the same  
32 admission, as previously described.[12] We used the variable for method of  
33 admission ('admimeth') to define an emergency admission. We used all  
34 International Classification of Diseases-10 (ICD-10) diagnosis codes recorded  
35 during an admission to categorise admissions as being for injury related to  
36 adversity or an accident (Supplementary Table 2).[13]  
37  
38  
39  
40  
41  
42  
43  
44  
45  
46  
47  
48  
49  
50

51 129 **Types of injury and age at emergency admission**  
52

53 130 We defined an emergency admission for injury as being related to adversity,  
54 comprising violence (maltreatment/assault/undetermined causes of injury),  
55  
56  
57  
58  
59  
60

1  
2  
3 132 self-harm or drug or alcohol misuse, using mutually exclusive clusters of ICD-  
4  
5 133 10 codes (Supplementary Table 2). Violence was defined by previously-  
6  
7 134 validated codes, which would trigger consideration of violence by carers,  
8  
9 135 peers or strangers.[12 14 15] We defined self-harm using codes that  
10  
11 136 mentioned either 'self-harm' or 'self-poisoning'. Drug or alcohol misuse was  
12  
13 137 defined by codes that mentioned 'alcohol', 'drugs', 'noxious substance' or  
14  
15 138 'solvent'. We defined an injury as being related to accidents only if no  
16  
17 139 adversity codes were present but there were codes from the ICD-10  
18  
19 140 *Accidents* subchapter (V01-X59).[13]

20  
21  
22  
23 141 We grouped age at each admission to reflect age of onset of puberty  
24  
25 142 (10-14 years), age of sitting secondary school exams (15-17 years) and the  
26  
27 143 legal age for buying alcohol (18-19 years).[16-19]

28  
29  
30 144 **Classification of adolescents according to types of injury and age at**  
31  
32 145 **emergency admissions**

33  
34  
35 146 We classed adolescents into groups according to all of their emergency  
36  
37 147 admissions for injury between 10 and 19 years old. Adolescents were  
38  
39 148 classed as belonging to the 'adversity' group (any adversity-related injury  
40  
41 149 between 10 and 19 years old), 'accidents only' group (no adversity-related  
42  
43 150 injury but one or more accident-related injuries) or 'other causes' group (no  
44  
45 151 adversity-related or accident-related injuries) (Supplementary Figure 1).  
46  
47 152 Among adolescents in the adversity group, we determined the proportion  
48  
49 153 exposed to violence-, self-harm- and drug or alcohol misuse-related injury at  
50  
51 154 age 10-19, respectively. We further classified the adversity group into seven  
52  
53 155 mutually exclusive sub-groups: violence only, self-harm only, drug or alcohol  
54  
55 156 misuse only, violence and self-harm, violence and drug or alcohol misuse,  
56  
57  
58  
59  
60

1  
2  
3 157 self-harm and drug or alcohol misuse, and violence, self-harm and drug or  
4  
5 158 alcohol misuse.

6  
7 159 We also grouped adolescents as above, according to their emergency  
8  
9  
10 160 admissions for injury at 10-14 years only, 15-17 years only and 18-19 years  
11  
12 161 only (Supplementary Figure 2).

### 162 **Population denominators**

163 We used ONS mid-year population estimates to derive population  
164 denominators.[20 21] These data are freely available online broken down by  
165 sex and year of age.

### 166 **Analyses**

167 We estimated the proportion of adolescents in the general population who had  
168 an emergency admission for injury between 10 and 19 years old. We used  
169 the number of adolescents in our derived retrospective cohort as the  
170 numerator and ONS mid-year estimates for 10 year olds in 1998-2002 as the  
171 population denominator. We then calculated these proportions by types of  
172 injury at 10-19 years old (adversity-related [adversity group and seven  
173 mutually exclusive subgroups] and accidents only [accidents only group]) and  
174 by age group, as described above.

175 We calculated the proportion of adolescents in the adversity group (and  
176 subgroups) and in the accidents only group who had an emergency admission  
177 for injury twice and three or more times between 10 and 19 years old. We  
178 also calculated the proportions of adolescents with two or three or more  
179 admissions of any type (including non-emergency and non-injury).

180 We reported all results separately for girls and boys since differences  
181 between girls and boys have been reported for prevalence of adversity in the

1  
2  
3 182 general population.[1 22-24] We calculated 95% confidence intervals for all  
4  
5 183 proportions but did not present them here as they were all too narrow to  
6  
7 184 convey any useful information (within one unit of the sample estimate).  
8  
9  
10 185 Analyses were carried out in StataSE 12.  
11  
12  
13  
14  
15  
16  
17  
18  
19  
20  
21  
22  
23  
24  
25  
26  
27  
28  
29  
30  
31  
32  
33  
34  
35  
36  
37  
38  
39  
40  
41  
42  
43  
44  
45  
46  
47  
48  
49  
50  
51  
52  
53  
54  
55  
56  
57  
58  
59  
60

For peer review only

1  
2  
3  
4  
5 186 **RESULTS**  
6

7 187 There were 1 033 702 adolescents in HES admissions data in 1998-2011, of  
8  
9 188 which 402 916 formed the study cohort (462 476 emergency admission for  
10  
11 189 injury when considering multiple presentations from the same adolescent, 802  
12  
13 190 682 admissions of any type [including non-emergency and non-injury, 662  
14  
15 191 727 of which were overnight stays]) (Table 1), representing 12.4% (402 916/3  
16  
17 192 254 046) of the adolescent population. Twice as many boys as girls had an  
18  
19 193 emergency admission for injury during adolescence (144 158/1 588 942 girls  
20  
21 194 in the population [8.7%]; 258 503/1 665 104 boys [16.3%]).  
22  
23  
24  
25  
26  
27  
28  
29  
30  
31  
32  
33  
34  
35  
36  
37  
38  
39  
40  
41  
42  
43  
44  
45  
46  
47  
48  
49  
50  
51  
52  
53  
54  
55  
56  
57  
58  
59  
60

195 **Table 1.** Characteristics of adolescents whose entire ten years of adolescence (ages 10-19) occurred in 1998-2011.

196

| Characteristics | Adolescent population* | Adolescents with emergency admission(s) for injury between 10 and 19 years old, n (row %) |                       |                       |                     |
|-----------------|------------------------|-------------------------------------------------------------------------------------------|-----------------------|-----------------------|---------------------|
|                 | Total                  | Total                                                                                     | Adversity             | Accidents only        | Other causes        |
| <b>All</b>      | <b>3,254,046</b>       | <b>402,916 (100.0)</b>                                                                    | <b>141,248 (35.1)</b> | <b>233,907 (58.1)</b> | <b>27,761 (6.9)</b> |
| <b>Age**</b>    |                        |                                                                                           |                       |                       |                     |
| <b>Girls</b>    | <b>1,588,942</b>       | <b>144,158 (100.0)</b>                                                                    | <b>72,805 (50.5)</b>  | <b>59,528 (41.3)</b>  | <b>11,888 (8.2)</b> |
| 10-14 years     | .                      | 65,208 (100.0)                                                                            | 23,178 (35.5)         | 37,388 (57.3)         | 4,642 (7.1)         |
| 15-17 years     | .                      | 48,286 (100.0)                                                                            | 31,573 (65.4)         | 12,922 (26.8)         | 3,791 (7.9)         |
| 18-19 years     | .                      | 30,664 (100.0)                                                                            | 18,054 (58.9)         | 9,155 (29.9)          | 3,455 (11.3)        |
| <b>Boys</b>     | <b>1,665,104</b>       | <b>258,503 (100.0)</b>                                                                    | <b>68,403 (26.5)</b>  | <b>174,267 (67.4)</b> | <b>15,833 (6.1)</b> |
| 10-14 years     | .                      | 121,821 (100.0)                                                                           | 17,667 (14.5)         | 97,478 (80.0)         | 6,676 (5.5)         |
| 15-17 years     | .                      | 79,223 (100.0)                                                                            | 25,014 (31.6)         | 49,345 (62.3)         | 4,864 (6.1)         |
| 18-19 years     | .                      | 57,459 (100.0)                                                                            | 25,722 (44.8)         | 27,444 (47.8)         | 4,293 (7.5)         |
| Missing (Sex)   | .                      | 255 (100.0)                                                                               | 40 (15.7)             | 175 (68.6)            | 40 (15.7)           |

197 \*Based on ONS mid-year England statistics for 10 year olds in 1998-2002.[20]

198 \*\*At first emergency admission for injury

### 199 **Types of injury and age at emergency admission**

200 One-third of the cohort (141 248, 4.3% of the population) had a record of an  
201 emergency admission for adversity-related injury between 10 and 19 years  
202 old (the adversity group; 157 004 emergency admissions for adversity-related  
203 injury in total) (Table 1), with similar rates between sexes (72 805, 4.6% girls  
204 in the population; 68 403, 4.1% boys).

205 The remaining two-thirds of the cohort (261 668, 8.1% of the  
206 adolescent population) had emergency admissions for injury which were  
207 never related to adversity (Table 1). Among these adolescents, 233 907  
208 (89.4%) had an accident-related injury (the accidents only group, 7.2% of the  
209 population) and 27 761 (10.6%) had no accident-related injury (other causes  
210 group, 0.9% of the population). A high proportion of the other causes group  
211 were affected by a chronic condition<sup>1</sup> between 10 and 19 years old (11 221/27  
212 761, 40.4%), compared with the adversity group (45 321/141 248, 32.1%) or  
213 accidents only group (49 434/233 907, 21.1%).

214 Proportions of adolescents in the general population and within  
215 individual age groups by adversity [and subgroups], accidents only, and other  
216 causes groups are provided in Supplementary Table 3.

### 217 **Types of adversity-related injury**

218 Among adolescents in the adversity group (girls 72 805, boys 68 403) (Figure  
219 1), the most common type of adversity was drug or alcohol misuse (girls  
220 91.5%, boys 60.0%). A higher proportion of boys than girls were exposed to

---

<sup>1</sup> Defined by ICD-10 codes (Supplementary Table 2)



1  
2  
3 221 violence (girls 8.5%, boys 47.6%), but a higher proportion of girls than boys  
4  
5 222 were exposed to self-harm (girls 74.6%; boys 32.9%).  
6

7 223 Girls in the adversity group were most likely to be exposed to multiple  
8  
9 224 types of adversity between 10 and 19 years old (69.2% + 2.0% + 1.2% + 0.2%  
10  
11 225 = 72.6%) (Figure 1), especially self-harm and drug or alcohol misuse (69.2%  
12  
13 226 of the entire adversity group, i.e., most of the 72.6%). Fewer boys in the  
14  
15 227 adversity group were exposed to multiple types of adversity (38.4%), the most  
16  
17 228 common combination also being self-harm and drug or alcohol misuse  
18  
19 229 (24.8%).  
20  
21  
22

23 230 For most of the adolescents who were exposed to multiple types of  
24  
25 231 adversity, the combination of types was recorded at the same admission. For  
26  
27 232 example, among the 130 adolescent girls who were exposed to violence and  
28  
29 233 self-harm between 10 and 19 years old (Table 2), 64.6% had both violence  
30  
31 234 and self-harm codes present simultaneously in at least one emergency  
32  
33 235 admission for injury (violence and drug or alcohol misuse 78.8%, self-harm  
34  
35 236 and drug or alcohol misuse 99.7%, violence, self-harm and drug or alcohol  
36  
37 237 misuse 33.9%; boys: violence and self-harm 40.1%, violence and drug or  
38  
39 238 alcohol misuse 84.1%, self-harm and drug or alcohol misuse 99.1%, violence,  
40  
41 239 self-harm and drug or alcohol misuse 20.0%) (data not shown).  
42  
43  
44  
45  
46  
47  
48  
49  
50  
51  
52  
53  
54  
55  
56  
57  
58  
59  
60

240 **Table 2.** Proportion of adolescents with 1, 2 or 3+ emergency admission(s) for injury or 1, 2 or 3+ admission(s) of any type, by  
 241 types of adversity between 10 and 19 years old\*

| Adolescent group*           | No. girls      | Girls (%)                         |             |            |                          |             |             | No. boys       | Boys (%)                          |             |            |                          |             |             |
|-----------------------------|----------------|-----------------------------------|-------------|------------|--------------------------|-------------|-------------|----------------|-----------------------------------|-------------|------------|--------------------------|-------------|-------------|
|                             |                | Emergency admission(s) for injury |             |            | Admission(s) of any type |             |             |                | Emergency admission(s) for injury |             |            | Admission(s) of any type |             |             |
|                             |                | 1                                 | 2           | 3+         | 1                        | 2           | 3+          |                | 1                                 | 2           | 3+         | 1                        | 2           | 3+          |
| <b>All</b>                  | <b>144,158</b> | <b>88.6</b>                       | <b>8.3</b>  | <b>3.1</b> | <b>57.6</b>              | <b>20.5</b> | <b>22.0</b> | <b>258,503</b> | <b>90.3</b>                       | <b>8.0</b>  | <b>1.8</b> | <b>68.5</b>              | <b>18.7</b> | <b>12.9</b> |
| <b>Adversity</b>            | <b>72,805</b>  | <b>82.7</b>                       | <b>12.0</b> | <b>5.3</b> | <b>53.8</b>              | <b>21.1</b> | <b>25.1</b> | <b>68,403</b>  | <b>83.5</b>                       | <b>12.4</b> | <b>4.1</b> | <b>64.8</b>              | <b>19.4</b> | <b>15.8</b> |
| Any violence                | 6,211          | 77.2                              | 13.9        | 8.9        | 49.1                     | 20.7        | 30.1        | 32,799         | 83.2                              | 12.8        | 4.0        | 65.6                     | 19.6        | 14.8        |
| Any self-harm               | 54,315         | 79.3                              | 13.9        | 6.8        | 51.2                     | 21.5        | 27.3        | 21,087         | 76.7                              | 15.8        | 7.5        | 57.0                     | 20.7        | 22.3        |
| Any drug or alcohol misuse  | 66,645         | 81.9                              | 12.5        | 5.6        | 53.6                     | 21.1        | 25.3        | 41,014         | 81.1                              | 13.6        | 5.3        | 62.9                     | 19.5        | 17.6        |
| <b>Single adversity</b>     | <b>19,924</b>  | <b>92.8</b>                       | <b>6.2</b>  | <b>1.0</b> | <b>61.2</b>              | <b>19.8</b> | <b>19.0</b> | <b>43,563</b>  | <b>71.3</b>                       | <b>8.3</b>  | <b>1.8</b> | <b>55.8</b>              | <b>15.2</b> | <b>10.3</b> |
| Violence only               | 3,734          | 92.4                              | 6.3         | 1.3        | 58.1                     | 20.4        | 21.6        | 24,912         | 87.1                              | 10.6        | 2.2        | 68.3                     | 19.2        | 12.6        |
| Self-harm only              | 2,296          | 90.3                              | 8.1         | 1.6        | 54.4                     | 20.7        | 24.9        | 2,260          | 87.3                              | 10.4        | 2.3        | 62.3                     | 19.8        | 17.9        |
| Drug or alcohol misuse only | 13,894         | 93.3                              | 5.9         | 0.8        | 63.2                     | 19.5        | 17.4        | 16,391         | 88.5                              | 9.5         | 2.1        | 69.9                     | 17.9        | 12.2        |
| <b>Multiple adversity</b>   | <b>52,881</b>  | <b>78.9</b>                       | <b>14.2</b> | <b>6.9</b> | <b>51.0</b>              | <b>21.6</b> | <b>27.4</b> | <b>24,840</b>  | <b>77.3</b>                       | <b>16.7</b> | <b>7.5</b> | <b>59.0</b>              | <b>21.0</b> | <b>21.5</b> |
| V + SH                      | 130            | 70.0                              | 20.8        | 9.2        | 42.3                     | 26.2        | 31.5        | 217            | 41.6                              | 15.4        | 6.1        | 32.8                     | 16.0        | 14.2        |

1  
2  
3  
4  
5  
6  
7  
8  
9  
10  
11  
12  
13  
14  
15  
16  
17  
18  
19  
20  
21  
22  
23  
24  
25  
26  
27  
28  
29  
30  
31  
32  
33  
34  
35  
36  
37  
38  
39  
40  
41  
42  
43  
44  
45  
46  
47  
48  
49

|                       |               |             |            |            |             |             |             |                |             |            |            |             |             |             |
|-----------------------|---------------|-------------|------------|------------|-------------|-------------|-------------|----------------|-------------|------------|------------|-------------|-------------|-------------|
| V + DA                | 862           | 81.9        | 15.1       | 3.0        | 52.2        | 22.9        | 24.9        | 6,013          | 84.6        | 17.5       | 5.4        | 68.4        | 21.8        | 17.3        |
| SH + DA               | 50,404        | 80.1        | 13.7       | 6.3        | 51.8        | 21.6        | 26.6        | 16,953         | 86.7        | 16.4       | 6.9        | 64.6        | 22.7        | 22.9        |
| V + SH + DA           | 1,485         | 36.8        | 31.6       | 31.5       | 25.5        | 19.9        | 54.5        | 1,657          | 22.0        | 16.4       | 14.1       | 17.9        | 11.7        | 22.8        |
| No adversity          | 71,353        | 94.7        | 4.5        | 0.8        | 61.4        | 19.9        | 18.7        | 190,100        | 92.4        | 6.3        | 0.9        | 69.5        | 18.3        | 11.8        |
| <b>Accidents only</b> | <b>59,465</b> | <b>95.3</b> | <b>4.1</b> | <b>0.6</b> | <b>66.5</b> | <b>18.7</b> | <b>14.7</b> | <b>174,267</b> | <b>92.3</b> | <b>6.5</b> | <b>0.9</b> | <b>71.1</b> | <b>18.0</b> | <b>10.5</b> |
| <b>Other causes</b>   | <b>11,888</b> | <b>91.5</b> | <b>6.3</b> | <b>2.1</b> | <b>35.5</b> | <b>25.8</b> | <b>38.8</b> | <b>15,833</b>  | <b>93.4</b> | <b>5.0</b> | <b>1.6</b> | <b>51.5</b> | <b>22.1</b> | <b>26.3</b> |

242 V = Violence, SH = Self-harm, DA = Drug or Alcohol Misuse  
 243 \* Each adolescent classified by all adversity/accidents seen at any emergency admission(s) for injury between 10 and 19 years old.

Peer review only

1  
2  
3  
4 244 **Emergency re-admissions for injury**

5  
6 245 Adolescent girls in the adversity group (50.5% of all girls in the cohort)  
7  
8 246 accounted for 50.0% of the total number of emergency admissions for injury  
9  
10 247 coming from girls (data not shown), compared with girls in the accidents only  
11  
12 248 group (41.3% of all girls) who accounted for 36.6%. Boys in the adversity  
13  
14 249 group (26.2% of all boys in the cohort) accounted for 29.1% compared with  
15  
16 250 65.0% contributed by boys in the accidents only group (67.7% of all boys).

17  
18 251 More adolescents in the adversity group were re-admitted for injury  
19  
20 252 (i.e., had two or more emergency admissions for injury) between 10 and 19  
21  
22 253 years old (girls 17.3%, boys 16.5%) (Figure 2), than in the accidents only  
23  
24 254 group (girls 4.7%; boys 7.4%). Among adolescents admitted for injuries  
25  
26 255 related to multiple types of adversity (Table 2), the proportion re-admitted was  
27  
28 256 even higher (multiple types: girls 21.1%, boys 24.2%; single type: girls 7.2%,  
29  
30 257 boys 10.1%).

31  
32  
33  
34 258 Similarly, a higher proportion of adolescents in the adversity group had  
35  
36 259 two more admissions of any type (including non-emergency and non-injury)  
37  
38 260 between 10 and 19 years old (girls 46.2%; boys 35.2%) (Table 2) compared  
39  
40 261 with adolescents in the accidents only group (girls 33.4%; boys 28.5%). This  
41  
42 262 proportion was even higher for adolescents in the adversity group who were  
43  
44 263 admitted with multiple types of adversity (multiple types: girls 49.0%, boys  
45  
46 264 42.5%; single type: girls 38.8%, boys 25.5%).  
47  
48  
49  
50  
51  
52  
53  
54  
55  
56  
57  
58  
59  
60

1  
2  
3 265 **DISCUSSION**  
4

5 266 More than one in 20 adolescents in England had at least one emergency  
6  
7 267 admission for adversity-related injury between 10 and 19 years old. These  
8  
9 268 adolescents accounted for a third of all adolescents with emergency  
10  
11 269 admissions for injury and for a disproportionate number of re-admissions for  
12  
13 270 injury, particularly adolescents admitted with multiple types of adversity-  
14  
15 271 related injury. Targeting adolescents admitted with adversity-related injury  
16  
17 272 could reduce their risk of future harm, the rate of re-admissions to hospital,  
18  
19 273 and health care costs .[25]  
20

21  
22  
23 274 Longitudinally-linked admissions allowed us to study the entire ten  
24  
25 275 years of adolescence in 402 916 individuals. We were able to distinguish  
26  
27 276 between types of adversity that co-occurred during adolescence or at the  
28  
29 277 same admission, and to study re-admissions. One weakness of this study  
30  
31 278 was our reliance on diagnostic codes recorded in administrative data.  
32  
33  
34 279 Violence by carers, which could be coded under maltreatment, and drug or  
35  
36 280 alcohol misuse have been shown to be under-recorded using ICD-10,[26 27]  
37  
38 281 but false positives are rare.[15] To address under-recording, we used what  
39  
40 282 we considered to be sensitive clusters of codes for adversity. Other factors  
41  
42 283 related to recording or coding practices,[12 14 15 27 28] for example, new  
43  
44 284 guidelines for defining maltreatment,[14] can also affect ascertainment.  
45  
46  
47 285 Because of the relative insensitivity but good specificity of the coding clusters,  
48  
49 286 some adolescents who were classified in the accidents only group may in fact  
50  
51 287 belong to the adversity group, but did not have their adversity recognised or  
52  
53 288 recorded. Consequently, our prevalence estimates of admission for different  
54  
55 289 types of adversity-related injury are likely to provide a lower bound for the true  
56  
57  
58  
59  
60

1  
2  
3 290 prevalence. Further, as adolescents exposed to adversity who attended the  
4  
5 291 accident and emergency (A&E) department were not necessarily admitted,  
6  
7 292 our prevalence estimates represent adolescents at the severe end of the  
8  
9  
10 293 adversity spectrum. Such analyses of A&E data are limited by the quality of  
11  
12 294 these data in England (available since 2007) and the resulting problems with  
13  
14 295 identifying reasons for presentation and accurately linking individuals to long-  
15  
16 296 term outcomes.[29]

17  
18 297 Our prevalence estimates of admission for injury related to individual  
19  
20 298 types of adversity from the general adolescent population are consistent with  
21  
22 299 previous reports for emergency admissions for assault-related injury in 2004-  
23  
24 300 2009 and for all admissions (emergency and non-emergency) for self-harm  
25  
26 301 and drug or alcohol misuse.[1 2 24 30] Previous studies have reported higher  
27  
28 302 rates of drug or alcohol misuse in boys than in girls in the general adolescent  
29  
30 303 population.[24] We found higher rates in girls. This difference could indicate  
31  
32 304 that girls exposed to drug or alcohol misuse are more likely to be injured, to  
33  
34 305 present to hospital, or to be admitted after a hospital presentation, than boys.  
35  
36  
37

38 306 Our estimated rates of re-admission of any type (including non-  
39  
40 307 emergency and non-injury) for violence (girls 50.8%, boys 34.4%) (Table 2)  
41  
42 308 and self-harm (girls 48.8%, boys 43.0%) were higher than previously reported  
43  
44 309 (11% for violence, 33% for self-harm).[3 4] These discrepancies are likely to  
45  
46 310 be because we considered the whole ten years of adolescence and re-  
47  
48 311 admission of any type, whereas previous studies looked at re-attendance up  
49  
50 312 to the following year and for the same type of adversity-related injury.[3 4]  
51  
52

53 313 The results of this study should inform policy initiatives and national  
54  
55 314 guidelines. Firstly, a substantial proportion of adolescents are affected by  
56  
57  
58  
59  
60

1  
2  
3 315 adversity and they account for a large proportion (29.1 to 50.0%) of all  
4  
5 316 emergency admissions to hospital for injury in this age group. Secondly, we  
6  
7 317 show the large burden of injury admission for all three types of adversity, yet  
8  
9 318 there are currently no national clinical guidelines for managing cases of  
10  
11 319 violence, other than responding to violence by caregivers.[31] Finally, these  
12  
13 320 results show that adolescents often present with multiple types of adversity  
14  
15 321 (especially in girls), even though guidelines exist only for managing individual  
16  
17 322 problems.[32-34]

20  
21 323 In addition, policy makers need to be aware of the widely varying  
22  
23 324 aetiological pathways to admission with adversity-related injury. Our  
24  
25 325 approach to defining this group of adolescents is not designed to reflect the  
26  
27 326 complexity or severity of these cases. For example, admission for multiple  
28  
29 327 types of adversity-related injury is a poor proxy indicator of severity. Effective  
30  
31 328 interventions will need to be tailored to the individual based on specialist  
32  
33 329 clinical assessment. However, all three types of adversity are likely to reflect  
34  
35 330 a combination of underlying psychosocial need and environmental and social  
36  
37 331 stressors.[35]

40  
41 332 Hospital interventions may reduce the risk of future harm, including the  
42  
43 333 incidence of other types of harm not seen in hospital, e.g., further adversity-  
44  
45 334 related injury not leading to admission. Further research using linked data  
46  
47 335 from health care sectors such as accident and emergency, could shed light on  
48  
49 336 the overall burden of adversity-related injury on hospitals. Though these data  
50  
51 337 have limited quality in England, longitudinally-linked datasets in other  
52  
53 338 countries could provide insights into long-term outcomes for this vulnerable  
54  
55 339 group of adolescents.

1  
2  
3  
4  
5 340 **Contributors**  
6

7 341 Annie Herbert – helped to conceive and design the study, analysed and  
8  
9 342 interpreted the data, drafted the article, revised it critically for important  
10  
11 343 intellectual content and approved the final version to be published.

12  
13 344 Leah Li – helped to conceive and design the study, interpreted the data,  
14  
15 345 revised the article critically for important intellectual content and approved the  
16  
17 346 final version to be published.

18  
19 347 Arturo González-Izquierdo – helped to conceive and design the study,  
20  
21 348 acquired and interpreted the data, revised the article critically for important  
22  
23 349 intellectual content and approved the final version to be published.

24  
25 350 Ruth Gilbert – helped to conceive and design the study, acquired and  
26  
27 351 interpreted the data, revised the article critically for important intellectual  
28  
29 352 content and approved the final version to be published.

30  
31 353  
32 354 **Competing interests** None.  
33

34  
35  
36 355

37  
38 356 **Funding** AH was supported by the Policy Research Unit in the Health of  
39  
40 357 Children, Young People and Families, which is funded by the Department of  
41  
42 358 Health Policy Research Programme (grant reference number: 109/0001).  
43  
44 359 This report is an independent research commissioned by the Department of  
45  
46 360 Health. The views expressed in this publication are those of the authors and  
47  
48 361 not necessarily those of the Department of Health. AH is also supported by  
49  
50 362 the University College London IMPACT studentship. RG is supported by  
51  
52 363 awards establishing the Farr Institute of Health Informatics Research at  
53  
54 364 University College London Partners from the Medical Research Council and a  
55  
56  
57  
58  
59  
60



1  
2  
3 365 consortium of funders (MR/K006584/1). The study funders played no part in  
4  
5 366 the design, data analysis and interpretation of this study; the writing of the  
6  
7 367 manuscript or the decision to submit the paper for publication, and the  
8  
9  
10 368 authors' work was independent of their funders.

369

14 370 **Ethics** Both Hospital Episode Statistics (HES) admissions data and Office for  
15  
16 371 National Statistics (ONS) mid-year population estimates are derived from  
17  
18 372 routinely collected administrative data. HES data were pseudonymised  
19  
20  
21 373 before we received them and therefore we did not require Research Ethics  
22  
23 374 Committee approval.

375

27 376 **Data sharing** No additional data on HES are available. ONS mid-year  
28  
29 377 population estimates may be accessed freely online:  
30  
31  
32 378 [http://www.ons.gov.uk/ons/publications/all-](http://www.ons.gov.uk/ons/publications/all-releases.html?definition=tcm%3A77-22371)  
33  
34 379 [releases.html?definition=tcm%3A77-22371](http://www.ons.gov.uk/ons/publications/all-releases.html?definition=tcm%3A77-22371).

## 380 REFERENCES

- 381 1. Bellis MA, Hughes K, Wood S, et al. National five-year examination  
382 of inequalities and trends in emergency hospital admission for  
383 violence across England. *Injury prevention : journal of the*  
384 *International Society for Child and Adolescent Injury*  
385 *Prevention* 2011;**17**(5):319-25 doi:  
386 10.1136/ip.2010.030486[published Online First: Epub Date]].
- 387 2. Hawton K, Rodham K, Evans E, et al. Deliberate self harm in  
388 adolescents: self report survey in schools in England. *Bmj*  
389 2002;**325**(7374):1207-11
- 390 3. Meuleners LB, Lee AH, Hendrie D. Interpersonal violence  
391 hospitalisations for adolescents: A population-based study.  
392 *Journal of paediatrics and child health* 2010;**46**(11):686-90  
393 doi: 10.1111/j.1440-1754.2010.01818.x[published Online  
394 First: Epub Date]].
- 395 4. Lilley R, Owens D, Horrocks J, et al. Hospital care and repetition  
396 following self-harm: multicentre comparison of self-poisoning  
397 and self-injury. *The British Journal of Psychiatry*  
398 2008;**192**(6):440-45
- 399 5. Snider C, Lee J. Youth violence secondary prevention initiatives in  
400 emergency departments: a systematic review. *Cjem*  
401 2009;**11**(2):161-8
- 402 6. Ougrin D, Boege I, Stahl D, et al. Randomised controlled trial of  
403 therapeutic assessment versus usual assessment in adolescents  
404 with self-harm: 2-year follow-up. *Archives of disease in*  
405 *childhood* 2013;**98**(10):772-6 doi: 10.1136/archdischild-2012-  
406 303200[published Online First: Epub Date]].
- 407 7. Crawford MJ, Patton R, Touquet R, et al. Screening and referral for  
408 brief intervention of alcohol-misusing patients in an emergency  
409 department: a pragmatic randomised controlled trial. *The*  
410 *Lancet*;364(9442):1334-39 doi:  
411 [http://dx.doi.org/10.1016/S0140-6736\(04\)17190-](http://dx.doi.org/10.1016/S0140-6736(04)17190-0)  
412 [0](http://dx.doi.org/10.1016/S0140-6736(04)17190-0)[published Online First: Epub Date]].
- 413 8. Johnson SB, Bradshaw CP, Wright JL, et al. Characterizing the  
414 teachable moment: is an emergency department visit a  
415 teachable moment for intervention among assault-injured  
416 youth and their parents? *Pediatric emergency care*  
417 2007;**23**(8):553-59
- 418 9. Inpatient HES Data Dictionary. Leeds: Health and Social Care  
419 Information Centre, 2010.

- 1  
2  
3 420 10. World Health Organisation. Adolescent Health. Secondary  
4 421 Adolescent Health 2013.  
5  
6 422 [http://www.who.int/topics/adolescent\\_health/en/](http://www.who.int/topics/adolescent_health/en/).
- 7 423 11. National Health Service Act, 2006.
- 8  
9 424 12. Gonzalez-Izquierdo A, Woodman J, Copley L, et al. Variation in  
10 425 recording of child maltreatment in administrative records of  
11 426 hospital admissions for injury in England, 1997-2009. Archives  
12 427 of disease in childhood 2010;**95**(11):918-25 doi:  
13 428 10.1136/adc.2009.180216[published Online First: Epub Date]].
- 14  
15 429 13. International Statistical Classification of Diseases and Related  
16 430 Health Problems 10th Revision. Secondary International  
17 431 Statistical Classification of Diseases and Related Health  
18 432 Problems 10th Revision.  
19 433 <http://apps.who.int/classifications/icd10/browse/2010/en>.
- 20  
21 434 14. Saperia J, Lakhanpaul M, Kemp A, et al. When to suspect child  
22 435 maltreatment: summary of NICE guidance. Bmj  
23 436 2009;**339**:b2689 doi: 10.1136/bmj.b2689[published Online  
24 437 First: Epub Date]].
- 25  
26 438 15. Gonzalez-Izquierdo A, Ward A, M OD, et al. Cross-country  
27 439 comparison of victimisation-related injury admission in  
28 440 children and adolescents in England and Western Australia.  
29 441 BMC Health Serv Res 2013;**13**(1):260 doi: 10.1186/1472-  
30 442 6963-13-260[published Online First: Epub Date]].
- 31  
32 443 16. Patton GC, Viner R. Pubertal transitions in health. Lancet  
33 444 2007;**369**(9567):1130-9 doi: 10.1016/S0140-6736(07)60366-  
34 445 3[published Online First: Epub Date]].
- 35  
36 446 17. Gill T. How old are GCSE candidates? Statistics Report Series,  
37 447 2010.
- 38  
39 448 18. Directgov. AS and A levels. Secondary AS and A levels 2012.  
40 449 <http://webarchive.nationalarchives.gov.uk/20121015000000/>  
41 450 [http://www.direct.gov.uk/en/EducationAndLearning/Qualific](http://www.direct.gov.uk/en/EducationAndLearning/QualificationsExplained/DG_10039018)  
42 451 [ationsExplained/DG\\_10039018](http://www.direct.gov.uk/en/EducationAndLearning/QualificationsExplained/DG_10039018).
- 43  
44 452 19. Buying Alcohol. Secondary Buying Alcohol 2013.  
45 453 [https://www.drinkaware.co.uk/check-the-facts/alcohol-and-](https://www.drinkaware.co.uk/check-the-facts/alcohol-and-the-law/buying-alcohol)  
46 454 [the-law/buying-alcohol](https://www.drinkaware.co.uk/check-the-facts/alcohol-and-the-law/buying-alcohol).
- 47  
48 455 20. All releases of Population Estimates for UK, England and Wales,  
49 456 Scotland and Northern Ireland: Office for National Statistics,  
50 457 2013.
- 51  
52 458 21. Office for National Statistics. Mid-year population estimates short  
53 459 methods guide: Office for National Statistics, 2010.
- 54  
55 460 22. Radford L. Child abuse and neglect in the UK today. NSPCC  
56 461 Research: NSPCC, 2011.

- 1  
2  
3 462 23. *Truth hurts: report of the national inquiry into self-harm among*  
4 463 *young people*. London: Mental Health Foundation, 2006.  
5  
6 464 24. Hibell B, Guttormsson U, Ahlström S, et al. The 2011 ESPAD  
7 465 Report. Substance use among students in 2012;**36**  
8  
9 466 25. National Audit Office. Emergency admissions to hospital:  
10 467 managing the demand, 2013.  
11 468 26. Scott D, Tonmyr L, Fraser J, et al. The utility and challenges of  
12 469 using ICD codes in child maltreatment research: A review of  
13 470 existing literature. *Child abuse & neglect* 2009;**33**(11):791-808  
14 471 doi: S0145-2134(09)00202-6 [pii]  
15 472 10.1016/j.chiabu.2009.08.005[published Online First: Epub Date]].  
16  
17 473 27. McKenzie K, Harrison JE, McClure RJ. Identification of alcohol  
18 474 involvement in injury-related hospitalisations using routine  
19 475 data compared to medical record review. *Australian and New*  
20 476 *Zealand journal of public health* 2010;**34**(2):146-52 doi:  
21 477 10.1111/j.1753-6405.2010.00499.x[published Online First:  
22 478 Epub Date]].  
23  
24 479 28. Farrar S, Yi D, Sutton M, et al. Has payment by results affected the  
25 480 way that English hospitals provide care? Difference-in-  
26 481 differences analysis. *Bmj* 2009;**339** doi:  
27 482 10.1136/bmj.b3047[published Online First: Epub Date]].  
28  
29 483 29. Hospital Episode Statistics Accident & Emergency (England),  
30 484 2007-. Secondary Hospital Episode Statistics Accident &  
31 485 Emergency (England), 2007-.  
32 486 <http://adrn.ac.uk/catalogue/cataloguepage?sn=888040>.  
33  
34 487 30. Hawton K, Rodham K, Evans E, et al. Adolescents Who Self Harm:  
35 488 A Comparison of Those Who Go to Hospital and Those Who Do  
36 489 Not. *Child Adol Ment H-Uk* 2009;**14**(1):24-30 doi: DOI  
37 490 10.1111/j.1475-3588.2008.00485.x[published Online First:  
38 491 Epub Date]].  
39  
40 492 31. What to do if you're worried that a child is being abused. In: Skills  
41 493 DfE, ed.: DfES Publications, 2006.  
42  
43 494 32. Self-harm: longer term management [Clinical Guideline 133].  
44 495 London: National Institute for Health and Clinical Excellence,  
45 496 2011.  
46  
47 497 33. Drug misuse : psychosocial interventions [Clinical Guideline 51].  
48 498 London: National Institute for Health and Clinical Excellence,,  
49 499 2007.  
50  
51 500 34. Alcohol-use disorder: diagnosis, assessment and management of  
52 501 harmful drinking and alcohol dependence [Clinical Guideline  
53 502 115]. London: National Institute for Health and Clinical  
54 503 Excellence, 2011.  
55  
56  
57  
58  
59  
60

1  
2  
3  
4  
5  
6  
7  
8  
9  
10  
11  
12  
13  
14  
15  
16  
17  
18  
19  
20  
21  
22  
23  
24  
25  
26  
27  
28  
29  
30  
31  
32  
33  
34  
35  
36  
37  
38  
39  
40  
41  
42  
43  
44  
45  
46  
47  
48  
49  
50  
51  
52  
53  
54  
55  
56  
57  
58  
59  
60

504 35. Viner RM, Ozer EM, Denny S, et al. Adolescence and the social  
505 determinants of health. Lancet 2012;**379**(9826):1641-52 doi:  
506 10.1016/S0140-6736(12)60149-4[published Online First:  
507 Epub Date]].  
508

For peer review only

1  
2  
3  
4  
5  
6  
7  
8 **1 Violence, self-harm and drug or alcohol misuse in**  
9  
10 **2 adolescents admitted to hospitals in England for injury: a**  
11  
12 **3 retrospective cohort study**  
13  
14  
15

16 Annie Herbert, Centre for Paediatric Epidemiology & Biostatistics, University  
17 College London Institute of Child Health, 30 Guilford Street, London, WC1N  
18 1EH, Tel: +44207 905 2790, Fax: +44207 905 2793,  
19 [annie.herbert.12@ucl.ac.uk](mailto:annie.herbert.12@ucl.ac.uk)  
20  
21  
22  
23

24  
25  
26 *Annie Herbert, M.Sc.<sup>1</sup>, Ruth Gilbert, M.D.<sup>1</sup>, Arturo González-*  
27 *Izquierdo, Ph.D.<sup>1</sup>, Leah Li, Ph.D.<sup>1</sup>*  
28  
29  
30

31  
32 1. Centre for Paediatric Epidemiology & Biostatistics, University College  
33 London Institute of Child Health, 30 Guilford Street, London, WC1N 1EH, UK  
34  
35

36 Short title: Adversity in adolescents admitted to hospital for injury  
37

38 *Key words: Wounds and Injuries, Violence, Self-injurious Behaviour,*  
39 *Substance-related Disorders, Adolescent*  
40  
41

42  
43  
44 | Word count: 2, **565604**  
45

46 | No. figures: 2  
47

48 | No tables: 2  
49

50 | No references: 35  
51

52 | No supplementary files for online only publication: 5  
53  
54  
55  
56  
57  
58  
59  
60

24

**25 ABSTRACT****26 Objectives**

27 Of adolescents in the general population in England, we aimed to determine  
28 1) the proportion that has an emergency admission to hospital for injury  
29 related to adversity (violence, self-harm or drug or alcohol misuse) and 2) the  
30 risk of recurrent emergency admissions for injury in adolescents admitted with  
31 adversity-related injury compared with those admitted with accident-related  
32 injury only.

**33 Design**

34 We used longitudinally-linked administrative hospital data (Hospital Episode  
35 Statistics) to identify 10-19 year olds with emergency admissions for injury  
36 (including day cases lasting more than four hours), in England in 1998-2011.  
37 We used Office for National Statistics mid-year estimates for population  
38 denominators.

**39 Results**

40 Approximately 4.3% (n=141 248) of adolescents in the general population  
41 (n=3 254 046) had one or more emergency admissions for adversity-related  
42 injury (girls 4.6%, boys 4.1%), accounting for 50.0% of all emergency  
43 admissions for injury in girls and 29.1% in boys. Admissions for self-harm or  
44 drug or alcohol misuse commonly occurred in the same girls and boys.  
45 Recurrent emergency admissions for injury were more common in  
46 adolescents with adversity-related injury (girls 17.3%; boys 16.5%) than in  
47 those with accident-related injury only (girls 4.7%; boys 7.4%), particularly for

2

1  
2  
3  
4  
5  
6 48 adolescents with adversity-related injury related to multiple types of adversity  
7  
8 49 (girls 21.1%; boys 24.2%).  
9

10 **Conclusion**

11 Hospital-based interventions should be developed to reduce the risk of future  
12  
13  
14 52 injury in adolescents admitted for adversity-related injury.  
15  
16  
17  
18  
19  
20  
21  
22  
23  
24  
25  
26  
27  
28  
29  
30  
31  
32  
33  
34  
35  
36  
37  
38  
39  
40  
41  
42  
43  
44  
45  
46  
47  
48  
49  
50  
51  
52  
53  
54  
55  
56  
57  
58  
59  
60



1  
2  
3  
4  
5  
6 53 **What is already known on this subject**  
7

- 8 54 • Adolescents exposed to adversity (violence, self-harm or drug or  
9 alcohol misuse) often use health services, and repetitively.  
10 55  
11 56 • Many adolescents in the general population are exposed to multiple  
12 types of adversity during their adolescence.  
13 57  
14 58

15  
16  
17  
18 59 **What this study adds**  
19

- 20 60 • One in 20 adolescents in England has an emergency admission to  
21 hospital for adversity-related injury between 10 and 19 years old.  
22 61  
23 62 • Many adolescents admitted with adversity-related injury (particularly  
24 girls) are admitted with multiple types of adversity, self-harm and drug  
25 or alcohol misuse being the most common combination.  
26 63  
27 64 • Re-admission is more common in these adolescents than those  
28 admitted with accident-related injury only.  
29 65  
30 66  
31 67  
32 68

33  
34  
35  
36 68 **Strengths and limitations of this study**  
37

- 38 69 • Hospital Episodes Statistics (HES) captured data on all admissions to  
39 National Health Service hospitals in England at 10-19 years old in this  
40 study's cohort.  
41 70  
42 71 • The longitudinal link between admissions for each individual in HES  
43 data allowed us to study the burden of multiple emergency admissions  
44 for injury over time.  
45 72  
46 73 • However, violence, self-harm and drug or alcohol misuse are not  
47 always recognised at an admission, or consistently recorded, and  
48 74  
49 75  
50 76  
51  
52  
53  
54  
55  
56  
57  
58  
59  
60

1  
2  
3  
4  
5  
6 77 therefore this study's estimates of prevalence of adversity are likely to  
7  
8 78 be underestimates.  
9  
10  
11  
12  
13  
14  
15  
16  
17  
18  
19  
20  
21  
22  
23  
24  
25  
26  
27  
28  
29  
30  
31  
32  
33  
34  
35  
36  
37  
38  
39  
40  
41  
42  
43  
44  
45  
46  
47  
48  
49  
50  
51  
52  
53  
54  
55  
56  
57  
58  
59  
60

For peer review only

## 79 INTRODUCTION

80 Many adolescents exposed to adversity such as violence, self-harm, or drug  
81 or alcohol misuse use secondary health services,[1 2] often repetitively.[3 4]  
82 For example, in a self-report survey of 15-16 year olds in England, 12.6% of  
83 those who had self-harmed had presented to hospital.[2] It is also estimated  
84 that approximately one-third of patients attending a hospital in England for  
85 self-harm re-attend for self-harm in the following year.[4] Improved  
86 management of adolescents exposed to adversity could reduce risk of  
87 repetition as well as the burden on secondary care.[5-7]

88 An admission to hospital provides the 'teachable moment'. [8] That is,  
89 both adolescents and their families may be more likely to engage with an  
90 intervention than if they had received it elsewhere. Hospital-based  
91 interventions to reduce the risk of future harm could benefit these adolescents  
92 by reducing episodes of injury, and may reduce recurrent emergency (i.e.,  
93 acute or unplanned) admissions for injury.

94 To date, there is a lack of evidence on how different types of adversity-  
95 related injury occur in the same adolescents over time. In addition, policy  
96 makers and service providers need to know how many adolescents have an  
97 emergency admission to hospital for adversity-related injury, their  
98 characteristics and their specific rates of re-admission if they are to be  
99 feasibly targeted for intervention.

100 In this study we used administrative hospital data and Office for  
101 National Statistics (ONS) mid-year population estimates to estimate the  
102 number of adolescents in the general population who have ever had an  
103 emergency admission to hospital for injury. We then estimated the

1  
2  
3  
4  
5  
6 104 prevalence of emergency admissions for injury related to violence, self-harm  
7  
8 105 and drug or alcohol misuse (alone and co-occurring) in the general  
9  
10 106 population. Finally, we determined the risk of recurrent emergency  
11  
12 107 admissions for injury in adolescents who had at least one admission between  
13  
14 108 10 and 19 years for adversity-related injury compared with adolescents only  
15  
16 109 ever admitted for accidental injury during the same period.  
17  
18  
19  
20  
21  
22  
23  
24  
25  
26  
27  
28  
29  
30  
31  
32  
33  
34  
35  
36  
37  
38  
39  
40  
41  
42  
43  
44  
45  
46  
47  
48  
49  
50  
51  
52  
53  
54  
55  
56  
57  
58  
59  
60

1  
2  
3  
4  
5  
6  
7  
8 110 **METHODS**

9  
10 111 **Study population**

112 Using administrative data from all admissions to National Health Service  
113 hospitals in England (Hospital Episode Statistics [HES]) in 1998-2011,[9] we  
114 derived a retrospective cohort of adolescents who turned 10 years old in  
115 1998-2002, who could be observed throughout adolescence until 19 years old  
116 (Supplementary Table 1).[10] Each individual also had to have at least one  
117 emergency admission for injury between 10 and 19 years old.

118 **Admission data**

119 The Health and Social Care Information Centre provided pseudonymised data  
120 on hospital admissions, use of which did not require Research Ethics  
121 Committee approval.[11] An admission is defined by the National Health  
122 Service as any hospital case lasting longer than four hours, and so includes  
123 long day cases as well as overnight stays. We analysed any hospital  
124 transfers or admissions within one day after discharge as the same  
125 admission, as previously described.[12] We used the variable for method of  
126 admission ('admimeth') to define an emergency admission. We used all  
127 International Classification of Diseases-10 (ICD-10) diagnosis codes recorded  
128 during an admission to categorise admissions as being for injury related to  
129 adversity or an accident (Supplementary Table 2).[13]

130 **Types of injury and age at emergency admission**

131 We defined an emergency admission for injury as being related to adversity,  
132 comprising violence (maltreatment/assault/undetermined causes of injury),

1  
2  
3  
4  
5  
6 133 self-harm or drug or alcohol misuse, using mutually exclusive clusters of ICD-  
7  
8 134 10 codes (Supplementary Table 2). Violence was defined by previously-  
9  
10 135 validated codes, which would trigger consideration of violence by carers,  
11  
12 136 peers or strangers.[12 14 15] We defined self-harm using codes that  
13  
14 137 mentioned either 'self-harm' or 'self-poisoning'. Drug or alcohol misuse was  
15  
16 138 defined by codes that mentioned 'alcohol', 'drugs', 'noxious substance' or  
17  
18 139 'solvent'. We defined an injury as being related to accidents only if no  
19  
20 140 adversity codes were present but there were codes from the ICD-10  
21  
22 141 *Accidents* subchapter (V01-X59).[13]

23  
24 142 We grouped age at each admission to reflect age of onset of puberty  
25  
26 143 (10-14 years), age of sitting secondary school exams (15-17 years) and the  
27  
28 144 legal age for buying alcohol (18-19 years).[16-19]

29  
30 145 **Classification of adolescents according to types of injury and age at**  
31  
32 146 **emergency admissions**

33  
34 147 We classed adolescents into groups according to all of their emergency  
35  
36 148 admissions for injury between 10 and 19 years old. Adolescents were  
37  
38 149 classed as belonging to the 'adversity' group (any adversity-related injury  
39  
40 150 between 10 and 19 years old), 'accidents only' group (no adversity-related  
41  
42 151 injury but one or more accident-related injuries) or 'other causes' group (no  
43  
44 152 adversity-related or accident-related injuries) (Supplementary Figure 1).  
45  
46 153 Among adolescents in the adversity group, we determined the proportion  
47  
48 154 exposed to violence-, self-harm- and drug or alcohol misuse-related injury at  
49  
50 155 age 10-19, respectively. We further classified the adversity group into seven  
51  
52 156 mutually exclusive sub-groups: violence only, self-harm only, drug or alcohol  
53  
54 157 misuse only, violence and self-harm, violence and drug or alcohol misuse,  
55

1  
2  
3  
4  
5  
6 158 self-harm and drug or alcohol misuse, and violence, self-harm and drug or  
7  
8 159 alcohol misuse.

9  
10 160 We also grouped adolescents as above, according to their emergency  
11  
12 161 admissions for injury at 10-14 years only, 15-17 years only and 18-19 years  
13  
14 162 only (Supplementary Figure 2).

### 163 **Population denominators**

164 We used ONS mid-year population estimates to derive population  
165 denominators.[20 21] These data are freely available online broken down by  
166 sex and year of age.

### 167 **Analyses**

168 We estimated the proportion of adolescents in the general population who had  
169 an emergency admission for injury between 10 and 19 years old. We used  
170 the number of adolescents in our derived retrospective cohort as the  
171 numerator and ONS mid-year estimates for 10 year olds in 1998-2002 as the  
172 population denominator. We then calculated these proportions by types of  
173 injury at 10-19 years old (adversity-related [adversity group and seven  
174 mutually exclusive subgroups] and accidents only [accidents only group]) and  
175 by age group, as described above.

176 We calculated the proportion of adolescents in the adversity group (and  
177 subgroups) and in the accidents only group who had an emergency admission  
178 for injury twice and three or more times between 10 and 19 years old. We  
179 also calculated the proportions of adolescents with two or three or more  
180 admissions of any type (including non-emergency and non-injury).

181 We reported all results separately for girls and boys since differences  
182 between girls and boys have been reported for prevalence of adversity in the

1  
2  
3  
4  
5  
6 183 general population.[1 22-24] We calculated 95% confidence intervals for all  
7  
8 184 proportions but did not present them here as they were all too narrow to  
9  
10 185 convey any useful information (within one unit of the sample estimate).  
11  
12 186 Analyses were carried out in StataSE 12.  
13  
14  
15  
16  
17  
18  
19  
20  
21  
22  
23  
24  
25  
26  
27  
28  
29  
30  
31  
32  
33  
34  
35  
36  
37  
38  
39  
40  
41  
42  
43  
44  
45  
46  
47  
48  
49  
50  
51  
52  
53  
54  
55  
56  
57  
58  
59  
60

For peer review only



1  
2  
3  
4  
5  
6  
7  
8 **187 RESULTS**

9  
10 188 There were 1 033 702 adolescents in HES admissions data in 1998-2011, of  
11 189 which 402 916 formed the study cohort (462 476 emergency admission for  
12 190 injury when considering multiple presentations from the same adolescent, 802  
13 191 682 admissions of any type [including non-emergency and non-injury, 662  
14 192 727 of which were overnight stays]) (Table 1), representing 12.4% (402 916/3  
15 193 254 046) of the adolescent population. Twice as many boys as girls had an  
16 194 emergency admission for injury during adolescence (144 158/1 588 942 girls  
17 195 in the population [8.7%]; 258 503/1 665 104 boys [16.3%]).  
18  
19  
20  
21  
22  
23  
24  
25  
26  
27  
28  
29  
30  
31  
32  
33  
34  
35  
36  
37  
38  
39  
40  
41  
42  
43  
44  
45  
46  
47  
48  
49  
50  
51  
52  
53  
54  
55  
56  
57  
58  
59  
60

196 **Table 1.** Characteristics of adolescents whose entire ten years of adolescence (ages 10-19) occurred in 1998-2011.  
197

| Characteristics | Adolescent population* | Adolescents with emergency admission(s) for injury between 10 and 19 years old, n (row %) |                       |                       |                     |
|-----------------|------------------------|-------------------------------------------------------------------------------------------|-----------------------|-----------------------|---------------------|
|                 | Total                  | Total                                                                                     | Adversity             | Accidents only        | Other causes        |
| <b>All</b>      | <b>3,254,046</b>       | <b>402,916 (100.0)</b>                                                                    | <b>141,248 (35.1)</b> | <b>233,907 (58.1)</b> | <b>27,761 (6.9)</b> |
| <b>Age**</b>    |                        |                                                                                           |                       |                       |                     |
| <b>Girls</b>    | <b>1,588,942</b>       | <b>144,158 (100.0)</b>                                                                    | <b>72,805 (50.5)</b>  | <b>59,528 (41.3)</b>  | <b>11,888 (8.2)</b> |
| 10-14 years     | .                      | 65,208 (100.0)                                                                            | 23,178 (35.5)         | 37,388 (57.3)         | 4,642 (7.1)         |
| 15-17 years     | .                      | 48,286 (100.0)                                                                            | 31,573 (65.4)         | 12,922 (26.8)         | 3,791 (7.9)         |
| 18-19 years     | .                      | 30,664 (100.0)                                                                            | 18,054 (58.9)         | 9,155 (29.9)          | 3,455 (11.3)        |
| <b>Boys</b>     | <b>1,665,104</b>       | <b>258,503 (100.0)</b>                                                                    | <b>68,403 (26.5)</b>  | <b>174,267 (67.4)</b> | <b>15,833 (6.1)</b> |
| 10-14 years     | .                      | 121,821 (100.0)                                                                           | 17,667 (14.5)         | 97,478 (80.0)         | 6,676 (5.5)         |
| 15-17 years     | .                      | 79,223 (100.0)                                                                            | 25,014 (31.6)         | 49,345 (62.3)         | 4,864 (6.1)         |
| 18-19 years     | .                      | 57,459 (100.0)                                                                            | 25,722 (44.8)         | 27,444 (47.8)         | 4,293 (7.5)         |
| Missing (Sex)   | .                      | 255 (100.0)                                                                               | 40 (15.7)             | 175 (68.6)            | 40 (15.7)           |

198 \*Based on ONS mid-year England statistics for 10 year olds in 1998-2002.[20]

199 \*\*At first emergency admission for injury

## 200 **Types of injury and age at emergency admission**

201 One-third of the cohort (141 248, 4.3% of the population) had a record of an  
202 emergency admission for adversity-related injury between 10 and 19 years  
203 old (the adversity group; 157 004 emergency admissions for adversity-related  
204 injury in total) (Table 1), with similar rates between sexes (72 805, 4.6% girls  
205 in the population; 68 403, 4.1% boys).

206 The remaining two-thirds of the cohort (261 668, 8.1% of the  
207 adolescent population) had emergency admissions for injury which were  
208 never related to adversity (Table 1). Among these adolescents, 233 907  
209 (89.4%) had an accident-related injury (the accidents only group, 7.2% of the  
210 population) and 27 761 (10.6%) had no accident-related injury (other causes  
211 group, 0.9% of the population). A high proportion of the other causes group  
212 were affected by a chronic condition<sup>1</sup> between 10 and 19 years old (11 221/27  
213 761, 40.4%), compared with the adversity group (45 321/141 248, 32.1%) or  
214 accidents only group (49 434/233 907, 21.1%).

215 Proportions of adolescents in the general population and within  
216 individual age groups by adversity [and subgroups], accidents only, and other  
217 causes groups are provided in Supplementary Table 3.

## 218 **Types of adversity-related injury**

219 Among adolescents in the adversity group (girls 72 805, boys 68 403) (Figure  
220 1), the most common type of adversity was drug or alcohol misuse (girls  
221 91.5%, boys 60.0%). A higher proportion of boys than girls were exposed to

---

<sup>1</sup> Defined by ICD-10 codes (Supplementary Table 2)

1  
2  
3  
4  
5  
6 222 violence (girls 8.5%, boys 47.6%), but a higher proportion of girls than boys  
7  
8 223 were exposed to self-harm (girls 74.6%; boys 32.9%).  
9

10 224 Girls in the adversity group were most likely to be exposed to multiple  
11  
12 225 types of adversity between 10 and 19 years old (69.2% + 2.0% + 1.2% + 0.2%  
13  
14 226 = 72.6%) (Figure 1), especially self-harm and drug or alcohol misuse (69.2%  
15  
16 227 of the entire adversity group, i.e., most of the 72.6%). Fewer boys in the  
17  
18 228 adversity group were exposed to multiple types of adversity (38.4%), the most  
19  
20 229 common combination also being self-harm and drug or alcohol misuse  
21  
22 230 (24.8%).  
23

24 231 For most of the adolescents who were exposed to multiple types of  
25  
26 232 adversity, the combination of types was recorded at the same admission. For  
27  
28 233 example, among the 130 adolescent girls who were exposed to violence and  
29  
30 234 self-harm between 10 and 19 years old (Table 2), 64.6% had both violence  
31  
32 235 and self-harm codes present simultaneously in at least one emergency  
33  
34 236 admission for injury (violence and drug or alcohol misuse 78.8%, self-harm  
35  
36 237 and drug or alcohol misuse 99.7%, violence, self-harm and drug or alcohol  
37  
38 238 misuse 33.9%; boys: violence and self-harm 40.1%, violence and drug or  
39  
40 239 alcohol misuse 84.1%, self-harm and drug or alcohol misuse 99.1%, violence,  
41  
42 240 self-harm and drug or alcohol misuse 20.0%) (data not shown).  
43  
44  
45  
46  
47  
48  
49  
50  
51  
52  
53  
54  
55  
56  
57  
58  
59  
60

**Table 2.** Proportion of adolescents with 1, 2 or 3+ emergency admission(s) for injury or 1, 2 or 3+ admission(s) of any type, by types of adversity between 10 and 19 years old\*

| Adolescent group*           | No. girls      | Girls (%)                         |             |            |                          |             |             | Boys (%)                          |             |             |                          |             |             |             |
|-----------------------------|----------------|-----------------------------------|-------------|------------|--------------------------|-------------|-------------|-----------------------------------|-------------|-------------|--------------------------|-------------|-------------|-------------|
|                             |                | Emergency admission(s) for injury |             |            | Admission(s) of any type |             |             | Emergency admission(s) for injury |             |             | Admission(s) of any type |             |             |             |
|                             |                | 1                                 | 2           | 3+         | 1                        | 2           | 3+          | No. boys                          | 1           | 2           | 3+                       | 1           | 2           | 3+          |
| <b>All</b>                  | <b>144,158</b> | <b>88.6</b>                       | <b>8.3</b>  | <b>3.1</b> | <b>57.6</b>              | <b>20.5</b> | <b>22.0</b> | <b>258,503</b>                    | <b>90.3</b> | <b>8.0</b>  | <b>1.8</b>               | <b>68.5</b> | <b>18.7</b> | <b>12.9</b> |
| <b>Adversity</b>            | <b>72,805</b>  | <b>82.7</b>                       | <b>12.0</b> | <b>5.3</b> | <b>53.8</b>              | <b>21.1</b> | <b>25.1</b> | <b>68,403</b>                     | <b>83.5</b> | <b>12.4</b> | <b>4.1</b>               | <b>64.8</b> | <b>19.4</b> | <b>15.8</b> |
| Any violence                | 6,211          | 77.2                              | 13.9        | 8.9        | 49.1                     | 20.7        | 30.1        | 32,799                            | 83.2        | 12.8        | 4.0                      | 65.6        | 19.6        | 14.8        |
| Any self-harm               | 54,315         | 79.3                              | 13.9        | 6.8        | 51.2                     | 21.5        | 27.3        | 21,087                            | 76.7        | 15.8        | 7.5                      | 57.0        | 20.7        | 22.3        |
| Any drug or alcohol misuse  | 66,645         | 81.9                              | 12.5        | 5.6        | 53.6                     | 21.1        | 25.3        | 41,014                            | 81.1        | 13.6        | 5.3                      | 62.9        | 19.5        | 17.6        |
| <b>Single adversity</b>     | <b>19,924</b>  | <b>92.8</b>                       | <b>6.2</b>  | <b>1.0</b> | <b>61.2</b>              | <b>19.8</b> | <b>19.0</b> | <b>43,563</b>                     | <b>71.3</b> | <b>8.3</b>  | <b>1.8</b>               | <b>55.8</b> | <b>15.2</b> | <b>10.3</b> |
| Violence only               | 3,734          | 92.4                              | 6.3         | 1.3        | 58.1                     | 20.4        | 21.6        | 24,912                            | 87.1        | 10.6        | 2.2                      | 68.3        | 19.2        | 12.6        |
| Self-harm only              | 2,296          | 90.3                              | 8.1         | 1.6        | 54.4                     | 20.7        | 24.9        | 2,260                             | 87.3        | 10.4        | 2.3                      | 62.3        | 19.8        | 17.9        |
| Drug or alcohol misuse only | 13,894         | 93.3                              | 5.9         | 0.8        | 63.2                     | 19.5        | 17.4        | 16,391                            | 88.5        | 9.5         | 2.1                      | 69.9        | 17.9        | 12.2        |
| <b>Multiple adversity</b>   | <b>52,881</b>  | <b>78.9</b>                       | <b>14.2</b> | <b>6.9</b> | <b>51.0</b>              | <b>21.6</b> | <b>27.4</b> | <b>24,840</b>                     | <b>77.3</b> | <b>16.7</b> | <b>7.5</b>               | <b>59.0</b> | <b>21.0</b> | <b>21.5</b> |
| V + SH                      | 130            | 70.0                              | 20.8        | 9.2        | 42.3                     | 26.2        | 31.5        | 217                               | 41.6        | 15.4        | 6.1                      | 32.8        | 16.0        | 14.2        |

1  
2  
3  
4  
5  
6  
7  
8  
9  
10  
11  
12  
13  
14  
15  
16  
17  
18  
19  
20  
21  
22  
23  
24  
25  
26  
27  
28  
29  
30  
31  
32  
33  
34  
35  
36  
37  
38  
39  
40  
41  
42  
43  
44  
45  
46  
47  
48  
49

|                       |               |             |            |            |             |             |             |                |             |            |            |             |             |             |
|-----------------------|---------------|-------------|------------|------------|-------------|-------------|-------------|----------------|-------------|------------|------------|-------------|-------------|-------------|
| V + DA                | 862           | 81.9        | 15.1       | 3.0        | 52.2        | 22.9        | 24.9        | 6,013          | 84.6        | 17.5       | 5.4        | 68.4        | 21.8        | 17.3        |
| SH + DA               | 50,404        | 80.1        | 13.7       | 6.3        | 51.8        | 21.6        | 26.6        | 16,953         | 86.7        | 16.4       | 6.9        | 64.6        | 22.7        | 22.9        |
| V + SH + DA           | 1,485         | 36.8        | 31.6       | 31.5       | 25.5        | 19.9        | 54.5        | 1,657          | 22.0        | 16.4       | 14.1       | 17.9        | 11.7        | 22.8        |
| No adversity          | 71,353        | 94.7        | 4.5        | 0.8        | 61.4        | 19.9        | 18.7        | 190,100        | 92.4        | 6.3        | 0.9        | 69.5        | 18.3        | 11.8        |
| <b>Accidents only</b> | <b>59,465</b> | <b>95.3</b> | <b>4.1</b> | <b>0.6</b> | <b>66.5</b> | <b>18.7</b> | <b>14.7</b> | <b>174,267</b> | <b>92.3</b> | <b>6.5</b> | <b>0.9</b> | <b>71.1</b> | <b>18.0</b> | <b>10.5</b> |
| <b>Other causes</b>   | <b>11,888</b> | <b>91.5</b> | <b>6.3</b> | <b>2.1</b> | <b>35.5</b> | <b>25.8</b> | <b>38.8</b> | <b>15,833</b>  | <b>93.4</b> | <b>5.0</b> | <b>1.6</b> | <b>51.5</b> | <b>22.1</b> | <b>26.3</b> |

243 V = Violence, SH = Self-harm, DA = Drug or Alcohol Misuse  
 244 \* Each adolescent classified by all adversity/accidents seen at any emergency admission(s) for injury between 10 and 19 years old.

1  
2  
3  
4  
5  
6  
7 **245 Emergency re-admissions for injury**

8  
9 246 Adolescent girls in the adversity group (50.5% of all girls in the cohort)  
10 247 accounted for 50.0% of the total number of emergency admissions for injury  
11 248 coming from girls (data not shown), compared with girls in the accidents only  
12 249 group (41.3% of all girls) who accounted for 36.6%. Boys in the adversity  
13 250 group (26.2% of all boys in the cohort) accounted for 29.1% compared with  
14 251 65.0% contributed by boys in the accidents only group (67.7% of all boys).

15 252 More adolescents in the adversity group were re-admitted for injury  
16 253 (i.e., had two or more emergency admissions for injury) between 10 and 19  
17 254 years old (girls 17.3%, boys 16.5%) (Figure 2), than in the accidents only  
18 255 group (girls 4.7%; boys 7.4%). Among adolescents admitted for injuries  
19 256 related to multiple types of adversity (Table 2), the proportion re-admitted was  
20 257 even higher (multiple types: girls 21.1%, boys 24.2%; single type: girls 7.2%,  
21 258 boys 10.1%).

22 259 Similarly, a higher proportion of adolescents in the adversity group had  
23 260 two more admissions of any type (including non-emergency and non-injury)  
24 261 between 10 and 19 years old (girls 46.2%; boys 35.2%) (Table 2) compared  
25 262 with adolescents in the accidents only group (girls 33.4%; boys 28.5%). This  
26 263 proportion was even higher for adolescents in the adversity group who were  
27 264 admitted with multiple types of adversity (multiple types: girls 49.0%, boys  
28 265 42.5%; single type: girls 38.8%, boys 25.5%).  
29  
30  
31  
32  
33  
34  
35  
36  
37  
38  
39  
40  
41  
42  
43  
44  
45  
46  
47  
48  
49  
50  
51  
52  
53  
54  
55  
56  
57  
58  
59  
60

1  
2  
3  
4  
5  
6 266 **DISCUSSION**

7  
8 267 More than one in 20 adolescents in England had at least one emergency  
9  
10 268 admission for adversity-related injury between 10 and 19 years old. These  
11  
12 269 adolescents accounted for a third of all adolescents with emergency  
13  
14 270 admissions for injury and for a disproportionate number of re-admissions for  
15  
16 271 injury, particularly adolescents admitted with multiple types of adversity-  
17  
18 272 related injury. Targeting adolescents admitted with adversity-related injury  
19  
20 273 could reduce their risk of future harm, the rate of re-admissions to hospital,  
21  
22 274 and health care costs .[25]

23  
24 275 Longitudinally-linked admissions allowed us to study the entire ten  
25  
26 276 years of adolescence in 402 916 individuals. We were able to distinguish  
27  
28 277 between types of adversity that co-occurred during adolescence or at the  
29  
30 278 same admission, and to study re-admissions. One weakness of this study  
31  
32 279 was our reliance on diagnostic codes recorded in administrative data.  
33  
34 280 Violence by carers, which could be coded under maltreatment, and drug or  
35  
36 281 alcohol misuse have been shown to be under-recorded using ICD-10,[26 27]  
37  
38 282 but false positives are rare.[15] To address under-recording, we used what  
39  
40 283 we considered to be sensitive clusters of codes for adversity. Other factors  
41  
42 284 related to recording or coding practices,[12 14 15 27 28] for example, new  
43  
44 285 guidelines for defining maltreatment,[14] can also affect ascertainment.  
45  
46 286 Because of the relative insensitivity but good specificity of the coding clusters,  
47  
48 287 some adolescents who were classified in the accidents only group may in fact  
49  
50 288 belong to the adversity group, but did not have their adversity recognised or  
51  
52 289 recorded. Consequently, our prevalence estimates of admission for different  
53  
54 290 types of adversity-related injury are likely to provide a lower bound for the true



1  
2  
3  
4  
5  
6 291 prevalence. Further, as adolescents exposed to adversity who attended the  
7  
8 292 accident and emergency (A&E) department were not necessarily admitted,  
9  
10 293 our prevalence estimates represent adolescents at the severe end of the  
11  
12 294 adversity spectrum. Such analyses of A&E data are limited by the quality of  
13  
14 295 these data in England (available since 2007) and the resulting problems with  
15  
16 296 identifying reasons for presentation and accurately linking individuals to long-  
17  
18 297 term outcomes.[29]

19  
20 298 Our prevalence estimates of admission for injury related to individual  
21  
22 299 types of adversity from the general adolescent population are consistent with  
23  
24 300 previous reports for emergency admissions for assault-related injury in 2004-  
25  
26 301 2009 and for all admissions (emergency and non-emergency) for self-harm  
27  
28 302 and drug or alcohol misuse.[1 2 24 30] Previous studies have reported higher  
29  
30 303 rates of drug or alcohol misuse in boys than in girls in the general adolescent  
31  
32 304 population.[24] We found higher rates in girls. This difference could indicate  
33  
34 305 that girls exposed to drug or alcohol misuse are more likely to be injured, to  
35  
36 306 present to hospital, or to be admitted after a hospital presentation, than boys.

37  
38 307 Our estimated rates of re-admission of any type (including non-  
39  
40 308 emergency and non-injury) for violence (girls 50.8%, boys 34.4%) (Table 2)  
41  
42 309 and self-harm (girls 48.8%, boys 43.0%) were higher than previously reported  
43  
44 310 (11% for violence, 33% for self-harm).[3 4] These discrepancies are likely to  
45  
46 311 be because we considered the whole ten years of adolescence and re-  
47  
48 312 admission of any type, whereas previous studies looked at re-attendance up  
49  
50 313 to the following year and for the same type of adversity-related injury.[3 4]

51  
52 314 The results of this study should inform policy initiatives and national  
53  
54 315 guidelines. Firstly, a substantial proportion of adolescents are affected by

1  
2  
3  
4  
5  
6 316 adversity and they account for a large proportion (29.1 to 50.0%) of all  
7  
8 317 emergency admissions to hospital for injury in this age group. Secondly, we  
9  
10 318 show the large burden of injury admission for all three types of adversity, yet  
11  
12 319 there are currently no national clinical guidelines for managing cases of  
13  
14 320 violence, other than responding to violence by caregivers.[31] Finally, these  
15  
16 321 results show that adolescents often present with multiple types of adversity  
17  
18 322 (especially in girls), even though guidelines exist only for managing individual  
19  
20 323 problems.[32-34]

21  
22 324 In addition, policy makers need to be aware of the widely varying  
23  
24 325 aetiological pathways to admission with adversity-related injury. Our  
25  
26 326 approach to defining this group of adolescents is not designed to reflect the  
27  
28 327 complexity or severity of these cases. For example, admission for multiple  
29  
30 328 types of adversity-related injury is a poor proxy indicator of severity. Effective  
31  
32 329 interventions will need to be tailored to the individual based on specialist  
33  
34 330 clinical assessment. However, all three types of adversity are likely to reflect  
35  
36 331 a combination of underlying psychosocial need and environmental and social  
37  
38 332 stressors.[35]

39  
40 333 Hospital interventions may reduce the risk of future harm, including the  
41  
42 334 incidence of other types of harm not seen in hospital, e.g., further adversity-  
43  
44 335 related injury not leading to admission. Further research using linked data  
45  
46 336 from health care sectors such as accident and emergency, could shed light on  
47  
48 337 the overall burden of adversity-related injury on hospitals. Though these data  
49  
50 338 have limited quality in England. Such analyses are limited by the quality of  
51  
52 339 accident and emergency data in England (available since 2007) and the  
53  
54 340 resulting problems with identifying reasons for presentation and accurately

1  
2  
3  
4  
5  
6  
7  
8  
9  
10  
11  
12  
13  
14  
15  
16  
17  
18  
19  
20  
21  
22  
23  
24  
25  
26  
27  
28  
29  
30  
31  
32  
33  
34  
35  
36  
37  
38  
39  
40  
41  
42  
43  
44  
45  
46  
47  
48  
49  
50  
51  
52  
53  
54  
55  
56  
57  
58  
59  
60

341 | ~~linking individuals to long term outcomes.[29]~~ However, longitudinally-linked  
342 datasets in other countries could provide insights into long-term outcomes for  
343 this vulnerable group of adolescents.

For peer review only

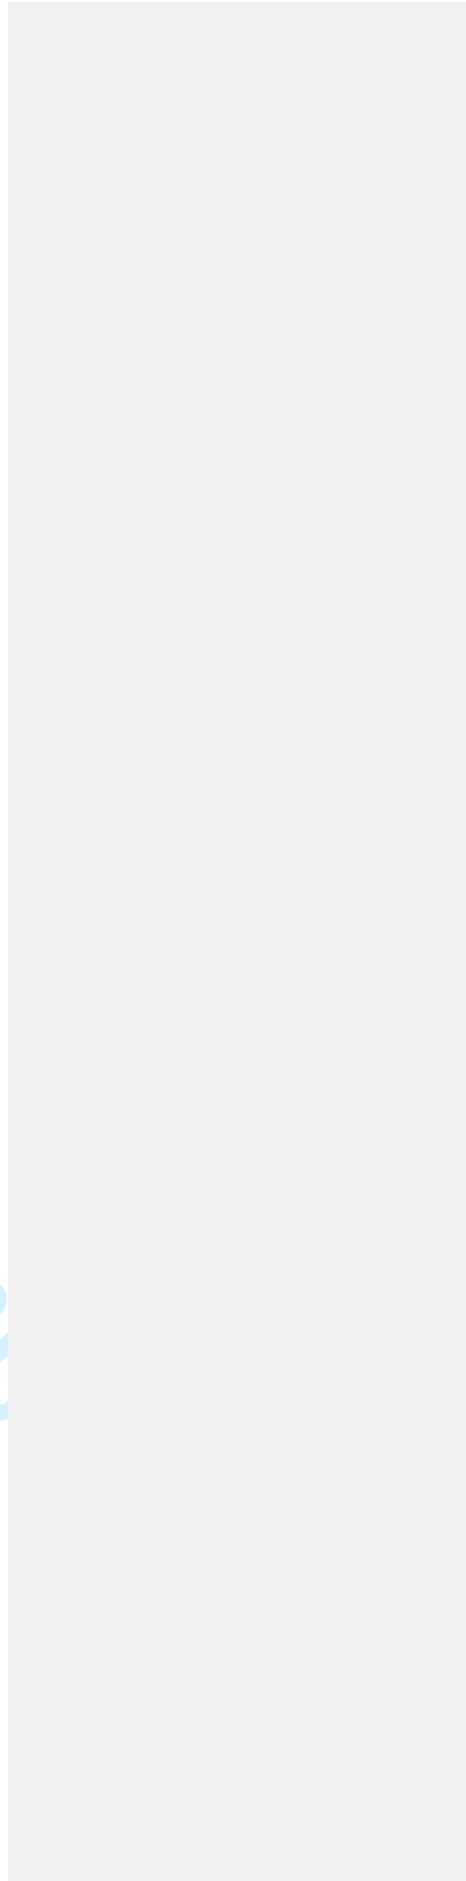

1  
2  
3  
4  
5  
6  
7  
8 344 **Contributors**

9  
10 345 Annie Herbert – helped to conceive and design the study, analysed and  
11  
12 346 interpreted the data, drafted the article, revised it critically for important  
13  
14 347 intellectual content and approved the final version to be published.

15  
16 348 Leah Li – helped to conceive and design the study, interpreted the data,  
17  
18 349 revised the article critically for important intellectual content and approved the  
19  
20 350 final version to be published.

21  
22 351 Arturo González-Izquierdo – helped to conceive and design the study,  
23  
24 352 acquired and interpreted the data, revised the article critically for important  
25  
26 353 intellectual content and approved the final version to be published.

27  
28 354 Ruth Gilbert – helped to conceive and design the study, acquired and  
29  
30 355 interpreted the data, revised the article critically for important intellectual  
31  
32 356 content and approved the final version to be published.

33  
34 357  
35 358 **Competing interests** None.

36  
37 359

38  
39 360 **Funding** AH was supported by the Policy Research Unit in the Health of  
40  
41 361 Children, Young People and Families, which is funded by the Department of  
42  
43 362 Health Policy Research Programme (grant reference number: 109/0001).

44  
45 363 This report is an independent research commissioned by the Department of

46  
47 364 Health. The views expressed in this publication are those of the authors and

48  
49 365 not necessarily those of the Department of Health. AH is also supported by

50  
51 366 the University College London IMPACT studentship. RG is supported by

52  
53 367 awards establishing the Farr Institute of Health Informatics Research at

54  
55 368 University College London Partners from the Medical Research Council and a

1  
2  
3  
4  
5  
6 369 consortium of funders (MR/K006584/1). The study funders played no part in  
7  
8 370 the design, data analysis and interpretation of this study; the writing of the  
9  
10 371 manuscript or the decision to submit the paper for publication, and the  
11  
12 372 authors' work was independent of their funders.

13  
14 373

15  
16 374 **Ethics** Both Hospital Episode Statistics (HES) admissions data and Office for  
17  
18 375 National Statistics (ONS) mid-year population estimates are derived from  
19  
20 376 routinely collected administrative data. HES data were pseudonymised  
21  
22 377 before we received them and therefore we did not require Research Ethics  
23  
24 378 Committee approval.

25  
26 379

27  
28 380 **Data sharing** No additional data on HES are available. ONS mid-year  
29  
30 381 population estimates may be accessed freely online:

31  
32 382 [http://www.ons.gov.uk/ons/publications/all-](http://www.ons.gov.uk/ons/publications/all-releases.html?definition=tcm%3A77-22371)  
33  
34 383 [releases.html?definition=tcm%3A77-22371](http://www.ons.gov.uk/ons/publications/all-releases.html?definition=tcm%3A77-22371).

## 384 REFERENCES

- 385 1. Bellis MA, Hughes K, Wood S, et al. National five-year examination  
386 of inequalities and trends in emergency hospital admission for  
387 violence across England. *Injury prevention : journal of the*  
388 *International Society for Child and Adolescent Injury*  
389 *Prevention* 2011;**17**(5):319-25 doi:  
390 10.1136/ip.2010.030486[published Online First: Epub Date]].
- 391 2. Hawton K, Rodham K, Evans E, et al. Deliberate self harm in  
392 adolescents: self report survey in schools in England. *Bmj*  
393 2002;**325**(7374):1207-11
- 394 3. Meuleners LB, Lee AH, Hendrie D. Interpersonal violence  
395 hospitalisations for adolescents: A population-based study.  
396 *Journal of paediatrics and child health* 2010;**46**(11):686-90  
397 doi: 10.1111/j.1440-1754.2010.01818.x[published Online  
398 First: Epub Date]].
- 399 4. Lilley R, Owens D, Horrocks J, et al. Hospital care and repetition  
400 following self-harm: multicentre comparison of self-poisoning  
401 and self-injury. *The British Journal of Psychiatry*  
402 2008;**192**(6):440-45
- 403 5. Snider C, Lee J. Youth violence secondary prevention initiatives in  
404 emergency departments: a systematic review. *Cjem*  
405 2009;**11**(2):161-8
- 406 6. Ougrin D, Boege I, Stahl D, et al. Randomised controlled trial of  
407 therapeutic assessment versus usual assessment in adolescents  
408 with self-harm: 2-year follow-up. *Archives of disease in*  
409 *childhood* 2013;**98**(10):772-6 doi: 10.1136/archdischild-2012-  
410 303200[published Online First: Epub Date]].
- 411 7. Crawford MJ, Patton R, Touquet R, et al. Screening and referral for  
412 brief intervention of alcohol-misusing patients in an emergency  
413 department: a pragmatic randomised controlled trial. *The*  
414 *Lancet*; **364**(9442):1334-39 doi:  
415 [http://dx.doi.org/10.1016/S0140-6736\(04\)17190-](http://dx.doi.org/10.1016/S0140-6736(04)17190-0)  
416 [0](http://dx.doi.org/10.1016/S0140-6736(04)17190-0)[published Online First: Epub Date]].
- 417 8. Johnson SB, Bradshaw CP, Wright JL, et al. Characterizing the  
418 teachable moment: is an emergency department visit a  
419 teachable moment for intervention among assault-injured  
420 youth and their parents? *Pediatric emergency care*  
421 2007;**23**(8):553-59
- 422 9. Inpatient HES Data Dictionary. Leeds: Health and Social Care  
423 Information Centre, 2010.

Formatted: Font: Cambria, 14 pt, French (France), Do not check spelling or grammar

- 1  
2  
3  
4  
5  
6 424 10. World Health Organisation. Adolescent Health. Secondary  
7 425 Adolescent Health 2013.  
8  
9 426 [http://www.who.int/topics/adolescent\\_health/en/](http://www.who.int/topics/adolescent_health/en/).
- 10 427 11. National Health Service Act, 2006.
- 11 428 12. Gonzalez-Izquierdo A, Woodman J, Copley L, et al. Variation in  
12 429 recording of child maltreatment in administrative records of  
13 430 hospital admissions for injury in England, 1997-2009. Archives  
14 431 of disease in childhood 2010;**95**(11):918-25 doi:  
15 432 10.1136/adc.2009.180216[published Online First: Epub Date]].
- 16 433 13. International Statistical Classification of Diseases and Related  
17 434 Health Problems 10th Revision. Secondary International  
18 435 Statistical Classification of Diseases and Related Health  
19 436 Problems 10th Revision.  
20 437 <http://apps.who.int/classifications/icd10/browse/2010/en>.
- 21 438 14. Saperia J, Lakhanpaul M, Kemp A, et al. When to suspect child  
22 439 maltreatment: summary of NICE guidance. Bmj  
23 440 2009;**339**:b2689 doi: 10.1136/bmj.b2689[published Online  
24 441 First: Epub Date]].
- 25 442 15. Gonzalez-Izquierdo A, Ward A, M OD, et al. Cross-country  
26 443 comparison of victimisation-related injury admission in  
27 444 children and adolescents in England and Western Australia.  
28 445 BMC Health Serv Res 2013;**13**(1):260 doi: 10.1186/1472-  
29 446 6963-13-260[published Online First: Epub Date]].
- 30 447 16. Patton GC, Viner R. Pubertal transitions in health. Lancet  
31 448 2007;**369**(9567):1130-9 doi: 10.1016/S0140-6736(07)60366-  
32 449 3[published Online First: Epub Date]].
- 33 450 17. Gill T. How old are GCSE candidates? Statistics Report Series,  
34 451 2010.
- 35 452 18. Directgov. AS and A levels. Secondary AS and A levels 2012.  
36 453 <http://webarchive.nationalarchives.gov.uk/20121015000000/>  
37 454 [http://www.direct.gov.uk/en/EducationAndLearning/Qualific](http://www.direct.gov.uk/en/EducationAndLearning/QualificationsExplained/DG_10039018)  
38 455 [ationsExplained/DG\\_10039018](http://www.direct.gov.uk/en/EducationAndLearning/QualificationsExplained/DG_10039018).
- 39 456 19. Buying Alcohol. Secondary Buying Alcohol 2013.  
40 457 [https://www.drinkaware.co.uk/check-the-facts/alcohol-and-](https://www.drinkaware.co.uk/check-the-facts/alcohol-and-the-law/buying-alcohol)  
41 458 [the-law/buying-alcohol](https://www.drinkaware.co.uk/check-the-facts/alcohol-and-the-law/buying-alcohol).
- 42 459 20. All releases of Population Estimates for UK, England and Wales,  
43 460 Scotland and Northern Ireland: Office for National Statistics,  
44 461 2013.
- 45 462 21. Office for National Statistics. Mid-year population estimates short  
46 463 methods guide: Office for National Statistics, 2010.
- 47 464 22. Radford L. Child abuse and neglect in the UK today. NSPCC  
48 465 Research: NSPCC, 2011.

- 1  
2  
3  
4  
5  
6 466 23. *Truth hurts: report of the national inquiry into self-harm among*  
7 467 *young people*. London: Mental Health Foundation, 2006.  
8  
9 468 24. Hibell B, Guttormsson U, Ahlström S, et al. The 2011 ESPAD  
10 469 Report. Substance use among students in 2012;**36**  
11 470 25. National Audit Office. Emergency admissions to hospital:  
12 471 managing the demand, 2013.  
13 472 | 26. Scott D, Tonmyr L, Fraser J, et al. The utility and challenges of  
14 473 using ICD codes in child maltreatment research: A review of  
15 474 existing literature. *Child abuse & neglect* 2009;**33**(11):791-808  
16 475 doi: S0145-2134(09)00202-6 [pii]  
17 476 10.1016/j.chiabu.2009.08.005[published Online First: Epub Date]].  
18 477 | 27. McKenzie K, Harrison JE, McClure RJ. Identification of alcohol  
19 478 involvement in injury-related hospitalisations using routine  
20 479 data compared to medical record review. *Australian and New*  
21 480 *Zealand journal of public health* 2010;**34**(2):146-52 doi:  
22 481 10.1111/j.1753-6405.2010.00499.x[published Online First:  
23 482 Epub Date]].  
24 483 28. Farrar S, Yi D, Sutton M, et al. Has payment by results affected the  
25 484 way that English hospitals provide care? Difference-in-  
26 485 differences analysis. *Bmj* 2009;**339** doi:  
27 486 10.1136/bmj.b3047[published Online First: Epub Date]].  
28 487 29. Hospital Episode Statistics Accident & Emergency (England),  
29 488 2007-. Secondary Hospital Episode Statistics Accident &  
30 489 Emergency (England), 2007-.  
31 490 <http://adn.ac.uk/catalogue/cataloguepage?sn=888040>.  
32 491 30. Hawton K, Rodham K, Evans E, et al. Adolescents Who Self Harm:  
33 492 A Comparison of Those Who Go to Hospital and Those Who Do  
34 493 Not. *Child Adol Ment H-Uk* 2009;**14**(1):24-30 doi: DOI  
35 494 10.1111/j.1475-3588.2008.00485.x[published Online First:  
36 495 Epub Date]].  
37 496 31. What to do if you're worried that a child is being abused. In: Skills  
38 497 DfE, ed.: DfES Publications, 2006.  
39 498 32. *Self-harm. The short term physical and psychological management*  
40 499 *and secondary prevention of self-harm in primary and secondary*  
41 500 *care*. London: National Institute for Health and Clinical  
42 501 Excellence, 2011.  
43 502 33. *Drug misuse: Psychosocial interventions*. London: National  
44 503 Institute for Health and Clinical Excellence, 2007.  
45 504 34. Alcohol-use disorder : diagnosis, assessment and management of  
46 505 harmful drinking and alcohol dependence. London: National  
47 506 Institute for Health and Care Excellence, 2011.

Formatted: Font: Cambria, 14 pt, French (France), Do not check spelling or grammar

Formatted: Font: Cambria, 14 pt, French (France), Do not check spelling or grammar



1  
2  
3  
4  
5  
6  
7  
8  
9  
10  
11  
12  
13  
14  
15  
16  
17  
18  
19  
20  
21  
22  
23  
24  
25  
26  
27  
28  
29  
30  
31  
32  
33  
34  
35  
36  
37  
38  
39  
40  
41  
42  
43  
44  
45  
46  
47  
48  
49  
50  
51  
52  
53  
54  
55  
56  
57  
58  
59  
60

507 35. Viner RM, Ozer EM, Denny S, et al. Adolescence and the social  
508 determinants of health. *Lancet* 2012;**379**(9826):1641-52 doi:  
509 10.1016/S0140-6736(12)60149-4[published Online First:  
510 Epub Date]].  
511

For peer review only

1  
2  
3  
4  
5  
6  
7  
8  
9  
10  
11  
12  
13  
14  
15  
16  
17  
18  
19  
20  
21  
22  
23  
24  
25  
26  
27  
28  
29  
30  
31  
32  
33  
34  
35  
36  
37  
38  
39  
40  
41  
42  
43  
44  
45  
46  
47  
48  
49  
50  
51  
52  
53  
54  
55  
56  
57  
58  
59  
60

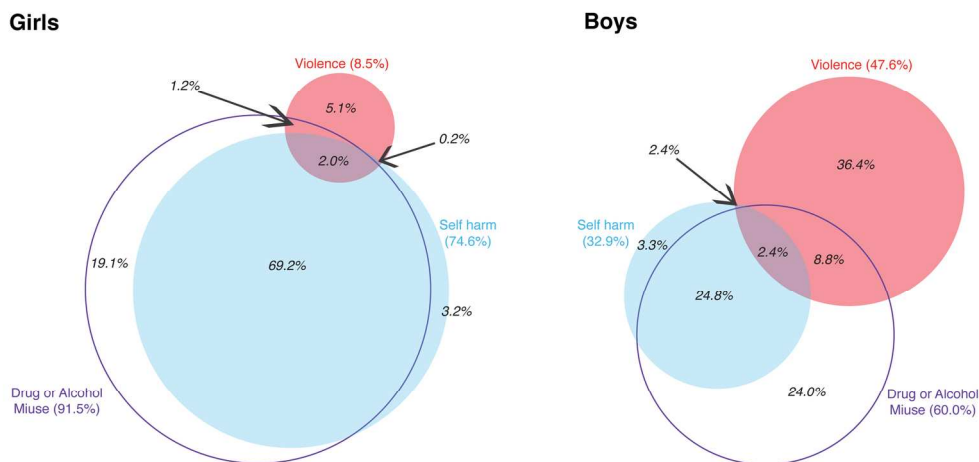

Number (%) of adolescents with adversity-related injury, by types of adversity between 10 and 19 years old\* and sex

\*Each adolescent classified by all adversity recorded at any emergency admission(s) for injury between 10 and 19 years old  
173x86mm (300 x 300 DPI)

Review only

1  
2  
3  
4  
5  
6  
7  
8  
9  
10  
11  
12  
13  
14  
15  
16  
17  
18  
19  
20  
21  
22  
23  
24  
25  
26  
27  
28  
29  
30  
31  
32  
33  
34  
35  
36  
37  
38  
39  
40  
41  
42  
43  
44  
45  
46  
47  
48  
49  
50  
51  
52  
53  
54  
55  
56  
57  
58  
59  
60

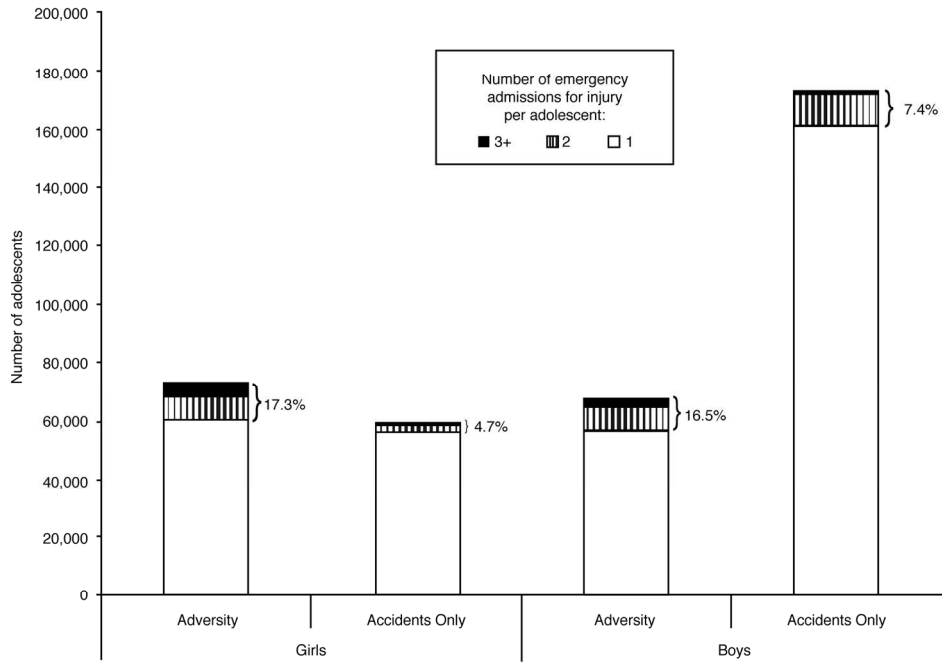

Number of adolescents with 1, 2 and 3 or more emergency admission(s) for injury between 10 and 19 years old\*, by types of injury between 10 and 19 years old\*\* and sex

\*Percentages are of adolescents who have 2 or more emergency admissions for injury between 10 and 19 years old

\*\*Each adolescent was classified by all adversity/accidents recorded at any emergency admission(s) for injury  
173x125mm (300 x 300 DPI)

only

Supplementary Tables

**Supplementary Table 1.** Cohort (shaded) who have at least one emergency admission for injury between 10 and 19 years old in 1998-2011 (N = 402,916)

| 1998 | 1999 | 2000 | 2001 | 2002 | ... | 2007 | 2008 | 2009 | 2010 | 2011 |
|------|------|------|------|------|-----|------|------|------|------|------|
| 6    | 7    | 8    | 9    | 10   | ... | 15   | 16   | 17   | 18   | 19   |
| 7    | 8    | 9    | 10   | 11   | ... | 16   | 17   | 18   | 19   | 20   |
| 8    | 9    | 10   | 11   | 12   | ... | 17   | 18   | 19   | 20   | 21   |
| 9    | 10   | 11   | 12   | 13   | ... | 18   | 19   | 20   | 21   | 22   |
| 10   | 11   | 12   | 13   | 14   | ... | 19   | 20   | 21   | 22   | 23   |

**Supplementary Table 2.** Definitions and International Classification of Diseases (ICD-10) diagnostic codes used to classify emergency admissions for injury, chronic conditions and types of adversity\*

---

### ADMISSIONS AND ADMISSION TYPES

---

#### Admission

Admissions were defined by linked episodes of inpatient care, including day cases (any case > 4 hours stay). Any admission which occurred within one day or was a hospital transfer from a previous admission was considered to be the same admission. An episode may have up to 20 diagnosis codes entered, but 88% of admissions in this cohort had episodes with four or less diagnoses recorded (data not shown).

#### Emergency (acute; unplanned) admission

An admission was considered to be an emergency if the method of admission variable ('admimeth') was 21-24 or 28.(1)

#### Injury

An admission was considered to be for injury if any of the diagnosis codes in the first episode of the admission were S or T codes (Chapter XIX of the ICD -10).

---

### CHRONIC CONDITIONS

---

ICD-10 codes as per Hardelid et al, 2013,(2) excluding E24.4, F10-F19, G31.2, G40.5, G62.1, G72.1, K29.2, K70, K85.2, K86.0, O35.4, R78.1-R78.5, Z50.2, Z50.3, Z86.4, X64-X84, Y10-Y34, Z91.5, F30.0-F30.2, F30.8-F32.3, F32.8-F334, F33.8-F34.1, F34.8-F34.9, F38.0-F38.1, F38.8, F39-F40.2, F40.8- F41.3, F41.8-F41.9.

---

### ADVERSITY CLUSTERS AND DESCRIPTIONS\*

### ICD-10 CODES

---

#### Violence

##### *Maltreatment*

Maltreatment syndromes

T74

Effects of other deprivation (extreme neglect)

T73

Perpetrator of neglect and other maltreatment syndromes

Y06, Y07

##### *Assault*

Assault by bodily force and sexual assault

Y04, Y05

Other types of assault

X85 - Y03, Y08 - Y09

##### *Undetermined cause*

Events of undetermined intent

Y20 - Y34

Examination and observation following other inflicted injury

Z04.5

Examination and observation for other reasons: request

Z04.8

for expert evidence

#### Self-harm

##### *Intentional self-poisoning by and exposure to...*

...drugs

X60-X63

...other and unspecified drugs, medicaments and

X64

biological substances

...alcohol

X65

...organic solvents and halogenated hydrocarbons and

X66

their vapours

...other gases and vapours

X67

...pesticides

X68

...other and unspecified chemicals and noxious

X69

|    |                                                                     |                       |
|----|---------------------------------------------------------------------|-----------------------|
| 1  |                                                                     |                       |
| 2  |                                                                     |                       |
| 3  | substances                                                          |                       |
| 4  | <i>Intentional self-harm by...</i>                                  |                       |
| 5  | ...hanging, strangulation and suffocation                           | X70                   |
| 6  | ...drowning and submersion                                          | X71                   |
| 7  | ...firearm discharge                                                | X72-X74               |
| 8  | ...explosive material                                               | X75                   |
| 9  | ...smoke, fire and flames, or steam, hot vapours and hot            |                       |
| 10 | objects                                                             | X76-X77               |
| 11 | ...sharp/blunt objects                                              | X78-X79               |
| 12 | ...jumping from a high place                                        | X80                   |
| 13 | ...jumping or lying before a moving object, or crashing a           |                       |
| 14 | motor vehicle                                                       | X81-82                |
| 15 | ...other specified means                                            | X83                   |
| 16 | ...unspecified means                                                | X84                   |
| 17 | <i>Personal history of self-harm</i>                                | Z91.5                 |
| 18 |                                                                     |                       |
| 19 |                                                                     |                       |
| 20 |                                                                     |                       |
| 21 | <b>Drug or alcohol misuse</b>                                       |                       |
| 22 | <i>Drugs, medicaments and biological substances (illicit drugs)</i> |                       |
| 23 | Mental and behavioural disorders due to psychoactive                |                       |
| 24 | substance use                                                       | F11 - F17, F19        |
| 25 | Finding of drugs not normally found in blood                        | R78.1 - R78.5         |
| 26 | Poisoning by drugs, medicaments and biological                      | T36 - T50             |
| 27 | substances                                                          | (not including T50.6) |
| 28 | Poisoning, undetermined intent                                      | Y10 - Y14             |
| 29 | Drug rehabilitation                                                 | Z50.3                 |
| 30 | Drug abuse counselling and surveillance                             | Z71.5                 |
| 31 | Drug use                                                            | Z72.2                 |
| 32 | <i>Environmental/ Domestic substances</i>                           |                       |
| 33 | Mental and behavioural disorders due to use of volatile             |                       |
| 34 | solvents                                                            | F18                   |
| 35 | Accidental poisoning by and exposure to noxious                     |                       |
| 36 | substances                                                          | X40 - X44, X46 - X49  |
| 37 | Intentional self-poisoning by and exposure to noxious               |                       |
| 38 | substances                                                          | X69                   |
| 39 | Poisoning by chemical or noxious substance,                         |                       |
| 40 | undetermined intent                                                 | Y16 - Y19             |
| 41 | <i>Codes mentioning both alcohol and drugs</i>                      |                       |
| 42 | Special epileptic syndromes - (related to alcohol, drugs,           |                       |
| 43 | etc.)                                                               | G40.5                 |
| 44 | Blood-alcohol and blood-drug test                                   | Z04.0                 |
| 45 | <i>Alcohol</i>                                                      |                       |
| 46 | Alcohol-induced pseudo-Cushing's syndrome                           | E24.4                 |
| 47 | Mental and behavioural disorders due to use of alcohol              | F10                   |
| 48 | Degeneration of nervous system due to alcohol                       | G31.2                 |
| 49 | Alcoholic polyneuropathy                                            | G62.1                 |
| 50 | Alcoholic myopathy                                                  | G72.1                 |
| 51 | Alcoholic cardiomyopathy                                            | I42.1                 |
| 52 | Alcoholic gastritis                                                 | K29.2                 |
| 53 | Alcoholic liver disease                                             | K70                   |
| 54 | Alcohol-induced acute pancreatitis                                  | K85.2                 |
| 55 |                                                                     |                       |
| 56 |                                                                     |                       |
| 57 |                                                                     |                       |
| 58 |                                                                     |                       |
| 59 |                                                                     |                       |
| 60 |                                                                     |                       |

|    |                                                          |           |
|----|----------------------------------------------------------|-----------|
| 1  |                                                          |           |
| 2  |                                                          |           |
| 3  | Alcohol-induced chronic pancreatitis                     | K86.0     |
| 4  | Maternal care for (suspected) damage to fetus from       |           |
| 5  | alcohol                                                  | O35.4     |
| 6  |                                                          |           |
| 7  |                                                          |           |
| 8  | Finding of alcohol in blood                              | R78.0     |
| 9  | Poisoning: antidotes and chelating agents, not elsewhere |           |
| 10 | classified                                               | T50.6     |
| 11 | Toxic effect of alcohol                                  | T51       |
| 12 | Accidental poisoning by exposure to alcohol              | X45       |
| 13 |                                                          |           |
| 14 |                                                          |           |
| 15 | Poisoning by exposure to alcohol, undetermined intent    | Y15       |
| 16 | Evidence of alcohol involvement determined by blood      |           |
| 17 | alcohol level                                            | Y90       |
| 18 | Evidence of alcohol involvement determined by level of   |           |
| 19 | intoxication                                             | Y91       |
| 20 | Alcohol rehabilitation                                   | Z50.2     |
| 21 | Alcohol abuse counselling and surveillance               | Z71.4     |
| 22 | Alcohol use                                              | Z72.1     |
| 23 |                                                          |           |
| 24 |                                                          |           |
| 25 | <b>Accidents</b>                                         |           |
| 26 | Transport accidents                                      | V01 - V99 |
| 27 | Falls                                                    | W00 - W19 |
| 28 | Exposure to inanimate mechanical forces                  | W20 - W49 |
| 29 | Exposure to animate mechanical forces                    | W50 - W64 |
| 30 | Accidental drowning and submersion                       | W65 - W74 |
| 31 | Other accidental threats to breathing                    | W75 - W84 |
| 32 | Exposure to electric current, radiation and extreme      |           |
| 33 | ambient air temperature and pressure                     | W85 - W99 |
| 34 | Exposure to smoke, fire and flames                       | X00 - X09 |
| 35 | Contact with heat and hot substances                     | X10 - X19 |
| 36 | Contact with venomous animals and plants                 | X20 - X29 |
| 37 | Exposure to forces of nature                             | X30 - X39 |
| 38 | Accidental poisoning by and exposure to noxious          |           |
| 39 | substances                                               | X40 - X49 |
| 40 | Overexertion, travel and privation                       | X50 - X57 |
| 41 | Accidental exposure to other and unspecified factors     | X58 - X59 |
| 42 |                                                          |           |
| 43 |                                                          |           |
| 44 |                                                          |           |
| 45 |                                                          |           |
| 46 |                                                          |           |
| 47 |                                                          |           |
| 48 |                                                          |           |
| 49 |                                                          |           |
| 50 |                                                          |           |
| 51 |                                                          |           |
| 52 |                                                          |           |
| 53 |                                                          |           |
| 54 |                                                          |           |
| 55 |                                                          |           |
| 56 |                                                          |           |
| 57 |                                                          |           |
| 58 |                                                          |           |
| 59 |                                                          |           |
| 60 |                                                          |           |

**Supplementary Table 3.** Population prevalence\* (per 100,000) of emergency admission(s) for injury, by types of adversity within age periods\*\* and sex

|                             | <b>All girls</b> | <b>All boys</b> | <b>Girls</b>  |               |               | <b>Boys</b>   |                |                |
|-----------------------------|------------------|-----------------|---------------|---------------|---------------|---------------|----------------|----------------|
| <b>Adolescent group**</b>   | <b>10-19y</b>    | <b>10-19y</b>   | <b>10-14y</b> | <b>15-17y</b> | <b>18-19y</b> | <b>10-14y</b> | <b>15-17y</b>  | <b>18-19y</b>  |
| All                         | 9,073            | 16,333‡         | 4,104         | 3,260§        | 2,189§        | 7,316‡        | 5,069‡§        | 3,852‡§        |
| <b>Adversity</b>            | <b>4,582</b>     | <b>4,108‡</b>   | <b>1,240</b>  | <b>2,124§</b> | <b>1,329§</b> | <b>669‡</b>   | <b>1,458‡§</b> | <b>1,748‡§</b> |
| Any violence                | 391              | 1,970‡          | 103           | 152§          | 110           | 277‡          | 731‡§          | 833‡§          |
| Any self-harm               | 3,418            | 1,266‡          | 777           | 1,463§        | 923§          | 170‡          | 393‡§          | 478‡§          |
| Any drug or alcohol misuse  | 4,194            | 2,463‡          | 1,112         | 1,959§        | 1,221§        | 375‡          | 807‡§          | 1,077‡§        |
| <b>Single adversity</b>     | <b>1,254</b>     | <b>2616‡</b>    | <b>495</b>    | <b>687§</b>   | <b>412§</b>   | <b>516</b>    | <b>991‡§</b>   | <b>1,114‡§</b> |
| Violence only               | 235              | 1,496‡          | 77            | 99§           | 75            | 256‡          | 609‡§          | 635‡§          |
| Self-harm only              | 144              | 136             | 48            | 63§           | 31§           | 37‡           | 39             | 34             |
| Drug or alcohol misuse only | 874              | 984‡            | 369           | 525§          | 305§          | 224‡          | 342‡§          | 445‡§          |
| <b>Multiple adversity</b>   | <b>3,328</b>     | <b>1,492‡</b>   | <b>745</b>    | <b>1,436§</b> | <b>917§</b>   | <b>153‡</b>   | <b>467‡§</b>   | <b>634‡§</b>   |
| V+SH                        | 8                | 13‡             | 3             | 3             | 1§            | 1‡            | 2              | 2              |
| V+DA                        | 54               | 361‡            | 17            | 37§           | 26§           | 19            | 114‡§          | 190‡§          |
| SH+DA                       | 3,172            | 1,018‡          | 720           | 1,384§        | 882§          | 131‡          | 345‡§          | 436‡§          |
| V+SH+DA                     | 93               | 100‡            | 6             | 13§           | 8             | 2‡            | 5‡§            | 6§             |
| No adversity                | 4,491            | 11,417‡         | 2,676         | 1,136§        | 860§          | 6,648‡        | 3,611‡         | 2,171‡§        |
| <b>Accidents only</b>       | <b>748</b>       | <b>10,466‡</b>  | <b>2,221</b>  | <b>804§</b>   | <b>580§</b>   | <b>5,887‡</b> | <b>3,109‡</b>  | <b>1,784‡§</b> |
| <b>Other causes</b>         | <b>3,742</b>     | <b>951‡</b>     | <b>455</b>    | <b>332§</b>   | <b>279§</b>   | <b>761‡</b>   | <b>503‡</b>    | <b>388‡§</b>   |



1  
2  
3  
4  
5  
6  
7  
8  
9  
10  
11  
12  
13  
14  
15  
16  
17  
18  
19  
20  
21  
22  
23  
24  
25  
26  
27  
28  
29  
30  
31  
32  
33  
34  
35  
36  
37  
38  
39  
40  
41  
42  
43  
44  
45  
46  
47  
48  
49

V = Violence, SH = Self-harm, DA = Drug or Alcohol Misuse

\*Due to large denominators, confidence intervals for population prevalence were too narrow to provide any meaningful interpretation and so are not shown.

\*\*Each adolescent classified by all adversity/accidents seen at any emergency injury admission(s) at 10-19 years, 10-14 years, 15-17 years and 18-19 years, respectively.

‡Statistically significantly different from girls of the same age (according to 95% confidence intervals).

§Statistically significantly different from 10-14 year olds of the same sex (according to 95% confidence intervals).

peer review only

**REFERENCES**

1. Inpatient HES Data Dictionary. Leeds: Health and Social Care Information Centre, 2010.
2. Hardelid P DN, Davey J, Primbramska I, Gilbert R. Overview of child deaths in the four UK countries. London: 2013.

For peer review only

1  
2  
3  
4  
5  
6  
7  
8  
9  
10  
11  
12  
13  
14  
15  
16  
17  
18  
19  
20  
21  
22  
23  
24  
25  
26  
27  
28  
29  
30  
31  
32  
33  
34  
35  
36  
37  
38  
39  
40  
41  
42  
43  
44  
45  
46  
47  
48  
49  
50  
51  
52  
53  
54  
55  
56  
57  
58  
59  
60

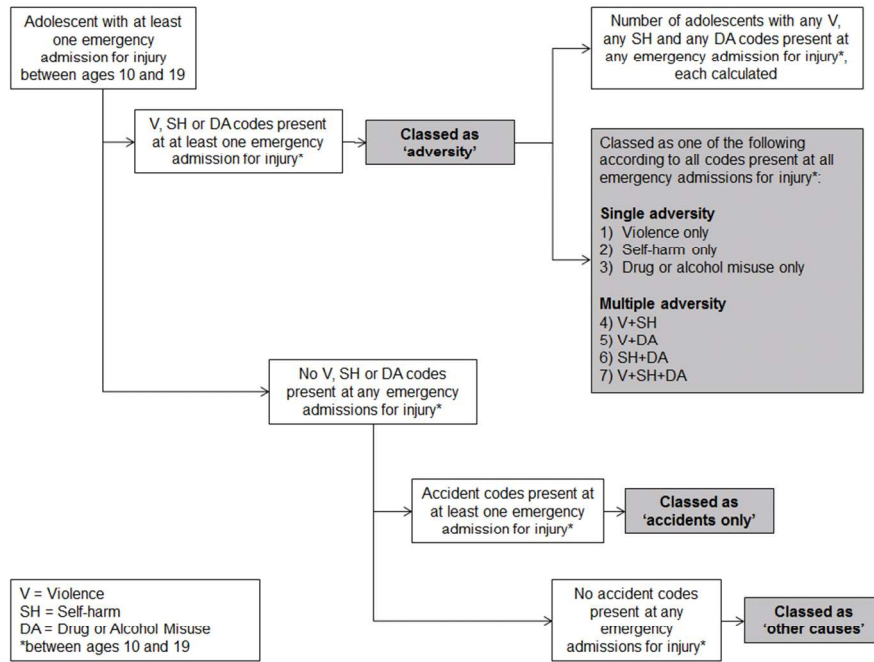

Classification of groups of adolescents.  
282x212mm (96 x 96 DPI)

Review only

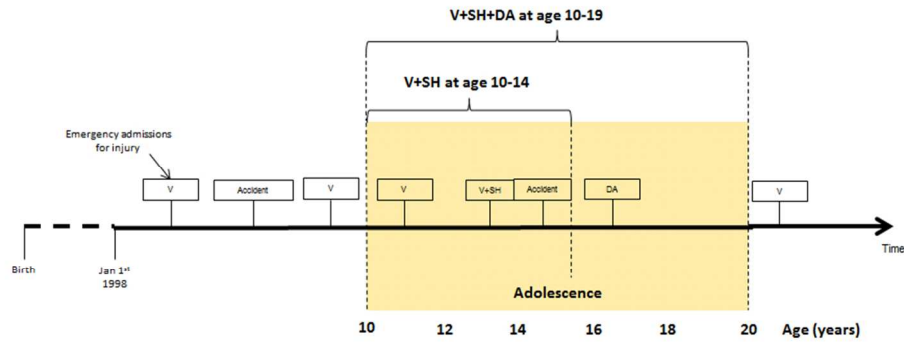

Supplementary Figure 2. Example of classification of groups of adolescents within age groups and across adolescence (ages 10-19).

V = victimisation, SH = self-harm, DA = drug or alcohol misuse.  
 254x102mm (96 x 96 DPI)

er review only

## STROBE Statement—checklist of items that should be included in reports of observational studies

|                              | Item No | Recommendation                                                                                                                                                                                                                                                                                                                                                                                                                                                                                                                                                                                                                                                                                        |
|------------------------------|---------|-------------------------------------------------------------------------------------------------------------------------------------------------------------------------------------------------------------------------------------------------------------------------------------------------------------------------------------------------------------------------------------------------------------------------------------------------------------------------------------------------------------------------------------------------------------------------------------------------------------------------------------------------------------------------------------------------------|
| <b>Title and abstract</b>    | 1       | (a) Indicate the study's design with a commonly used term in the title or the abstract<br>(b) Provide in the abstract an informative and balanced summary of what was done and what was found                                                                                                                                                                                                                                                                                                                                                                                                                                                                                                         |
| <b>Introduction</b>          |         |                                                                                                                                                                                                                                                                                                                                                                                                                                                                                                                                                                                                                                                                                                       |
| Background/rationale         | 2       | Explain the scientific background and rationale for the investigation being reported                                                                                                                                                                                                                                                                                                                                                                                                                                                                                                                                                                                                                  |
| Objectives                   | 3       | State specific objectives, including any prespecified hypotheses                                                                                                                                                                                                                                                                                                                                                                                                                                                                                                                                                                                                                                      |
| <b>Methods</b>               |         |                                                                                                                                                                                                                                                                                                                                                                                                                                                                                                                                                                                                                                                                                                       |
| Study design                 | 4       | Present key elements of study design early in the paper                                                                                                                                                                                                                                                                                                                                                                                                                                                                                                                                                                                                                                               |
| Setting                      | 5       | Describe the setting, locations, and relevant dates, including periods of recruitment, exposure, follow-up, and data collection                                                                                                                                                                                                                                                                                                                                                                                                                                                                                                                                                                       |
| Participants                 | 6       | (a) <i>Cohort study</i> —Give the eligibility criteria, and the sources and methods of selection of participants. Describe methods of follow-up<br><i>Case-control study</i> —Give the eligibility criteria, and the sources and methods of case ascertainment and control selection. Give the rationale for the choice of cases and controls<br><i>Cross-sectional study</i> —Give the eligibility criteria, and the sources and methods of selection of participants<br>(b) <i>Cohort study</i> —For matched studies, give matching criteria and number of exposed and unexposed. N/A<br><i>Case-control study</i> —For matched studies, give matching criteria and the number of controls per case |
| Variables                    | 7       | Clearly define all outcomes, exposures, predictors, potential confounders, and effect modifiers. Give diagnostic criteria, if applicable                                                                                                                                                                                                                                                                                                                                                                                                                                                                                                                                                              |
| Data sources/<br>measurement | 8*      | For each variable of interest, give sources of data and details of methods of assessment (measurement). Describe comparability of assessment methods if there is more than one group                                                                                                                                                                                                                                                                                                                                                                                                                                                                                                                  |
| Bias                         | 9       | Describe any efforts to address potential sources of bias. We only analysed those who could be observed between ages 10 and 19, so no bias due to different lengths of admission trajectories.                                                                                                                                                                                                                                                                                                                                                                                                                                                                                                        |
| Study size                   | 10      | Explain how the study size was arrived at. All available administrative data.                                                                                                                                                                                                                                                                                                                                                                                                                                                                                                                                                                                                                         |
| Quantitative variables       | 11      | Explain how quantitative variables were handled in the analyses. If applicable, describe which groupings were chosen and why                                                                                                                                                                                                                                                                                                                                                                                                                                                                                                                                                                          |
| Statistical methods          | 12      | (a) Describe all statistical methods, including those used to control for confounding<br>(b) Describe any methods used to examine subgroups and interactions<br>(c) Explain how missing data were addressed. N/A<br>(d) <i>Cohort study</i> —If applicable, explain how loss to follow-up was addressed. We only analysed those who could be observed between ages 10 and 19.<br><i>Case-control study</i> —If applicable, explain how matching of cases and controls was addressed<br><i>Cross-sectional study</i> —If applicable, describe analytical methods taking account of sampling strategy<br>(e) Describe any sensitivity analyses. N/A                                                     |

Continued on next page

**Results**

|                  |     |                                                                                                                                                                                                                                                                                                                                                                                                                                                                                                                         |
|------------------|-----|-------------------------------------------------------------------------------------------------------------------------------------------------------------------------------------------------------------------------------------------------------------------------------------------------------------------------------------------------------------------------------------------------------------------------------------------------------------------------------------------------------------------------|
| Participants     | 13* | (a) Report numbers of individuals at each stage of study—eg numbers potentially eligible, examined for eligibility, confirmed eligible, included in the study, completing follow-up, and analysed<br>(b) Give reasons for non-participation at each stage. <i>N/A</i><br>(c) Consider use of a flow diagram. <i>We didn't use a flow diagram as eligibility could be described using one sentence.</i>                                                                                                                  |
| Descriptive data | 14* | (a) Give characteristics of study participants (eg demographic, clinical, social) and information on exposures and potential confounders<br>(b) Indicate number of participants with missing data for each variable of interest<br>(c) <i>Cohort study</i> —Summarise follow-up time (eg, average and total amount). <i>N/A</i>                                                                                                                                                                                         |
| Outcome data     | 15* | <i>Cohort study</i> —Report numbers of outcome events or summary measures over time. <i>We state how many emergency admissions for adversity-related injury the adversity group had. We also provide a table indicating the number of emergency admissions for injury and admissions (of any type) during ages 10-19.</i><br><i>Case-control study</i> —Report numbers in each exposure category, or summary measures of exposure<br><i>Cross-sectional study</i> —Report numbers of outcome events or summary measures |
| Main results     | 16  | (a) Give unadjusted estimates and, if applicable, confounder-adjusted estimates and their precision (eg, 95% confidence interval). Make clear which confounders were adjusted for and why they were included. <i>We gave prevalence estimates stratified by age-group and sex.</i><br>(b) Report category boundaries when continuous variables were categorized<br>(c) If relevant, consider translating estimates of relative risk into absolute risk for a meaningful time period. <i>N/A</i>                         |
| Other analyses   | 17  | Report other analyses done—eg analyses of subgroups and interactions; and sensitivity analyses                                                                                                                                                                                                                                                                                                                                                                                                                          |

**Discussion**

|                  |    |                                                                                                                                                                            |
|------------------|----|----------------------------------------------------------------------------------------------------------------------------------------------------------------------------|
| Key results      | 18 | Summarise key results with reference to study objectives                                                                                                                   |
| Limitations      | 19 | Discuss limitations of the study, taking into account sources of potential bias or imprecision. Discuss both direction and magnitude of any potential bias                 |
| Interpretation   | 20 | Give a cautious overall interpretation of results considering objectives, limitations, multiplicity of analyses, results from similar studies, and other relevant evidence |
| Generalisability | 21 | Discuss the generalisability (external validity) of the study results                                                                                                      |

**Other information**

|         |    |                                                                                                                                                               |
|---------|----|---------------------------------------------------------------------------------------------------------------------------------------------------------------|
| Funding | 22 | Give the source of funding and the role of the funders for the present study and, if applicable, for the original study on which the present article is based |
|---------|----|---------------------------------------------------------------------------------------------------------------------------------------------------------------|

\*Give information separately for cases and controls in case-control studies and, if applicable, for exposed and unexposed groups in cohort and cross-sectional studies.

**Note:** An Explanation and Elaboration article discusses each checklist item and gives methodological background and published examples of transparent reporting. The STROBE checklist is best used in conjunction with this article (freely available on the Web sites of PLoS Medicine at <http://www.plosmedicine.org/>, Annals of Internal Medicine at <http://www.annals.org/>, and Epidemiology at <http://www.epidem.com/>). Information on the STROBE Initiative is available at [www.strobe-statement.org](http://www.strobe-statement.org).
