# Supplementary material for: Violence, self-harm and drug or alcohol misuse in adolescents admitted to hospitals in England for injury: a retrospective cohort study
Source: HighWire-hosted journal article supplement (doi:10.1136/bmjopen-2014-006079), 2015-02-01
Supplement: bmjopen-2014-006079supp_figures.pdf [file bmjopen-2014-006079supp_figures.pdf]

Supplementary Figures

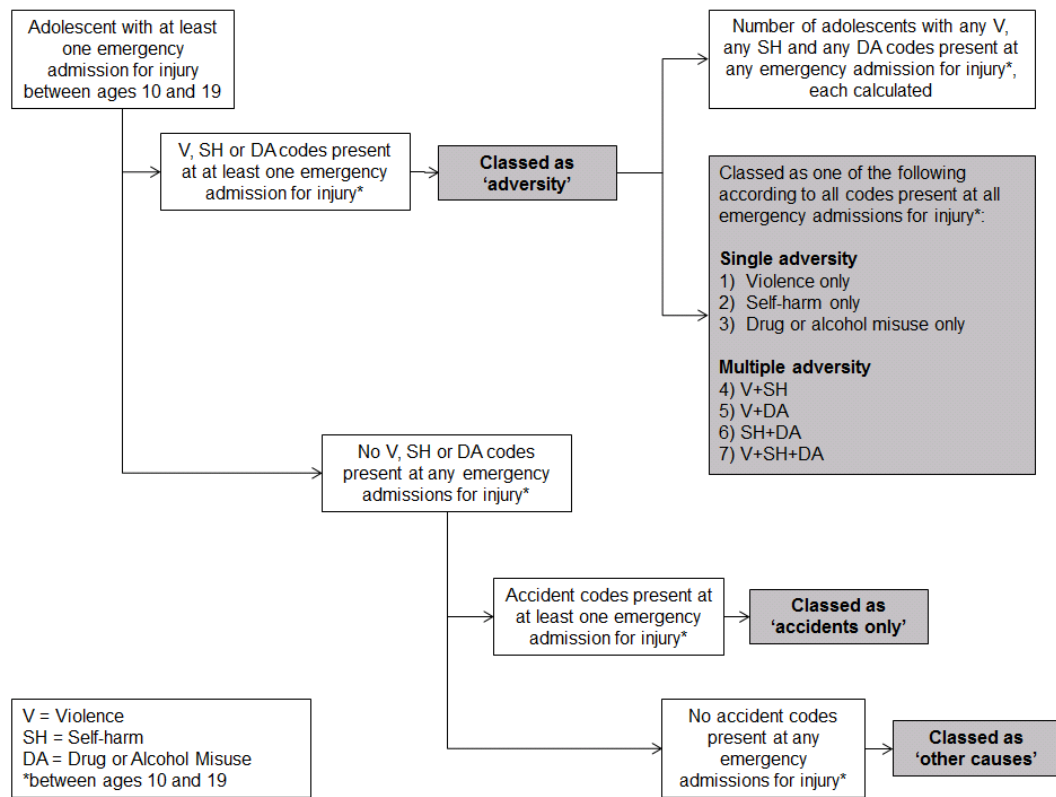

Supplementary Figure 1: Classification of groups of adolescents.

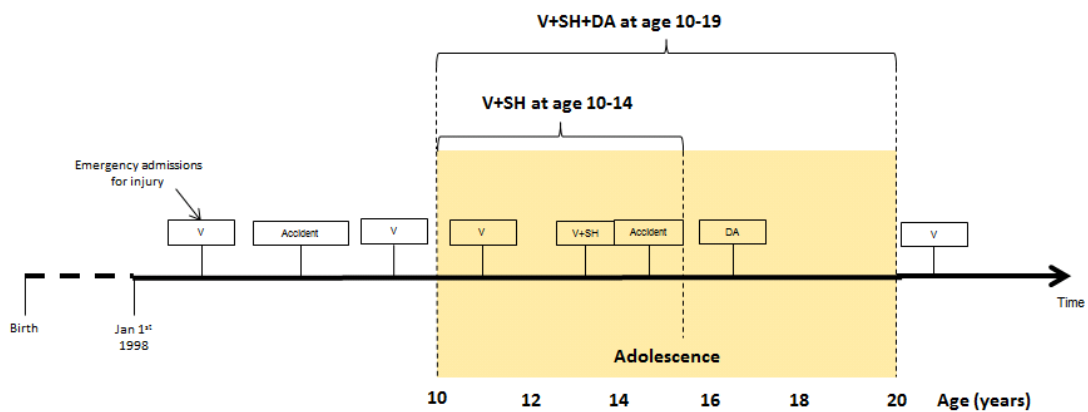

Supplementary Figure 2. Example of classification of groups of adolescents within age groups and across adolescence (ages 10-19).

V = victimisation, SH = self-harm, DA = drug or alcohol misuse.
